# Supplementary material for: Nutrition Interventions for Pediatric Obesity Prevention: An Umbrella Review of Systematic Reviews
Source: MDPI journal article supplement (doi:10.3390/nu15245097), 2023-12-13
Supplement: s1 [file s1]

Peds Obesity prevention Search June 8, 2023

Table S1. Summary of Entries Obtained from Databases Search on June 8, 2023 (Updated from 2021)

|                     |             |
|---------------------|-------------|
| MEDLINE             | 1274        |
| CINAHL              | 665         |
| Food Science Source | 425         |
| CDSR                | 16          |
| Total               | 2380        |
| Duplicates          | 650+170=820 |
| Unique Citations    | 1560        |

Table S2. MEDLINE search for Systematic Reviews Examining Impact of Pediatric Obesity Interventions on June 8, 2023

|     |                                                      |                                                                                                                                          |                                                                                                |
|-----|------------------------------------------------------|------------------------------------------------------------------------------------------------------------------------------------------|------------------------------------------------------------------------------------------------|
| S49 | S37 AND S46                                          | <b>Limiters</b> - Date of Publication: 20210101-20231231<br><b>Narrow by Language:</b> - english<br><b>Search modes</b> - Boolean/Phrase | <a href="#">View Results</a> (1,274)<br><a href="#">View Details</a><br><a href="#">Edit</a>   |
| S48 | S37 AND S46                                          | <b>Limiters</b> - Date of Publication: 20210101-20231231<br><b>Search modes</b> - Boolean/Phrase                                         | <a href="#">View Results</a> (1,289)<br><a href="#">View Details</a><br><a href="#">Edit</a>   |
| S47 | S37 AND S46                                          | <b>Search modes</b> - Boolean/Phrase                                                                                                     | <a href="#">View Results</a> (5,018)<br><a href="#">View Details</a><br><a href="#">Edit</a>   |
| S46 | S38 OR S39 OR S40 OR S41 OR S42 OR S43 OR S44 OR S45 | <b>Search modes</b> - Boolean/Phrase                                                                                                     | <a href="#">View Results</a> (640,460)<br><a href="#">View Details</a><br><a href="#">Edit</a> |
| S45 | AB "risk of bias"                                    | <b>Search modes</b> - Boolean/Phrase                                                                                                     | <a href="#">View Results</a> (40,379)<br><a href="#">View Details</a><br><a href="#">Edit</a>  |
| S44 | AB (risk of bias or (newcastle N2 ottawa))           | <b>Search modes</b> - Boolean/Phrase                                                                                                     | <a href="#">View Results</a> (48,981)<br><a href="#">View Details</a>                          |

|     |                                                                                                                                                                                                |                                      |                                                                                                |
|-----|------------------------------------------------------------------------------------------------------------------------------------------------------------------------------------------------|--------------------------------------|------------------------------------------------------------------------------------------------|
|     |                                                                                                                                                                                                |                                      | <a href="#">Edit</a>                                                                           |
| S43 | AB (data extraction or pubmed or medline or cinahl or scopus or embase)                                                                                                                        | <b>Search modes</b> - Boolean/Phrase | <a href="#">View Results</a> (334,794)<br><a href="#">View Details</a><br><a href="#">Edit</a> |
| S42 | SO cochrane OR systematic review*                                                                                                                                                              | <b>Search modes</b> - Boolean/Phrase | <a href="#">View Results</a> (323,051)<br><a href="#">View Details</a><br><a href="#">Edit</a> |
| S41 | ( TI (metaanaly* or meta-analy*) OR AB (metaanaly* or meta-analy*) ) OR ( TI (evidence N2 synthesi*) OR AB (evidence N2 synthesi*) ) OR ( TI (evidence N2 review) OR AB (evidence N2 review) ) | <b>Search modes</b> - Boolean/Phrase | <a href="#">View Results</a> (331,039)<br><a href="#">View Details</a><br><a href="#">Edit</a> |
| S40 | TI ((systematic or scoping or meta- or overview* or review) N2 review*) or AB ((systematic or scoping or meta- or overview*) N2 review*)                                                       | <b>Search modes</b> - Boolean/Phrase | <a href="#">View Results</a> (338,079)<br><a href="#">View Details</a><br><a href="#">Edit</a> |
| S39 | (MH "Network Meta-Analysis") or MH "meta-analysis"                                                                                                                                             | <b>Search modes</b> - Boolean/Phrase | <a href="#">View Results</a> (183,087)<br><a href="#">View Details</a><br><a href="#">Edit</a> |
| S38 | (MH "Systematic Review") OR (MH "Systematic Reviews as Topic")                                                                                                                                 | <b>Search modes</b> - Boolean/Phrase | <a href="#">View Results</a> (239,616)<br><a href="#">View Details</a><br><a href="#">Edit</a> |
| S37 | (S28 AND S35) OR S36                                                                                                                                                                           | <b>Search modes</b> - Boolean/Phrase | <a href="#">View Results</a> (140,605)<br><a href="#">View Details</a><br><a href="#">Edit</a> |
| S36 | (MH "Child Nutrition Sciences" )                                                                                                                                                               | <b>Search modes</b> - Boolean/Phrase | <a href="#">View Results</a> (1,178)<br><a href="#">View Details</a><br><a href="#">Edit</a>   |
| S35 | S29 OR S30 OR S31 OR S32 OR S33 OR S34                                                                                                                                                         | <b>Search modes</b> - Boolean/Phrase | <a href="#">View Results</a> (3,972,961)<br><a href="#">View Details</a>                       |

|     |                                                                                                                                                                                                                                                                                                                                                        |                                      |                                                                                                  |
|-----|--------------------------------------------------------------------------------------------------------------------------------------------------------------------------------------------------------------------------------------------------------------------------------------------------------------------------------------------------------|--------------------------------------|--------------------------------------------------------------------------------------------------|
|     |                                                                                                                                                                                                                                                                                                                                                        |                                      | <a href="#">Edit</a>                                                                             |
| S34 | TI paediatric* or AB paediatric*                                                                                                                                                                                                                                                                                                                       | <b>Search modes</b> - Boolean/Phrase | <a href="#">View Results</a> (79,333)<br><a href="#">View Details</a><br><a href="#">Edit</a>    |
| S33 | TI (pediatric*) OR AB pediatric*                                                                                                                                                                                                                                                                                                                       | <b>Search modes</b> - Boolean/Phrase | <a href="#">View Results</a> (370,651)<br><a href="#">View Details</a><br><a href="#">Edit</a>   |
| S32 | MW (pediatric*)                                                                                                                                                                                                                                                                                                                                        | <b>Search modes</b> - Boolean/Phrase | <a href="#">View Results</a> (113,453)<br><a href="#">View Details</a><br><a href="#">Edit</a>   |
| S31 | TI (preschool* or pre-school* or<br>highschool* or middle school* or<br>kindergar* or kintergar* or play<br>school or play schools or<br>playschool* or "after school") OR<br>AB (preschool* or pre- school* or<br>highschool* or middle school* or<br>kindergar* or kintergar* or play<br>school or play schools or<br>playschool* or "after school") | <b>Search modes</b> - Boolean/Phrase | <a href="#">View Results</a> (60,654)<br><a href="#">View Details</a><br><a href="#">Edit</a>    |
| S30 | ( TI (child or childs or children or<br>child's or childhood or teen* or<br>adolescent* or adolescence) ) OR<br>( AB (child or childs or children or<br>child's or childhood or teen* or<br>adolescent* or adolescence) )                                                                                                                              | <b>Search modes</b> - Boolean/Phrase | <a href="#">View Results</a> (1,800,396)<br><a href="#">View Details</a><br><a href="#">Edit</a> |
| S29 | (MH "Child+") OR (MH<br>"Adolescent")                                                                                                                                                                                                                                                                                                                  | <b>Search modes</b> - Boolean/Phrase | <a href="#">View Results</a> (3,355,090)<br><a href="#">View Details</a><br><a href="#">Edit</a> |
| S28 | S1 OR S2 OR S3 OR S4 OR S5<br>OR S6 OR S7 OR S8 OR S9 OR<br>S10 OR S11 OR S12 OR S13 OR<br>S14 OR S15 OR S16 OR S17 OR<br>S18 OR S19 OR S20 OR S21 OR                                                                                                                                                                                                  | <b>Search modes</b> - Boolean/Phrase | <a href="#">View Results</a> (940,709)<br><a href="#">View Details</a><br><a href="#">Edit</a>   |

|     |                                                                                                                                                                   |                                      |                                                                                               |
|-----|-------------------------------------------------------------------------------------------------------------------------------------------------------------------|--------------------------------------|-----------------------------------------------------------------------------------------------|
|     | S22 OR S23 OR S24 OR S25 OR S26 OR S27                                                                                                                            |                                      |                                                                                               |
| S27 | TI (nutrition N2 (counsel* or advice or advis*)) OR AB (nutrition N2 (counsel* or advice or advis*))                                                              | <b>Search modes</b> - Boolean/Phrase | <a href="#">View Results</a> (2,239)<br><a href="#">View Details</a><br><a href="#">Edit</a>  |
| S26 | TI (nutrition N2 (therapy or therapies)) OR AB (nutrition N2 (therapy or therapies))                                                                              | <b>Search modes</b> - Boolean/Phrase | <a href="#">View Results</a> (3,457)<br><a href="#">View Details</a><br><a href="#">Edit</a>  |
| S25 | TI (nutrition N2 (guide* OR guidanc* or guiding)) OR AB (nutrition N2 (guide* OR guidanc* or guiding))                                                            | <b>Search modes</b> - Boolean/Phrase | <a href="#">View Results</a> (2,208)<br><a href="#">View Details</a><br><a href="#">Edit</a>  |
| S24 | TI (food N2 (guide* OR guidanc* or guiding)) OR AB (food N2 (guide* OR guidanc* or guiding))                                                                      | <b>Search modes</b> - Boolean/Phrase | <a href="#">View Results</a> (2,511)<br><a href="#">View Details</a><br><a href="#">Edit</a>  |
| S23 | MH "Food+" AND MH "Decision Making"                                                                                                                               | <b>Search modes</b> - Boolean/Phrase | <a href="#">View Results</a> (617)<br><a href="#">View Details</a><br><a href="#">Edit</a>    |
| S22 | MH "Food+" AND MH "Choice Behavior"                                                                                                                               | <b>Search modes</b> - Boolean/Phrase | <a href="#">View Results</a> (2,346)<br><a href="#">View Details</a><br><a href="#">Edit</a>  |
| S21 | TI (healthy meal*) or AB (healthy meal*)                                                                                                                          | <b>Search modes</b> - Boolean/Phrase | <a href="#">View Results</a> (2,066)<br><a href="#">View Details</a><br><a href="#">Edit</a>  |
| S20 | TI ((healthy or poor) N2 eating) OR AB ((healthy or poor) N2 eating)                                                                                              | <b>Search modes</b> - Boolean/Phrase | <a href="#">View Results</a> (11,318)<br><a href="#">View Details</a><br><a href="#">Edit</a> |
| S19 | TI (("soft drink" or "soft drinks" or ((sugar sweetened N2 (food or foods or beverage* or drink or drinks)) N2 (consum* or intake)) OR AB (("soft drink" or "soft | <b>Search modes</b> - Boolean/Phrase | <a href="#">View Results</a> (6,473)<br><a href="#">View Details</a><br><a href="#">Edit</a>  |

|     |                                                                                                                                                                                                                  |                                      |                                                                                               |
|-----|------------------------------------------------------------------------------------------------------------------------------------------------------------------------------------------------------------------|--------------------------------------|-----------------------------------------------------------------------------------------------|
|     | drinks" or ((sugar sweetened N2 (food or foods or beverage* or drink or drinks)) N2 (consum* or intake))                                                                                                         |                                      |                                                                                               |
| S18 | TI ("lunch program" or "lunch programs" or "lunch programme" or "lunch programmes" or "school lunch*") OR AB ("lunch program" or "lunch programs" or "lunch programme" or "lunch programmes" or "school lunch*") | <b>Search modes</b> - Boolean/Phrase | <a href="#">View Results</a> (1,171)<br><a href="#">View Details</a><br><a href="#">Edit</a>  |
| S17 | TI (Recommended Dietary Allowance*) OR AB (Recommended Dietary Allowance*)                                                                                                                                       | <b>Search modes</b> - Boolean/Phrase | <a href="#">View Results</a> (2,274)<br><a href="#">View Details</a><br><a href="#">Edit</a>  |
| S16 | TI (recommended daily allowance) OR AB (recommended daily allowance)                                                                                                                                             | <b>Search modes</b> - Boolean/Phrase | <a href="#">View Results</a> (991)<br><a href="#">View Details</a><br><a href="#">Edit</a>    |
| S15 | TI ((nutrition or food or foods) N2 (policy or policies or program* )) OR AB ((nutrition or food or foods) N2 (policy or policies or program* ))                                                                 | <b>Search modes</b> - Boolean/Phrase | <a href="#">View Results</a> (13,006)<br><a href="#">View Details</a><br><a href="#">Edit</a> |
| S14 | (MH "Recommended Dietary Allowances") OR (MH "Nutrition Policy") OR (MH "Nutritional Sciences")                                                                                                                  | <b>Search modes</b> - Boolean/Phrase | <a href="#">View Results</a> (24,204)<br><a href="#">View Details</a><br><a href="#">Edit</a> |
| S13 | MH "Nutrition Surveys" OR MH "Diet Surveys"                                                                                                                                                                      | <b>Search modes</b> - Boolean/Phrase | <a href="#">View Results</a> (33,001)<br><a href="#">View Details</a><br><a href="#">Edit</a> |
| S12 | TI (food N2 Legislation) OR AB (food N2 Legislation)                                                                                                                                                             | <b>Search modes</b> - Boolean/Phrase | <a href="#">View Results</a> (379)<br><a href="#">View Details</a><br><a href="#">Edit</a>    |

|     |                                                                                                                                                                                                                                                                                                                                                                                                                      |                                      |                                                                                               |
|-----|----------------------------------------------------------------------------------------------------------------------------------------------------------------------------------------------------------------------------------------------------------------------------------------------------------------------------------------------------------------------------------------------------------------------|--------------------------------------|-----------------------------------------------------------------------------------------------|
| S11 | TI ("Supplemental Nutrition Assistance Program" or "food stamps" or "food aid" or "snap program*" or "food assistance" OR "Special Supplemental Nutrition Program for Women" or "WIC program*") OR AB ("Supplemental Nutrition Assistance Program" or "food stamps" or "food stamps" or "food aid" or "snap program*" or "food assistance" OR "Special Supplemental Nutrition Program for Women" or "WIC program*")) | <b>Search modes</b> - Boolean/Phrase | <a href="#">View Results</a> (2,830)<br><a href="#">View Details</a><br><a href="#">Edit</a>  |
| S10 | (MH "Legislation, Food") OR (MH "Food Assistance")                                                                                                                                                                                                                                                                                                                                                                   | <b>Search modes</b> - Boolean/Phrase | <a href="#">View Results</a> (4,286)<br><a href="#">View Details</a><br><a href="#">Edit</a>  |
| S9  | MH "Diet Therapy+" OR MH "Nutrition Therapy"                                                                                                                                                                                                                                                                                                                                                                         | <b>Search modes</b> - Boolean/Phrase | <a href="#">View Results</a> (65,123)<br><a href="#">View Details</a><br><a href="#">Edit</a> |
| S8  | TI (feeding behavior* or feeding behaviour*) or AB (feeding behavior* or feeding behaviour*)                                                                                                                                                                                                                                                                                                                         | <b>Search modes</b> - Boolean/Phrase | <a href="#">View Results</a> (16,527)<br><a href="#">View Details</a><br><a href="#">Edit</a> |
| S7  | TI ((food or eating) N2 (behavior* or behaviour* or habit or habits or preference*)) OR AB ((food or eating) N2 (behavior* or behaviour* or habit or habits or preference*))                                                                                                                                                                                                                                         | <b>Search modes</b> - Boolean/Phrase | <a href="#">View Results</a> (36,299)<br><a href="#">View Details</a><br><a href="#">Edit</a> |
| S6  | (MH "Fast Foods") OR TI ("fast food*" OR "junk food*" or "processed food*" or convenience food* or "ready to eat" or "ready prepared food*") OR AB ("fast food*" OR "junk food*" or "processed food*" or convenience                                                                                                                                                                                                 | <b>Search modes</b> - Boolean/Phrase | <a href="#">View Results</a> (14,938)<br><a href="#">View Details</a><br><a href="#">Edit</a> |

|    |                                                                                                                                                                                                |                                      |                                                                                                |
|----|------------------------------------------------------------------------------------------------------------------------------------------------------------------------------------------------|--------------------------------------|------------------------------------------------------------------------------------------------|
|    | food* or "ready to eat" or "ready prepared food*")                                                                                                                                             |                                      |                                                                                                |
| S5 | MH "Food Preferences" OR MH "Food Fussiness"                                                                                                                                                   | <b>Search modes</b> - Boolean/Phrase | <a href="#">View Results</a> (16,314)<br><a href="#">View Details</a><br><a href="#">Edit</a>  |
| S4 | MH "Feeding Behavior"                                                                                                                                                                          | <b>Search modes</b> - Boolean/Phrase | <a href="#">View Results</a> (92,470)<br><a href="#">View Details</a><br><a href="#">Edit</a>  |
| S3 | TI (energy intake or (calori* N2 (intake or restriction*)) OR portion size* or serving size*) OR AB (energy intake or (calori* N2 (intake or restriction*)) OR portion size* or serving size*) | <b>Search modes</b> - Boolean/Phrase | <a href="#">View Results</a> (58,456)<br><a href="#">View Details</a><br><a href="#">Edit</a>  |
| S2 | TI (diet*) or AB (diet*)                                                                                                                                                                       | <b>Search modes</b> - Boolean/Phrase | <a href="#">View Results</a> (666,704)<br><a href="#">View Details</a><br><a href="#">Edit</a> |
| S1 | (MH "Diet+") OR ( (MH "Nutritionists") OR (MH "Dietetics") )                                                                                                                                   | <b>Search modes</b> - Boolean/Phrase | <a href="#">View Results</a> (334,659)<br><a href="#">View Details</a><br><a href="#">Edit</a> |

Table S3. CINAHL search for Systematic Reviews Examining Impact of Pediatric Obesity Interventions on June 8, 2023

|     |                                                                               |                                                                                  |                                                                                                                                                   |         |
|-----|-------------------------------------------------------------------------------|----------------------------------------------------------------------------------|---------------------------------------------------------------------------------------------------------------------------------------------------|---------|
| S49 | S37 AND S46                                                                   | Limiters - Published Date:<br>20210101-20231231<br>Search modes - Boolean/Phrase | Interface - EBSCO Discovery Service<br>Search Screen - Advanced Search<br>Database - Discovery Service for<br>Academy of Nutrition and Dietetics. | 665     |
| S48 | S37 AND S46                                                                   | Limiters - Published Date:<br>20210101-20231231<br>Search modes - Boolean/Phrase | Interface - EBSCO Discovery Service<br>Search Screen - Advanced Search<br>Database - Discovery Service for<br>Academy of Nutrition and Dietetics. | 679     |
| S47 | S37 AND S46                                                                   | Search modes - Boolean/Phrase                                                    | Interface - EBSCO Discovery Service<br>Search Screen - Advanced Search<br>Database - Discovery Service for<br>Academy of Nutrition and Dietetics. | 3,053   |
| S46 | S38 OR S39 OR S40 OR S41 OR<br>S42 OR S43 OR S44 OR S45                       | Search modes - Boolean/Phrase                                                    | Interface - EBSCO Discovery Service<br>Search Screen - Advanced Search<br>Database - Discovery Service for<br>Academy of Nutrition and Dietetics. | 292,327 |
| S45 | AB "risk of bias"                                                             | Search modes - Boolean/Phrase                                                    | Interface - EBSCO Discovery Service<br>Search Screen - Advanced Search<br>Database - Discovery Service for<br>Academy of Nutrition and Dietetics. | 15,707  |
| S44 | AB (risk of bias or (newcastle N2<br>ottawa))                                 | Search modes - Boolean/Phrase                                                    | Interface - EBSCO Discovery Service<br>Search Screen - Advanced Search<br>Database - Discovery Service for<br>Academy of Nutrition and Dietetics. | 20,147  |
| S43 | AB (data extraction or pubmed or<br>medline or cinahl or scopus or<br>embase) | Search modes - Boolean/Phrase                                                    | Interface - EBSCO Discovery Service<br>Search Screen - Advanced Search<br>Database - Discovery Service for<br>Academy of Nutrition and Dietetics. | 125,397 |
| S42 | SO cochrane OR systematic<br>review*                                          | Search modes - Boolean/Phrase                                                    | Interface - EBSCO Discovery Service<br>Search Screen - Advanced Search<br>Database - Discovery Service for<br>Academy of Nutrition and Dietetics. | 196,840 |



|     |                                                                                                                                                                                              |                               |                                                                                                                                                   |           |
|-----|----------------------------------------------------------------------------------------------------------------------------------------------------------------------------------------------|-------------------------------|---------------------------------------------------------------------------------------------------------------------------------------------------|-----------|
| S41 | TI (metaanaly* or meta-analy*) OR AB (metaanaly* or meta-analy*) ) OR ( TI (evidence N2 synthesi*) OR AB (evidence N2 synthesi*) ) OR ( TI (evidence N2 review) OR AB (evidence N2 review) ) | Search modes - Boolean/Phrase | Interface - EBSCO Discovery Service<br>Search Screen - Advanced Search<br>Database - Discovery Service for<br>Academy of Nutrition and Dietetics. | 130,723   |
| S40 | TI ((systematic or scoping or meta- or overview* or review) N2 review*) or AB ((systematic or scoping or meta- or overview*) N2 review*)                                                     | Search modes - Boolean/Phrase | Interface - EBSCO Discovery Service<br>Search Screen - Advanced Search<br>Database - Discovery Service for<br>Academy of Nutrition and Dietetics. | 162,652   |
| S39 | (MH "Meta Analysis") OR (MH "Meta Synthesis")                                                                                                                                                | Search modes - Boolean/Phrase | Interface - EBSCO Discovery Service<br>Search Screen - Advanced Search<br>Database - Discovery Service for<br>Academy of Nutrition and Dietetics. | 71,212    |
| S38 | (MH "Systematic Review") OR (MH "Scoping Review") OR (MH "Cochrane Library")                                                                                                                 | Search modes - Boolean/Phrase | Interface - EBSCO Discovery Service<br>Search Screen - Advanced Search<br>Database - Discovery Service for<br>Academy of Nutrition and Dietetics. | 133,396   |
| S37 | (S28 AND S35) OR S36                                                                                                                                                                         | Search modes - Boolean/Phrase | Interface - EBSCO Discovery Service<br>Search Screen - Advanced Search<br>Database - Discovery Service for<br>Academy of Nutrition and Dietetics. | 65,772    |
| S36 | (MH "Adolescent Nutrition") OR (MH "Adolescent Nutritional Physiology") OR (MH "Child Nutritional Physiology") OR (MH "Child Nutrition")                                                     | Search modes - Boolean/Phrase | Interface - EBSCO Discovery Service<br>Search Screen - Advanced Search<br>Database - Discovery Service for<br>Academy of Nutrition and Dietetics. | 10,112    |
| S35 | S29 OR S30 OR S31 OR S32 OR S33 OR S34                                                                                                                                                       | Search modes - Boolean/Phrase | Interface - EBSCO Discovery Service<br>Search Screen - Advanced Search<br>Database - Discovery Service for<br>Academy of Nutrition and Dietetics. | 1,210,595 |
| S34 | TI paediatric* or AB paediatric*                                                                                                                                                             | Search modes - Boolean/Phrase | Interface - EBSCO Discovery Service<br>Search Screen - Advanced Search                                                                            | 30,992    |

|     |                                                                                                                                                                                                                                                                                                                             |                               |                                                                                                                                                |         |
|-----|-----------------------------------------------------------------------------------------------------------------------------------------------------------------------------------------------------------------------------------------------------------------------------------------------------------------------------|-------------------------------|------------------------------------------------------------------------------------------------------------------------------------------------|---------|
|     |                                                                                                                                                                                                                                                                                                                             |                               | Database - Discovery Service for Academy of Nutrition and Dietetics.                                                                           |         |
| S33 | TI (pediatric*) OR AB pediatric*                                                                                                                                                                                                                                                                                            | Search modes - Boolean/Phrase | Interface - EBSCO Discovery Service<br>Search Screen - Advanced Search<br>Database - Discovery Service for Academy of Nutrition and Dietetics. | 142,927 |
| S32 | MW (pediatric*)                                                                                                                                                                                                                                                                                                             | Search modes - Boolean/Phrase | Interface - EBSCO Discovery Service<br>Search Screen - Advanced Search<br>Database - Discovery Service for Academy of Nutrition and Dietetics. | 100,858 |
| S31 | TI (preschool* or pre-school* or highschool* or middle school* or kindergar* or kintergar* or play school or play schools or playschool* or "after school") OR AB (preschool* or pre- school* or highschool* or middle school* or kindergar* or kintergar* or play school or play schools or playschool* or "after school") | Search modes - Boolean/Phrase | Interface - EBSCO Discovery Service<br>Search Screen - Advanced Search<br>Database - Discovery Service for Academy of Nutrition and Dietetics. | 29,880  |
| S30 | ( TI (child or childs or children or child's or childhood or teen* or adolescent* or adolescence) ) OR ( AB (child or childs or children or child's or childhood or teen* or adolescent* or adolescence) )                                                                                                                  | Search modes - Boolean/Phrase | Interface - EBSCO Discovery Service<br>Search Screen - Advanced Search<br>Database - Discovery Service for Academy of Nutrition and Dietetics. | 683,107 |
| S29 | (MH "Child") OR (MH "Adolescence+")                                                                                                                                                                                                                                                                                         | Search modes - Boolean/Phrase | Interface - EBSCO Discovery Service<br>Search Screen - Advanced Search<br>Database - Discovery Service for Academy of Nutrition and Dietetics. | 885,263 |
| S28 | S1 OR S2 OR S3 OR S4 OR S6 OR S7 OR S8 OR S9 OR S10 OR S11 OR S12 OR S13 OR S15 OR S16 OR S17 OR S18 OR S19 OR                                                                                                                                                                                                              | Search modes - Boolean/Phrase | Interface - EBSCO Discovery Service<br>Search Screen - Advanced Search<br>Database - Discovery Service for Academy of Nutrition and Dietetics. | 278,983 |

|     |                                                                                                        |                               |                                                                                                                                          |       |
|-----|--------------------------------------------------------------------------------------------------------|-------------------------------|------------------------------------------------------------------------------------------------------------------------------------------|-------|
|     | S20 OR S21 OR S23 OR S24 OR S25 OR S26 OR S27                                                          |                               |                                                                                                                                          |       |
| S27 | TI (nutrition N2 (counsel* or advice or advis*)) OR AB (nutrition N2 (counsel* or advice or advis*))   | Search modes - Boolean/Phrase | Interface - EBSCO Discovery Service Search Screen - Advanced Search Database - Discovery Service for Academy of Nutrition and Dietetics. | 1,421 |
| S26 | TI (nutrition N2 (therapy or therapies)) OR AB (nutrition N2 (therapy or therapies))                   | Search modes - Boolean/Phrase | Interface - EBSCO Discovery Service Search Screen - Advanced Search Database - Discovery Service for Academy of Nutrition and Dietetics. | 1,995 |
| S25 | TI (nutrition N2 (guide* OR guidanc* or guiding)) OR AB (nutrition N2 (guide* OR guidanc* or guiding)) | Search modes - Boolean/Phrase | Interface - EBSCO Discovery Service Search Screen - Advanced Search Database - Discovery Service for Academy of Nutrition and Dietetics. | 1,538 |
| S24 | TI (food N2 (guide* OR guidanc* or guiding)) OR AB (food N2 (guide* OR guidanc* or guiding))           | Search modes - Boolean/Phrase | Interface - EBSCO Discovery Service Search Screen - Advanced Search Database - Discovery Service for Academy of Nutrition and Dietetics. | 1,509 |
| S23 | MH "Food+" AND ((MH "Decision Making+") OR (MH "Decision Making, Patient") )                           | Search modes - Boolean/Phrase | Interface - EBSCO Discovery Service Search Screen - Advanced Search Database - Discovery Service for Academy of Nutrition and Dietetics. | 2,054 |
| S22 | MH "Food+" AND MH "Choice Behavior"                                                                    | Search modes - Boolean/Phrase | Interface - EBSCO Discovery Service Search Screen - Advanced Search Database - Discovery Service for Academy of Nutrition and Dietetics. | 0     |
| S21 | TI (healthy meal*) or AB (healthy meal*)                                                               | Search modes - Boolean/Phrase | Interface - EBSCO Discovery Service Search Screen - Advanced Search Database - Discovery Service for Academy of Nutrition and Dietetics. | 1,116 |
| S20 | TI ((healthy or poor) N2 eating) OR AB ((healthy or poor) N2 eating)                                   | Search modes - Boolean/Phrase | Interface - EBSCO Discovery Service Search Screen - Advanced Search Database - Discovery Service for Academy of Nutrition and Dietetics. | 8,661 |

|     |                                                                                                                                                                                                                                                                           |                               |                                                                                                                                          |        |
|-----|---------------------------------------------------------------------------------------------------------------------------------------------------------------------------------------------------------------------------------------------------------------------------|-------------------------------|------------------------------------------------------------------------------------------------------------------------------------------|--------|
| S19 | TI (("soft drink" or "soft drinks" or ((sugar sweetened N2 (food or foods or beverage* or drink or drinks)) N2 (consum* or intake)) OR AB ("soft drink" or "soft drinks" or ((sugar sweetened N2 (food or foods or beverage* or drink or drinks)) N2 (consum* or intake)) | Search modes - Boolean/Phrase | Interface - EBSCO Discovery Service Search Screen - Advanced Search Database - Discovery Service for Academy of Nutrition and Dietetics. | 3,189  |
| S18 | TI ("lunch program" or "lunch programs" or "lunch programme" or "lunch programmes" or "school lunch*") OR AB ("lunch program" or "lunch programs" or "lunch programme" or "lunch programmes" or "school lunch*")                                                          | Search modes - Boolean/Phrase | Interface - EBSCO Discovery Service Search Screen - Advanced Search Database - Discovery Service for Academy of Nutrition and Dietetics. | 851    |
| S17 | TI (Recommended Dietary Allowance*) OR AB (Recommended Dietary Allowance*)                                                                                                                                                                                                | Search modes - Boolean/Phrase | Interface - EBSCO Discovery Service Search Screen - Advanced Search Database - Discovery Service for Academy of Nutrition and Dietetics. | 642    |
| S16 | TI (recommended daily allowance) OR AB (recommended daily allowance)                                                                                                                                                                                                      | Search modes - Boolean/Phrase | Interface - EBSCO Discovery Service Search Screen - Advanced Search Database - Discovery Service for Academy of Nutrition and Dietetics. | 277    |
| S15 | TI ((nutrition or food or foods) N2 (policy or policies or program* )) OR AB ((nutrition or food or foods) N2 (policy or policies or program* ))                                                                                                                          | Search modes - Boolean/Phrase | Interface - EBSCO Discovery Service Search Screen - Advanced Search Database - Discovery Service for Academy of Nutrition and Dietetics. | 7,744  |
| S14 | (MH "Recommended Dietary Allowances") OR (MH "Nutrition Policy") OR (MH "Nutritional Sciences")                                                                                                                                                                           | Search modes - Boolean/Phrase | Interface - EBSCO Discovery Service Search Screen - Advanced Search Database - Discovery Service for Academy of Nutrition and Dietetics. | 5,022  |
| S13 | (MH "Food Guide Pyramid") OR (MH "MyPlate") OR (MH                                                                                                                                                                                                                        | Search modes - Boolean/Phrase | Interface - EBSCO Discovery Service Search Screen - Advanced Search                                                                      | 12,022 |

|     |                                                                                                                                                                                                                                                                                                                                                                                                                      |                               |                                                                                                                                                |        |
|-----|----------------------------------------------------------------------------------------------------------------------------------------------------------------------------------------------------------------------------------------------------------------------------------------------------------------------------------------------------------------------------------------------------------------------|-------------------------------|------------------------------------------------------------------------------------------------------------------------------------------------|--------|
|     | "Nutritional Requirements") OR (MH "Dietary Reference Intakes") OR (MH "Nutritional Support Team") OR (MH "Nutrition Services")                                                                                                                                                                                                                                                                                      |                               | Database - Discovery Service for Academy of Nutrition and Dietetics.                                                                           |        |
| S12 | TI (food N2 Legislation) OR AB (food N2 Legislation)                                                                                                                                                                                                                                                                                                                                                                 | Search modes - Boolean/Phrase | Interface - EBSCO Discovery Service<br>Search Screen - Advanced Search<br>Database - Discovery Service for Academy of Nutrition and Dietetics. | 74     |
| S11 | TI ("Supplemental Nutrition Assistance Program" or "food stamps" or "food aid" or "snap program*" or "food assistance" OR "Special Supplemental Nutrition Program for Women" or "WIC program*") OR AB ("Supplemental Nutrition Assistance Program" or "food stamps" or "food stamps" or "food aid" or "snap program*" or "food assistance" OR "Special Supplemental Nutrition Program for Women" or "WIC program*")) | Search modes - Boolean/Phrase | Interface - EBSCO Discovery Service<br>Search Screen - Advanced Search<br>Database - Discovery Service for Academy of Nutrition and Dietetics. | 2,079  |
| S10 | (MH "Food Assistance")                                                                                                                                                                                                                                                                                                                                                                                               | Search modes - Boolean/Phrase | Interface - EBSCO Discovery Service<br>Search Screen - Advanced Search<br>Database - Discovery Service for Academy of Nutrition and Dietetics. | 1,914  |
| S9  | MH "Diet Therapy+"                                                                                                                                                                                                                                                                                                                                                                                                   | Search modes - Boolean/Phrase | Interface - EBSCO Discovery Service<br>Search Screen - Advanced Search<br>Database - Discovery Service for Academy of Nutrition and Dietetics. | 36,316 |
| S8  | TI (feeding behavior* or feeding behaviour*) or AB (feeding behavior* or feeding behaviour*)                                                                                                                                                                                                                                                                                                                         | Search modes - Boolean/Phrase | Interface - EBSCO Discovery Service<br>Search Screen - Advanced Search<br>Database - Discovery Service for Academy of Nutrition and Dietetics. | 1,918  |

|    |                                                                                                                                                                                                                                                                         |                               |                                                                                                                                                   |         |
|----|-------------------------------------------------------------------------------------------------------------------------------------------------------------------------------------------------------------------------------------------------------------------------|-------------------------------|---------------------------------------------------------------------------------------------------------------------------------------------------|---------|
| S7 | TI ((food or eating) N2 (behavior* or behaviour* or habit or habits or preference*)) OR AB ((food or eating) N2 (behavior* or behaviour* or habit or habits or preference*))                                                                                            | Search modes - Boolean/Phrase | Interface - EBSCO Discovery Service<br>Search Screen - Advanced Search<br>Database - Discovery Service for<br>Academy of Nutrition and Dietetics. | 15,748  |
| S6 | (MH "Fast Foods") OR TI ("fast food*" OR "junk food*" or "processed food*" or convenience food* or "ready to eat" or "ready prepared food*") OR AB ("fast food*" OR "junk food*" or "processed food*" or convenience food* or "ready to eat" or "ready prepared food*") | Search modes - Boolean/Phrase | Interface - EBSCO Discovery Service<br>Search Screen - Advanced Search<br>Database - Discovery Service for<br>Academy of Nutrition and Dietetics. | 6,729   |
| S5 | MH "Food Preferences" OR MH "Food Fussiness"                                                                                                                                                                                                                            | Search modes - Boolean/Phrase | Interface - EBSCO Discovery Service<br>Search Screen - Advanced Search<br>Database - Discovery Service for<br>Academy of Nutrition and Dietetics. | 7,684   |
| S4 | (MH "Eating Behavior+")                                                                                                                                                                                                                                                 | Search modes - Boolean/Phrase | Interface - EBSCO Discovery Service<br>Search Screen - Advanced Search<br>Database - Discovery Service for<br>Academy of Nutrition and Dietetics. | 49,680  |
| S3 | TI (energy intake or (calori* N2 (intake or restriction*)) OR portion size* or serving size*) OR AB (energy intake or (calori* N2 (intake or restriction*)) OR portion size* or serving size*)                                                                          | Search modes - Boolean/Phrase | Interface - EBSCO Discovery Service<br>Search Screen - Advanced Search<br>Database - Discovery Service for<br>Academy of Nutrition and Dietetics. | 18,582  |
| S2 | TI (diet*) or AB (diet*)                                                                                                                                                                                                                                                | Search modes - Boolean/Phrase | Interface - EBSCO Discovery Service<br>Search Screen - Advanced Search<br>Database - Discovery Service for<br>Academy of Nutrition and Dietetics. | 158,255 |
| S1 | (MH "Diet+") OR (MH "Dietitians") OR (MH "Dietetics") ) OR (MH                                                                                                                                                                                                          | Search modes - Boolean/Phrase | Interface - EBSCO Discovery Service<br>Search Screen - Advanced Search                                                                            | 146,212 |

|  |                                                             |  |                                                                         |  |
|--|-------------------------------------------------------------|--|-------------------------------------------------------------------------|--|
|  | "Nutritional Support Team") OR<br>(MH "Nutrition Services") |  | Database - Discovery Service for<br>Academy of Nutrition and Dietetics. |  |
|--|-------------------------------------------------------------|--|-------------------------------------------------------------------------|--|

Table S4. Food Science Source search for Systematic Reviews Examining Impact of Pediatric Obesity Interventions on June 8, 2023

|     |                                                                                                                                                                                                                                                                                            |                                                                                                                                       |                                                                                               |
|-----|--------------------------------------------------------------------------------------------------------------------------------------------------------------------------------------------------------------------------------------------------------------------------------------------|---------------------------------------------------------------------------------------------------------------------------------------|-----------------------------------------------------------------------------------------------|
| S39 | (S24 OR S25) AND S29 AND S36                                                                                                                                                                                                                                                               | <b>Limiters</b> - Publication Date: 20210101-20231231<br><b>Narrow by Language:</b> - english<br><b>Search modes</b> - Boolean/Phrase | <a href="#">View Results</a> (425)<br><a href="#">View Details</a><br><a href="#">Edit</a>    |
| S38 | (S24 OR S25) AND S29 AND S36                                                                                                                                                                                                                                                               | <b>Limiters</b> - Publication Date: 20210101-20231231<br><b>Search modes</b> - Boolean/Phrase                                         | <a href="#">View Results</a> (428)<br><a href="#">View Details</a><br><a href="#">Edit</a>    |
| S37 | (S24 OR S25) AND S29 AND S36                                                                                                                                                                                                                                                               | <b>Search modes</b> - Boolean/Phrase                                                                                                  | <a href="#">View Results</a> (1,498)<br><a href="#">View Details</a><br><a href="#">Edit</a>  |
| S36 | S30 OR S31 OR S32 OR S33 OR S34 OR S35                                                                                                                                                                                                                                                     | <b>Search modes</b> - Boolean/Phrase                                                                                                  | <a href="#">View Results</a> (51,155)<br><a href="#">View Details</a><br><a href="#">Edit</a> |
| S35 | AB (risk of bias or (newcastle N2 ottawa))                                                                                                                                                                                                                                                 | <b>Search modes</b> - Boolean/Phrase                                                                                                  | <a href="#">View Results</a> (3,724)<br><a href="#">View Details</a><br><a href="#">Edit</a>  |
| S34 | AB (data extraction or pubmed or medline or cinahl or scopus or embase)                                                                                                                                                                                                                    | <b>Search modes</b> - Boolean/Phrase                                                                                                  | <a href="#">View Results</a> (20,607)<br><a href="#">View Details</a><br><a href="#">Edit</a> |
| S33 | SO cochrane OR SO systematic review*                                                                                                                                                                                                                                                       | <b>Search modes</b> - Boolean/Phrase                                                                                                  | <a href="#">View Results</a> (0)<br><a href="#">View Details</a><br><a href="#">Edit</a>      |
| S32 | TI (metaanaly* or meta-analy*) OR AB (metaanaly* or meta-analy*) ) OR KW (metaanaly* or meta-analy*) OR ( TI (evidence N2 synthesi*) OR AB (evidence N2 synthesi*) ) OR ( TI (evidence N2 review) OR AB (evidence N2 review) ) OR KW (evidence N2 synthesi*) OR AB (evidence N2 synthesi*) | <b>Search modes</b> - Boolean/Phrase                                                                                                  | <a href="#">View Results</a> (27,581)<br><a href="#">View Details</a><br><a href="#">Edit</a> |



|     |                                                                                                                                                                                                                                                                                                                                                                                                                                                                                           |                                      |                                                                                                |
|-----|-------------------------------------------------------------------------------------------------------------------------------------------------------------------------------------------------------------------------------------------------------------------------------------------------------------------------------------------------------------------------------------------------------------------------------------------------------------------------------------------|--------------------------------------|------------------------------------------------------------------------------------------------|
| S31 | ( TI ((systematic or scoping or meta- or overview* or review) N2 review*) or AB ((systematic or scoping or meta- or overview*) N2 review*) )                                                                                                                                                                                                                                                                                                                                              | <b>Search modes</b> - Boolean/Phrase | <a href="#">View Results</a> (30,691)<br><a href="#">View Details</a><br><a href="#">Edit</a>  |
| S30 | ( (SU "Systematic Review") OR (SU "Scoping Review") ) OR ( (SU "Meta Analysis") OR (SU "Meta Synthesis") )                                                                                                                                                                                                                                                                                                                                                                                | <b>Search modes</b> - Boolean/Phrase | <a href="#">View Results</a> (12,069)<br><a href="#">View Details</a><br><a href="#">Edit</a>  |
| S29 | S26 OR S27 OR S28                                                                                                                                                                                                                                                                                                                                                                                                                                                                         | <b>Search modes</b> - Boolean/Phrase | <a href="#">View Results</a> (157,284)<br><a href="#">View Details</a><br><a href="#">Edit</a> |
| S28 | TI pediatric* OR AB pediatric* OR KW pediatric* OR TI Paediatric* OR AB paediatric* OR KW Paediatric*                                                                                                                                                                                                                                                                                                                                                                                     | <b>Search modes</b> - Boolean/Phrase | <a href="#">View Results</a> (21,494)<br><a href="#">View Details</a><br><a href="#">Edit</a>  |
| S27 | TI (preschool* or pre-school* or highschool* or middle school* or kindergar* or kintergar* or play school or play schools or playschool* or "after school") OR AB (preschool* or pre-school* or highschool* or middle school* or kindergar* or kintergar* or play school or play schools or playschool* or "after school") OR KW (preschool* or pre-school* or highschool* or middle school* or kindergar* or kintergar* or play school or play schools or playschool* or "after school") | <b>Search modes</b> - Boolean/Phrase | <a href="#">View Results</a> (7,358)<br><a href="#">View Details</a><br><a href="#">Edit</a>   |
| S26 | TI (child or childs or children or child's or childhood or teen* or adolescent* or adolescence) ) OR ( AB (child or childs or children or child's or childhood or teen* or                                                                                                                                                                                                                                                                                                                | <b>Search modes</b> - Boolean/Phrase | <a href="#">View Results</a> (149,665)<br><a href="#">View Details</a><br><a href="#">Edit</a> |

|     |                                                                                                                                                                                                                                                                                                                                                        |                                      |                                                                                                |
|-----|--------------------------------------------------------------------------------------------------------------------------------------------------------------------------------------------------------------------------------------------------------------------------------------------------------------------------------------------------------|--------------------------------------|------------------------------------------------------------------------------------------------|
|     | adolescent* or adolescence) ) OR KW (child or childs or children or child's or childhood or teen* or adolescent* or adolescence) OR SU (child or childs or children or child's or childhood or teen* or adolescent* or adolescence)                                                                                                                    |                                      |                                                                                                |
| S25 | ( TI (nutrition N2 (guide* OR guidanc* or guiding)) OR AB (nutrition N2 (guide* OR guidanc* or guiding)) OR KW (nutrition N2 (guide* OR guidanc* or guiding)) ) OR ( TI (food N2 (choice* OR guide* OR guidanc* or guiding)) OR AB (food N2 (choice* OR guide* OR guidanc* or guiding)) OR KW (food N2 (choice* OR guide* OR guidanc* or guiding)) ) ) | <b>Search modes</b> - Boolean/Phrase | <a href="#">View Results</a> (7,617)<br><a href="#">View Details</a><br><a href="#">Edit</a>   |
| S24 | S1 OR S2 OR S3 OR S4 OR S5 OR S6 OR S7 OR S8 OR S9 OR S10 OR S11 OR S12 OR S13 OR S14 OR S15 OR S16 OR S17 OR S18 OR S19 OR S20 OR S21 OR S22 OR S23                                                                                                                                                                                                   | <b>Search modes</b> - Boolean/Phrase | <a href="#">View Results</a> (240,072)<br><a href="#">View Details</a><br><a href="#">Edit</a> |
| S23 | TI (nutrition N2 (counsel* or advice or advis*)) OR AB (nutrition N2 (counsel* or advice or advis*)) OR KW (nutrition N2 (counsel* or advice or advis*))                                                                                                                                                                                               | <b>Search modes</b> - Boolean/Phrase | <a href="#">View Results</a> (917)<br><a href="#">View Details</a><br><a href="#">Edit</a>     |
| S22 | TI (nutrition N2 (therapy or therapies)) OR AB (nutrition N2 (therapy or therapies)) OR KW (nutrition N2 (therapy or therapies))                                                                                                                                                                                                                       | <b>Search modes</b> - Boolean/Phrase | <a href="#">View Results</a> (865)<br><a href="#">View Details</a><br><a href="#">Edit</a>     |
| S21 | SU Food AND SU decision making                                                                                                                                                                                                                                                                                                                         | <b>Search modes</b> - Boolean/Phrase | <a href="#">View Results</a> (839)<br><a href="#">View Details</a>                             |

|     |                                                                                                                                                                                                                                                                                                                                                                                                                   |                                      |                                                                                              |
|-----|-------------------------------------------------------------------------------------------------------------------------------------------------------------------------------------------------------------------------------------------------------------------------------------------------------------------------------------------------------------------------------------------------------------------|--------------------------------------|----------------------------------------------------------------------------------------------|
|     |                                                                                                                                                                                                                                                                                                                                                                                                                   |                                      | <a href="#">Edit</a>                                                                         |
| S20 | SU Food AND SU Choice                                                                                                                                                                                                                                                                                                                                                                                             | <b>Search modes</b> - Boolean/Phrase | <a href="#">View Results</a> (235)<br><a href="#">View Details</a><br><a href="#">Edit</a>   |
| S19 | TI (healthy meal*) or AB (healthy meal*) OR KW (healthy meal*)                                                                                                                                                                                                                                                                                                                                                    | <b>Search modes</b> - Boolean/Phrase | <a href="#">View Results</a> (1,243)<br><a href="#">View Details</a><br><a href="#">Edit</a> |
| S18 | TI ((healthy or poor) N2 eating) OR AB ((healthy or poor) N2 eating) OR KW ((healthy or poor) N2 eating)                                                                                                                                                                                                                                                                                                          | <b>Search modes</b> - Boolean/Phrase | <a href="#">View Results</a> (6,023)<br><a href="#">View Details</a><br><a href="#">Edit</a> |
| S17 | TI (("soft drink" or "soft drinks" or ((sugar sweetened N2 (food or foods or beverage* or drink or drinks)) N2 (consum* or intake)) OR AB (("soft drink" or "soft drinks" or ((sugar sweetened N2 (food or foods or beverage* or drink or drinks)) N2 (consum* or intake)) OR KW (("soft drink" or "soft drinks" or ((sugar sweetened N2 (food or foods or beverage* or drink or drinks)) N2 (consum* or intake)) | <b>Search modes</b> - Boolean/Phrase | <a href="#">View Results</a> (9,273)<br><a href="#">View Details</a><br><a href="#">Edit</a> |
| S16 | TI ("lunch program" or "lunch programs" or "lunch programme" or "lunch programmes" or "school lunch*") OR AB ("lunch program" or "lunch programs" or "lunch programme" or "lunch programmes" or "school lunch*") OR KW ("lunch program" or "lunch programs" or "lunch programme" or "lunch programmes" or "school lunch*")                                                                                        | <b>Search modes</b> - Boolean/Phrase | <a href="#">View Results</a> (1,520)<br><a href="#">View Details</a><br><a href="#">Edit</a> |

|     |                                                                                                                                                                                                                            |                                      |                                                                                               |
|-----|----------------------------------------------------------------------------------------------------------------------------------------------------------------------------------------------------------------------------|--------------------------------------|-----------------------------------------------------------------------------------------------|
| S15 | TI (Recommended Dietary Allowance*) OR AB (Recommended Dietary Allowance*) OR KW (Recommended Dietary Allowance*)                                                                                                          | <b>Search modes</b> - Boolean/Phrase | <a href="#">View Results</a> (925)<br><a href="#">View Details</a><br><a href="#">Edit</a>    |
| S14 | TI (recommended daily allowance) OR AB (recommended daily allowance) OR KW (recommended daily allowance)                                                                                                                   | <b>Search modes</b> - Boolean/Phrase | <a href="#">View Results</a> (352)<br><a href="#">View Details</a><br><a href="#">Edit</a>    |
| S13 | TI ((nutrition or food or foods) N2 (policy or policies or program* )) OR AB ((nutrition or food or foods) N2 (policy or policies or program* )) OR KW ((nutrition or food or foods) N2 (policy or policies or program* )) | <b>Search modes</b> - Boolean/Phrase | <a href="#">View Results</a> (12,281)<br><a href="#">View Details</a><br><a href="#">Edit</a> |
| S12 | (SU Recommended Dietary Allowance* ) OR (SU Nutrition Polic*) OR (SU Nutrition* Science*)                                                                                                                                  | <b>Search modes</b> - Boolean/Phrase | <a href="#">View Results</a> (3,617)<br><a href="#">View Details</a><br><a href="#">Edit</a>  |
| S11 | (SU "Food Guide Pyramid") OR (SU "MyPlate") OR (SU "Nutritional Requirements") OR (SU "Dietary Reference Intakes") OR (SU "Nutritional Support Team") OR (SU "Nutrition Services")                                         | <b>Search modes</b> - Boolean/Phrase | <a href="#">View Results</a> (9,726)<br><a href="#">View Details</a><br><a href="#">Edit</a>  |
| S10 | TI (food N2 Legislation) OR AB (food N2 Legislation) OR KW (food N2 Legislation)                                                                                                                                           | <b>Search modes</b> - Boolean/Phrase | <a href="#">View Results</a> (638)<br><a href="#">View Details</a><br><a href="#">Edit</a>    |
| S9  | TI ("Supplemental Nutrition Assistance Program" or "food stamps" or "food aid" or "snap                                                                                                                                    | <b>Search modes</b> - Boolean/Phrase | <a href="#">View Results</a> (2,611)<br><a href="#">View Details</a><br><a href="#">Edit</a>  |

|    |                                                                                                                                                                                                                                                                                                                                                                                                                                  |                                      |                                                                                               |
|----|----------------------------------------------------------------------------------------------------------------------------------------------------------------------------------------------------------------------------------------------------------------------------------------------------------------------------------------------------------------------------------------------------------------------------------|--------------------------------------|-----------------------------------------------------------------------------------------------|
|    | program*" or "food assistance" OR "Special Supplemental Nutrition Program for Women" or "WIC program*") OR AB ("Supplemental Nutrition Assistance Program" or "food stamps" or "food stamps" or "food aid" or "snap program*" or "food assistance" OR "Special Supplemental Nutrition Program for Women" or "WIC program*")) OR KW ("Supplemental Nutrition Assistance Program" or "food stamps" or "food stamps" or "food a ... |                                      |                                                                                               |
| S8 | (SU "Food Assistance")                                                                                                                                                                                                                                                                                                                                                                                                           | <b>Search modes</b> - Boolean/Phrase | <a href="#">View Results</a> (1)<br><a href="#">View Details</a><br><a href="#">Edit</a>      |
| S7 | TI (feeding behavior* or feeding behaviour*) or AB (feeding behavior* or feeding behaviour*) OR KW (feeding behavior* or feeding behaviour*)                                                                                                                                                                                                                                                                                     | <b>Search modes</b> - Boolean/Phrase | <a href="#">View Results</a> (3,087)<br><a href="#">View Details</a><br><a href="#">Edit</a>  |
| S6 | TI ((food or eating) N2 (behavior* or behaviour* or habit or habits or preference*)) OR AB ((food or eating) N2 (behavior* or behaviour* or habit or habits or preference*)) OR KW ((food or eating) N2 (behavior* or behaviour* or habit or habits or preference*))                                                                                                                                                             | <b>Search modes</b> - Boolean/Phrase | <a href="#">View Results</a> (12,794)<br><a href="#">View Details</a><br><a href="#">Edit</a> |
| S5 | SU Food Preference* OR SU Food Fussiness                                                                                                                                                                                                                                                                                                                                                                                         | <b>Search modes</b> - Boolean/Phrase | <a href="#">View Results</a> (3,825)<br><a href="#">View Details</a><br><a href="#">Edit</a>  |

|    |                                                                                                                                                                                                                                                                                                 |                                      |                                                                                                |
|----|-------------------------------------------------------------------------------------------------------------------------------------------------------------------------------------------------------------------------------------------------------------------------------------------------|--------------------------------------|------------------------------------------------------------------------------------------------|
| S4 | SU Food Preference* OR SU Food Fussiness                                                                                                                                                                                                                                                        | <b>Search modes</b> - Boolean/Phrase | <a href="#">View Results</a> (3,825)<br><a href="#">View Details</a><br><a href="#">Edit</a>   |
| S3 | SU Eating Behavior*                                                                                                                                                                                                                                                                             | <b>Search modes</b> - Boolean/Phrase | <a href="#">View Results</a> (9)<br><a href="#">View Details</a><br><a href="#">Edit</a>       |
| S2 | TI (energy intake or (calori* N2 (intake or restriction*)) OR portion size* or serving size*) OR AB (energy intake or (calori* N2 (intake or restriction*)) OR portion size* or serving size*) OR KW (energy intake or (calori* N2 (intake or restriction*)) OR portion size* or serving size*) | <b>Search modes</b> - Boolean/Phrase | <a href="#">View Results</a> (17,839)<br><a href="#">View Details</a><br><a href="#">Edit</a>  |
| S1 | TI (diet*) or AB (diet*) OR KW diet* OR SU diet*                                                                                                                                                                                                                                                | <b>Search modes</b> - Boolean/Phrase | <a href="#">View Results</a> (199,668)<br><a href="#">View Details</a><br><a href="#">Edit</a> |

Table S5. Cochrane Database of Systematic Reviews search for Systematic Reviews Examining Impact of Pediatric Obesity Interventions on June 8, 2023

|     |                                                                                                                                                                                                                                                                                                                                                           |                                                                                                        |                                                                                              |
|-----|-----------------------------------------------------------------------------------------------------------------------------------------------------------------------------------------------------------------------------------------------------------------------------------------------------------------------------------------------------------|--------------------------------------------------------------------------------------------------------|----------------------------------------------------------------------------------------------|
| S32 | S23 AND S30                                                                                                                                                                                                                                                                                                                                               | <b>Limiters</b> - Year of Publication -- Reviews:<br>2021-2023<br><b>Search modes</b> - Boolean/Phrase | <a href="#">View Results</a> (16)<br><a href="#">View Details</a><br><a href="#">Edit</a>    |
| S31 | S23 AND S30                                                                                                                                                                                                                                                                                                                                               | <b>Search modes</b> - Boolean/Phrase                                                                   | <a href="#">View Results</a> (452)<br><a href="#">View Details</a><br><a href="#">Edit</a>   |
| S30 | S24 OR S25 OR S26 OR<br>S27 OR S28 OR S29                                                                                                                                                                                                                                                                                                                 | <b>Search modes</b> - Boolean/Phrase                                                                   | <a href="#">View Results</a> (2,680)<br><a href="#">View Details</a><br><a href="#">Edit</a> |
| S29 | TI paediatric* or AB<br>paediatric*                                                                                                                                                                                                                                                                                                                       | <b>Search modes</b> - Boolean/Phrase                                                                   | <a href="#">View Results</a> (269)<br><a href="#">View Details</a><br><a href="#">Edit</a>   |
| S28 | TI (pediatric*) OR AB<br>pediatric*                                                                                                                                                                                                                                                                                                                       | <b>Search modes</b> - Boolean/Phrase                                                                   | <a href="#">View Results</a> (138)<br><a href="#">View Details</a><br><a href="#">Edit</a>   |
| S27 | MW (pediatric*)                                                                                                                                                                                                                                                                                                                                           | <b>Search modes</b> - Boolean/Phrase                                                                   | <a href="#">View Results</a> (18)<br><a href="#">View Details</a><br><a href="#">Edit</a>    |
| S26 | TI (preschool* or pre-school*<br>or highschool* or middle<br>school* or kindergar* or<br>kintergar* or play school or<br>play schools or playschool*<br>or "after school") OR AB<br>(preschool* or pre- school* or<br>highschool* or middle school*<br>or kindergar* or kintergar* or<br>play school or play schools or<br>playschool* or "after school") | <b>Search modes</b> - Boolean/Phrase                                                                   | <a href="#">View Results</a> (57)<br><a href="#">View Details</a><br><a href="#">Edit</a>    |
| S25 | ( TI (child or child's or children<br>or child's or childhood or                                                                                                                                                                                                                                                                                          | <b>Search modes</b> - Boolean/Phrase                                                                   | <a href="#">View Results</a> (2,405)<br><a href="#">View Details</a>                         |

|     |                                                                                                                                               |                                           |                                                                                              |
|-----|-----------------------------------------------------------------------------------------------------------------------------------------------|-------------------------------------------|----------------------------------------------------------------------------------------------|
|     | teen* or adolescent* or adolescence) ) OR ( AB (child or childs or children or child's or childhood or teen* or adolescent* or adolescence) ) |                                           | <a href="#">Edit</a>                                                                         |
| S24 | (MW "Child") OR (MW "Adolescent")                                                                                                             | <b>Search modes</b> - Boolean/Phrase      | <a href="#">View Results</a> (1,501)<br><a href="#">View Details</a><br><a href="#">Edit</a> |
| S23 | S1 OR S2 OR S3 OR S4 OR S5 OR S6 OR S7 OR S8 OR S9 OR S10 OR S11 OR S12 OR S13 OR S14 OR S15 OR S16 OR S17 OR S18 OR S19 OR S21 OR S22        | <b>Search modes</b> - Boolean/Phrase      | <a href="#">View Results</a> (1,265)<br><a href="#">View Details</a><br><a href="#">Edit</a> |
| S22 | TI (nutrition) OR AB (nutrition)                                                                                                              | <b>Search modes</b> - Boolean/Phrase      | <a href="#">View Results</a> (240)<br><a href="#">View Details</a><br><a href="#">Edit</a>   |
| S21 | TI (food or foods or eating) OR AB (food or foods or eating)                                                                                  | <b>Search modes</b> - Boolean/Phrase      | <a href="#">View Results</a> (554)<br><a href="#">View Details</a><br><a href="#">Edit</a>   |
| S20 | TI (food N2 (guide* OR guidanc* or guiding)) OR AB (food N2 (guide* OR guidanc* or guiding))                                                  | <b>Search modes</b> - Boolean/Phrase      | <a href="#">View Results</a> (1)<br><a href="#">View Details</a><br><a href="#">Edit</a>     |
| S19 | MW "Food" AND MW "Decision Making"                                                                                                            | <b>Search modes</b> - SmartText Searching | <a href="#">View Results</a> (1)<br><a href="#">View Details</a><br><a href="#">Edit</a>     |
| S18 | MW "Food+" AND MW "Choice Behavior"                                                                                                           | <b>Search modes</b> - SmartText Searching | <a href="#">View Results</a> (1)<br><a href="#">View Details</a><br><a href="#">Edit</a>     |
| S17 | TI (healthy meal*) or AB (healthy meal*)                                                                                                      | <b>Search modes</b> - SmartText Searching | <a href="#">View Results</a> (1)<br><a href="#">View Details</a><br><a href="#">Edit</a>     |



|     |                                                                                                                                                                                                                                                                            |                                      |                                                                                           |
|-----|----------------------------------------------------------------------------------------------------------------------------------------------------------------------------------------------------------------------------------------------------------------------------|--------------------------------------|-------------------------------------------------------------------------------------------|
| S16 | TI ((healthy or poor) N2 eating) OR AB ((healthy or poor) N2 eating)                                                                                                                                                                                                       | <b>Search modes</b> - Boolean/Phrase | <a href="#">View Results</a> (18)<br><a href="#">View Details</a><br><a href="#">Edit</a> |
| S15 | TI (("soft drink" or "soft drinks" or ((sugar sweetened N2 (food or foods or beverage* or drink or drinks)) N2 (consum* or intake)) OR AB (("soft drink" or "soft drinks" or ((sugar sweetened N2 (food or foods or beverage* or drink or drinks)) N2 (consum* or intake)) | <b>Search modes</b> - Boolean/Phrase | <a href="#">View Results</a> (4)<br><a href="#">View Details</a><br><a href="#">Edit</a>  |
| S14 | TI ("lunch program" or "lunch programs" or "lunch programme" or "lunch programmes" or "school lunch*") OR AB ("lunch program" or "lunch programs" or "lunch programme" or "lunch programmes" or "school lunch*")                                                           | <b>Search modes</b> - Boolean/Phrase | <a href="#">View Results</a> (1)<br><a href="#">View Details</a><br><a href="#">Edit</a>  |
| S13 | TI (Recommended Dietary Allowance*) OR AB (Recommended Dietary Allowance*)                                                                                                                                                                                                 | <b>Search modes</b> - Boolean/Phrase | <a href="#">View Results</a> (1)<br><a href="#">View Details</a><br><a href="#">Edit</a>  |
| S12 | TI (recommended daily allowance) OR AB (recommended daily allowance)                                                                                                                                                                                                       | <b>Search modes</b> - Boolean/Phrase | <a href="#">View Results</a> (3)<br><a href="#">View Details</a><br><a href="#">Edit</a>  |
| S11 | (MW "Recommended Dietary Allowances") OR (MW "Nutrition Policy") OR (MW "Nutritional Sciences")                                                                                                                                                                            | <b>Search modes</b> - Boolean/Phrase | <a href="#">View Results</a> (3)<br><a href="#">View Details</a><br><a href="#">Edit</a>  |

|     |                                                                                                                                                                                                                                                                                                                                                                                                                      |                                           |                                                                                          |
|-----|----------------------------------------------------------------------------------------------------------------------------------------------------------------------------------------------------------------------------------------------------------------------------------------------------------------------------------------------------------------------------------------------------------------------|-------------------------------------------|------------------------------------------------------------------------------------------|
| S10 | MW "Nutrition Surveys" OR MW "Diet Surveys"                                                                                                                                                                                                                                                                                                                                                                          | <b>Search modes</b> - SmartText Searching | <a href="#">View Results</a> (0)<br><a href="#">View Details</a><br><a href="#">Edit</a> |
| S9  | TI ("Supplemental Nutrition Assistance Program" or "food stamps" or "food aid" or "snap program*" or "food assistance" OR "Special Supplemental Nutrition Program for Women" or "WIC program*") OR AB ("Supplemental Nutrition Assistance Program" or "food stamps" or "food stamps" or "food aid" or "snap program*" or "food assistance" OR "Special Supplemental Nutrition Program for Women" or "WIC program*")) | <b>Search modes</b> - Boolean/Phrase      | <a href="#">View Results</a> (1)<br><a href="#">View Details</a><br><a href="#">Edit</a> |
| S8  | (MW "Legislation, Food") OR (MW "Food Assistance")                                                                                                                                                                                                                                                                                                                                                                   | <b>Search modes</b> - Boolean/Phrase      | <a href="#">View Results</a> (1)<br><a href="#">View Details</a><br><a href="#">Edit</a> |
| S7  | TI (feeding behavior* or feeding behaviour*) or AB (feeding behavior* or feeding behaviour*)                                                                                                                                                                                                                                                                                                                         | <b>Search modes</b> - Boolean/Phrase      | <a href="#">View Results</a> (3)<br><a href="#">View Details</a><br><a href="#">Edit</a> |
| S6  | (MW "Fast Foods") OR TI ("fast food*" OR "junk food*" or "processed food*" or convenience food* or "ready to eat" or "ready prepared food*") OR AB ("fast food*" OR "junk food*" or "processed food*" or convenience food* or "ready                                                                                                                                                                                 | <b>Search modes</b> - Boolean/Phrase      | <a href="#">View Results</a> (6)<br><a href="#">View Details</a><br><a href="#">Edit</a> |

|    |                                                                                                                                                                                                |                                      |                                                                                            |
|----|------------------------------------------------------------------------------------------------------------------------------------------------------------------------------------------------|--------------------------------------|--------------------------------------------------------------------------------------------|
|    | to eat" or "ready prepared food*")                                                                                                                                                             |                                      |                                                                                            |
| S5 | MW "Food Preferences" OR MW "Food Fussiness"                                                                                                                                                   | <b>Search modes</b> - Boolean/Phrase | <a href="#">View Results</a> (1)<br><a href="#">View Details</a><br><a href="#">Edit</a>   |
| S4 | MW "Feeding Behavior"                                                                                                                                                                          | <b>Search modes</b> - Boolean/Phrase | <a href="#">View Results</a> (8)<br><a href="#">View Details</a><br><a href="#">Edit</a>   |
| S3 | TI (energy intake or (calori* N2 (intake or restriction*)) OR portion size* or serving size*) OR AB (energy intake or (calori* N2 (intake or restriction*)) OR portion size* or serving size*) | <b>Search modes</b> - Boolean/Phrase | <a href="#">View Results</a> (51)<br><a href="#">View Details</a><br><a href="#">Edit</a>  |
| S2 | TI (diet* or nutrition*) or AB (diet* or nutrition*)                                                                                                                                           | <b>Search modes</b> - Boolean/Phrase | <a href="#">View Results</a> (809)<br><a href="#">View Details</a><br><a href="#">Edit</a> |
| S1 | MW (Diet* OR Nutrition*)                                                                                                                                                                       | <b>Search modes</b> - Boolean/Phrase | <a href="#">View Results</a> (401)<br><a href="#">View Details</a><br><a href="#">Edit</a> |

Table S6. List of Articles During Full-Text Review of the Umbrella Review Examining Impact of Pediatric Obesity Prevention Interventions

| Articles                                                                                                                                                                                                                                                                                                                       | Reason for Exclusion                           |
|--------------------------------------------------------------------------------------------------------------------------------------------------------------------------------------------------------------------------------------------------------------------------------------------------------------------------------|------------------------------------------------|
| 1. Acosta A, Streett S, Kroh MD, et al. White Paper AGA: POWER - Practice Guide on Obesity and Weight Management, Education, and Resources. <i>Clin Gastroenterol Hepatol</i> . 2017;15(5):631-649 e610. PMID: 28242319                                                                                                        | Population                                     |
| 2. Adeyemo M. Nurse Practitioners' Guide on Consumption of Hundred Percent Fruit Juice by Children. <i>Walden Dissertations and Doctoral Studies</i> . 2017.                                                                                                                                                                   | Study Design                                   |
| 3. Agaronov A, Ash T, Sepulveda M, Taveras EM, Davison KK. Inclusion of Sleep Promotion in Family-Based Interventions To Prevent Childhood Obesity. <i>Child Obes</i> . 2018;14(8):485-500. PMID: 30109955                                                                                                                     | No nutrition intervention of interest          |
| 4. Agnoli C, Baroni L, Bertini I, et al. Position paper on vegetarian diets from the working group of the Italian Society of Human Nutrition. <i>Nutr Metab Cardiovasc Dis</i> . 2017;27(12):1037-1052. PMID: 29174030                                                                                                         | Study Design                                   |
| 5. Akbarzadeh ZN, Mojgan; Hovsepian, Silva; Kelishadi, Roya. Dietary Patterns and Metabolic Syndrome in Children and Adolescents: A Systematic Review. <i>Journal of Pediatrics Review</i> . 2018;6(2):1-13. DOI: 10.5812/jpr.11656                                                                                            | Outcome                                        |
| 6. Akuno MH, Nocella G, Milia EP, Gutierrez L. Factors influencing the relationship between fluoride in drinking water and dental fluorosis: a ten-year systematic review and meta-analysis. <i>J Water Health</i> . 2019;17(6):845-862. PMID: 31850893                                                                        | SR does not have 2 databases or ROB assessment |
| 7. Albert Perez E, Mateu Olivares V, Martinez-Espinosa RM, Molina Vila MD, Reig Garcia-Galbis M. New Insights about How to Make an Intervention in Children and Adolescents with Metabolic Syndrome: Diet, Exercise vs. Changes in Body Composition. A Systematic Review of RCT. <i>Nutrients</i> . 2018;10(7). PMID: 29986479 | SR does not have 2 databases or ROB assessment |
| 8. Alcantara CM, Silva ANS, Pinheiro P, Queiroz MVO. Digital technologies for promotion of healthy eating habits in teenagers. <i>Rev Bras Enferm</i> . 2019;72(2):513-520. PMID: 31017217                                                                                                                                     | SR does not have 2 databases or ROB assessment |
| 9. Al-Khudairy L, Loveman E, Colquitt JL, et al. Diet, physical activity and behavioural interventions for the treatment of overweight or obese adolescents aged 12 to 17 years. <i>Cochrane Database Syst Rev</i> . 2017;6:CD012691. PMID: 28639320                                                                           | Population                                     |
| 10. Alston L, Partridge SR. Limited dietary interventions in rural Australian communities: A systematic review. <i>Nutr Diet</i> . 2021;78(1):57-68. PMID: 32160401                                                                                                                                                            | Outcome                                        |

| Articles                                                                                                                                                                                                                                                                                  | Reason for Exclusion                           |
|-------------------------------------------------------------------------------------------------------------------------------------------------------------------------------------------------------------------------------------------------------------------------------------------|------------------------------------------------|
| 11. An R, Nickols-Richardson SM, Khan N, Liu J, Liu R, Clarke C. Impact of Beef and Beef Product Intake on Cognition in Children and Young Adults: A Systematic Review. <i>Nutrients</i> . 2019;11(8). PMID: 31382632                                                                     | Outcome                                        |
| 12. Andela S, Burrows TL, Baur LA, Coyle DH, Collins CE, Gow ML. Efficacy of very low-energy diet programs for weight loss: A systematic review with meta-analysis of intervention studies in children and adolescents with obesity. <i>Obes Rev</i> . 2019;20(6):871-882. PMID: 30734459 | Population                                     |
| 13. Angawi K, Gaissi A. Systematic Review of Setting-Based Interventions for Preventing Childhood Obesity. <i>Biomed Res Int</i> . 2021;2021:4477534.                                                                                                                                     | SR does not have 2 databases or ROB assessment |
| 14. Andrade J, Lotton J, Andrade J. Systematic Review: Frameworks Used in School-Based Interventions, the Impact on Hispanic Children's Obesity-Related Outcomes. <i>J Sch Health</i> . 2018;88(11):847-858. PMID: 30300932                                                               | Population                                     |
| 15. Appleton KM, Hemingway A, Rajska J, Hartwell H. Repeated exposure and conditioning strategies for increasing vegetable liking and intake: systematic review and meta-analyses of the published literature. <i>Am J Clin Nutr</i> . 2018;108(4):842-856. PMID: 30321277                | Outcome                                        |
| 16. Appleton KM, Tuorila H, Bertenshaw EJ, de Graaf C, Mela DJ. Sweet taste exposure and the subsequent acceptance and preference for sweet taste in the diet: systematic review of the published literature. <i>Am J Clin Nutr</i> . 2018;107(3):405-419. PMID: 29566187                 | Outcome                                        |
| 17. Arango-Angarita A, Rodriguez-Ramirez S, Serra-Majem L, Shamah-Levy T. Dietary Energy Density and Its Association with Overweight or Obesity in Adolescents: A Systematic Review of Observational Studies. <i>Nutrients</i> . 2018;10(11). PMID: 30388849                              | Study Design                                   |
| 18. Arslanian S, Bacha F, Grey M, Marcus MD, White NH, Zeitler P. Evaluation and Management of Youth-Onset Type 2 Diabetes: A Position Statement by the American Diabetes Association. <i>Diabetes Care</i> . 2018;41(12):2648-2668. PMID: 30425094                                       | Population                                     |
| 19. Ash T, Agaronov A, Young T, Aftosmes-Tobio A, Davison KK. Family-based childhood obesity prevention interventions: a systematic review and quantitative content analysis. <i>Int J Behav Nutr Phys Act</i> . 2017;14(1):113. PMID: 28836983                                           | SR does not have 2 databases or ROB assessment |
| 20. Auerbach BJ, Wolf FM, Hikida A, et al. Fruit Juice and Change in BMI: A Meta-analysis. <i>Pediatrics</i> . 2017;139(4). PMID: 28336576                                                                                                                                                | Study Design                                   |
| 21. Avery A, Anderson C, McCullough F. Associations between children's diet quality and watching television during meal or snack consumption: A systematic review. <i>Matern Child Nutr</i> . 2017;13(4). PMID: 28211230                                                                  | No nutrition intervention of interest          |

| Articles                                                                                                                                                                                                                                                                                               | Reason for Exclusion                  |
|--------------------------------------------------------------------------------------------------------------------------------------------------------------------------------------------------------------------------------------------------------------------------------------------------------|---------------------------------------|
| 22. Bagherniya M, Taghipour A, Sharma M, et al. Obesity intervention programs among adolescents using social cognitive theory: a systematic literature review. <i>Health Educ Res.</i> 2018;33(1):26-39. PMID: 29293954                                                                                | Population                            |
| 23. Bahia L, Schaan CW, Sparrenberger K, et al. Overview of meta-analysis on prevention and treatment of childhood obesity. <i>J Pediatr (Rio J).</i> 2019;95(4):385-400. PMID: 30121174                                                                                                               | Population                            |
| 24. Bailey CJ, Drummond MJ, Ward PR. Food literacy programmes in secondary schools: a systematic literature review and narrative synthesis of quantitative and qualitative evidence. <i>Public Health Nutr.</i> 2019;22(15):2891-2913. PMID: 31290384                                                  | Outcome                               |
| 25. Baker-Smith CM, de Ferranti SD, Cochran WJ, Committee On Nutrition SOGH, Nutrition. The Use of Nonnutritive Sweeteners in Children. <i>Pediatrics.</i> 2019;144(5). PMID: 31659005                                                                                                                 | Study Design                          |
| 26. Baroni L, Goggi S, Battaglino R, et al. Vegan Nutrition for Mothers and Children: Practical Tools for Healthcare Providers. <i>Nutrients.</i> 2018;11(1). PMID: 30577451                                                                                                                           | Study Design                          |
| 27. Bates CR, Buscemi J, Nicholson LM, Cory M, Jagpal A, Bohnert AM. Links between the organization of the family home environment and child obesity: a systematic review. <i>Obes Rev.</i> 2018;19(5):716-727. PMID: 29520946                                                                         | No nutrition intervention of interest |
| 28. Beckers D, Karssen LT, Vink JM, Burk WJ, Larsen JK. Food parenting practices and children's weight outcomes: A systematic review of prospective studies. <i>Appetite.</i> 2021;158:105010. PMID: 33075443                                                                                          | No nutrition intervention of interest |
| 29. Behrman P, Demirci J, Yanez B, Beharie N, Laroche H. Society of Behavioral Medicine (SBM) position statement: SBM urges Congress to preserve and increase the financing of federally funded nutrition assistance programs and services. <i>Transl Behav Med.</i> 2019;9(1):170-174. PMID: 29726980 | Study Design                          |
| 30. Benjamin-Neelon SE. Position of the Academy of Nutrition and Dietetics: Benchmarks for Nutrition in Child Care. <i>J Acad Nutr Diet.</i> 2018;118(7):1291-1300. PMID: 29937055                                                                                                                     | Study Design                          |
| 31. Black AP, D'Onise K, McDermott R, Vally H, O'Dea K. How effective are family-based and institutional nutrition interventions in improving children's diet and health? A systematic review. <i>BMC Public Health.</i> 2017;17(1):818. PMID: 29041899                                                | Outcome                               |
| 32. Blaine RE, Kachurak A, Davison KK, Klabunde R, Fisher JO. Food parenting and child snacking: a systematic review. <i>Int J Behav Nutr Phys Act.</i> 2017;14(1):146. PMID: 29096640                                                                                                                 | Outcome                               |

| Articles                                                                                                                                                                                                                                                           | Reason for Exclusion                             |
|--------------------------------------------------------------------------------------------------------------------------------------------------------------------------------------------------------------------------------------------------------------------|--------------------------------------------------|
| 33. Bleich SN, Vercammen KA. The negative impact of sugar-sweetened beverages on children's health: an update of the literature. <i>BMC Obes.</i> 2018;5:6. PMID: 29484192                                                                                         | SR does not have 2 databases or ROB assessment   |
| 34. Bleich SN, Vercammen KA, Zatz LY, Frelrier JM, Ebbeling CB, Peeters A. Interventions to prevent global childhood overweight and obesity: a systematic review. <i>Lancet Diabetes Endocrinol.</i> 2018;6(4):332-346.                                            | No meta-analysis or graded certainty of evidence |
| 35. Boff RM, Liboni RPA, Batista IPA, de Souza LH, Oliveira MDS. Weight loss interventions for overweight and obese adolescents: a systematic review. <i>Eat Weight Disord.</i> 2017;22(2):211-229. PMID: 27542161                                                 | Population                                       |
| 36. Bohnert A, Zarrett N, Beets MW, et al. Society of Behavioral Medicine (SBM) position statement: SBM supports curbing summertime weight gain among America's youth. <i>Transl Behav Med.</i> 2017;7(4):912-914. PMID: 28660591                                  | No nutrition intervention of interest            |
| 37. Bonvicini L, Pingani I, Venturelli F, et al. Effectiveness of mobile health interventions targeting parents to prevent and treat childhood Obesity: Systematic review. <i>Prev Med Rep.</i> 2022;29:101940.                                                    | Population                                       |
| 38. Boyland E, McGale L, Maden M, Hounscome J, Boland A, Jones A. Systematic review of the effect of policies to restrict the marketing of foods and non-alcoholic beverages to which children are exposed. <i>Obes Rev.</i> 2022;23(8):e13447.                    | Other                                            |
| 39. Bray GA, Heisel WE, Afshin A, et al. The Science of Obesity Management: An Endocrine Society Scientific Statement. <i>Endocr Rev.</i> 2018;39(2):79-132. PMID: 29518206                                                                                        | Population                                       |
| 40. Brink E, van Rossum C, Postma-Smeets A, et al. Development of healthy and sustainable food-based dietary guidelines for the Netherlands. <i>Public Health Nutr.</i> 2019;22(13):2419-2435. PMID: 31262374                                                      | Study Design                                     |
| 41. Brown T, O'Malley C, Blackshaw J, et al. Exploring the evidence base for Tier 3 specialist weight management interventions for children aged 2-18 years in the UK: a rapid systematic review. <i>J Public Health (Oxf).</i> 2018;40(4):835-847. PMID: 29228233 | Population                                       |
| 42. Browne J, Adams K, Atkinson P, Gleeson D, Hayes R. Food and nutrition programs for Aboriginal and Torres Strait Islander Australians: an overview of systematic reviews. <i>Aust Health Rev.</i> 2018;42(6):689-697. PMID: 28923162                            | Population                                       |
| 43. Bucher T, Murawski B, Duncanson K, Labbe D, Van der Horst K. The effect of the labelled serving size on consumption: A systematic review. <i>Appetite.</i> 2018;128:50-57. PMID: 29859775                                                                      | Population                                       |

| Articles                                                                                                                                                                                                                                                                        | Reason for Exclusion                  |
|---------------------------------------------------------------------------------------------------------------------------------------------------------------------------------------------------------------------------------------------------------------------------------|---------------------------------------|
| 44. Buckland NJ, Er V, Redpath I, Beaulieu K. Priming food intake with weight control cues: systematic review with a meta-analysis. <i>Int J Behav Nutr Phys Act</i> . 2018;15(1):66. PMID: 29986712                                                                            | Population                            |
| 45. Burnett AJ, Lamb KE, McCann J, Worsley A, Lacy KE. Parenting styles and the dietary intake of pre-school children: a systematic review. <i>Psychol Health</i> . 2020;35(11):1326-1345. PMID: 32255381                                                                       | No nutrition intervention of interest |
| 46. Burrows T, Goldman S, Pursey K, Lim R. Is there an association between dietary intake and academic achievement: a systematic review. <i>J Hum Nutr Diet</i> . 2017;30(2):117-140. PMID: 27599886                                                                            | No nutrition intervention of interest |
| 47. Buscemi J, Odoms-Young A, Yaroch AL, et al. Society of Behavioral Medicine position statement: retain school meal standards and healthy school lunches. <i>Transl Behav Med</i> . 2019;9(2):389-390. PMID: 29669135                                                         | Study Design                          |
| 48. Cafe ACC, Lopes CAO, Novais RLR, et al. Intake of Sugar-Sweetened Beverages, Milk and Its Association with Body Mass Index in Adolescence: A Systematic Review. <i>Rev Paul Pediatr</i> . 2018;36(1):91-99. PMID: 29513855                                                  | Study Design                          |
| 49. Calvert S, Dempsey RC, Povey R. Delivering in-school interventions to improve dietary behaviours amongst 11- to 16-year-olds: A systematic review. <i>Obes Rev</i> . 2019;20(4):543-553. PMID: 30550629                                                                     | Outcome                               |
| 50. Campbell ET, Franks AT, Joseph PV. Adolescent obesity in the past decade: A systematic review of genetics and determinants of food choice. <i>J Am Assoc Nurse Pract</i> . 2019;31(6):344-351. PMID: 31157651                                                               | No nutrition intervention of interest |
| 51. Cashman KD, Ritz C. Individual participant data (IPD)-level meta-analysis of randomised controlled trials among dark-skinned populations to estimate the dietary requirement for vitamin D. <i>Syst Rev</i> . 2019;8(1):128. PMID: 31138301                                 | Population                            |
| 52. Cavero-Redondo I, Alvarez-Bueno C, Sotos-Prieto M, Gil A, Martinez-Vizcaino V, Ruiz JR. Milk and Dairy Product Consumption and Risk of Mortality: An Overview of Systematic Reviews and Meta-Analyses. <i>Adv Nutr</i> . 2019;10(suppl_2):S97-S104. PMID: 31089743          | Population                            |
| 53. Centeno Tablante E, Pachon H, Guetterman HM, Finkelstein JL. Fortification of wheat and maize flour with folic acid for population health outcomes. <i>Cochrane Database Syst Rev</i> . 2019;7:CD012150. PMID: 31257574                                                     | Population                            |
| 54. Chai LK, Collins C, May C, Brain K, Wong See D, Burrows T. Effectiveness of family-based weight management interventions for children with overweight and obesity: an umbrella review. <i>JBIM Database System Rev Implement Rep</i> . 2019;17(7):1341-1427. PMID: 31021970 | Population                            |



| Articles                                                                                                                                                                                                                                                 | Reason for Exclusion                             |
|----------------------------------------------------------------------------------------------------------------------------------------------------------------------------------------------------------------------------------------------------------|--------------------------------------------------|
| 55. Chai LK, Farletti R, Fathi L, Littlewood R. A Rapid Review of the Impact of Family-Based Digital Interventions for Obesity Prevention and Treatment on Obesity-Related Outcomes in Primary School-Aged Children. <i>Nutrients</i> . 2022;14(22).     | Population                                       |
| 56. Chamberlain JJ, Doyle-Delgado K, Peterson L, Skolnik N. Diabetes Technology: Review of the 2019 American Diabetes Association Standards of Medical Care in Diabetes. <i>Ann Intern Med</i> . 2019;171(6):415-420. PMID: 31404925                     | Study Design                                     |
| 57. Chambers T, Segal A, Sassi F. Interventions using behavioural insights to influence children's diet-related outcomes: A systematic review. <i>Obes Rev</i> . 2021;22(2):e13152. PMID: 33462932                                                       | Outcome                                          |
| 58. Chan AS, Tran TTK, Hsu YH, Liu SYS, Kroon J. A systematic review of dietary acids and habits on dental erosion in adolescents. <i>Int J Paediatr Dent</i> . 2020;30(6):713-733. PMID: 32246790                                                       | Outcome                                          |
| 59. Chan CY, Mohamed N, Ima-Nirwana S, Chin KY. A Review of Knowledge, Belief and Practice Regarding Osteoporosis among Adolescents and Young Adults. <i>Int J Environ Res Public Health</i> . 2018;15(8). PMID: 30103534                                | SR does not have 2 databases or ROB assessment   |
| 60. Chan CL, Tan PY, Gong YY. Evaluating the impacts of school garden-based programmes on diet and nutrition-related knowledge, attitudes and practices among the school children: a systematic review. <i>BMC Public Health</i> . 2022;22(1):1251.      | Outcome                                          |
| 61. Chau MM, Burgermaster M, Mamykina L. The use of social media in nutrition interventions for adolescents and young adults-A systematic review. <i>Int J Med Inform</i> . 2018;120:77-91. PMID: 30409348                                               | Population                                       |
| 62. Chaudhary A, Sudzina F, Mikkelsen BE. Promoting Healthy Eating among Young People-A Review of the Evidence of the Impact of School-Based Interventions. <i>Nutrients</i> . 2020;12(9). PMID: 32971883                                                | No meta-analysis or graded certainty of evidence |
| 63. Chen LH, Wang YF, Xu QH, Chen SS. Omega-3 fatty acids as a treatment for non-alcoholic fatty liver disease in children: A systematic review and meta-analysis of randomized controlled trials. <i>Clin Nutr</i> . 2018;37(2):516-521. PMID: 28040302 | Population                                       |
| 64. Chitturi S, Wong VW, Chan WK, et al. The Asia-Pacific Working Party on Non-alcoholic Fatty Liver Disease guidelines 2017-Part 2: Management and special groups. <i>J Gastroenterol Hepatol</i> . 2018;33(1):86-98. PMID: 28692197                    | Study Design                                     |

| Articles                                                                                                                                                                                                                                                                                | Reason for Exclusion                             |
|-----------------------------------------------------------------------------------------------------------------------------------------------------------------------------------------------------------------------------------------------------------------------------------------|--------------------------------------------------|
| 65. Chu A, Holdaway C, Varma T, Petocz P, Samman S. Lower Serum Zinc Concentration Despite Higher Dietary Zinc Intake in Athletes: A Systematic Review and Meta-analysis. <i>Sports Med.</i> 2018;48(2):327-336. PMID: 39164533                                                         | Population                                       |
| 66. Chung SJ, Ersig AL, McCarthy AM. The Influence of Peers on Diet and Exercise Among Adolescents: A Systematic Review. <i>J Pediatr Nurs.</i> 2017;36:44-56. PMID: 28888511                                                                                                           | No nutrition intervention of interest            |
| 67. Cohen JFW, Hecht AA, McLoughlin GM, Turner L, Schwartz MB. Universal School Meals and Associations with Student Participation, Attendance, Academic Performance, Diet Quality, Food Security, and Body Mass Index: A Systematic Review. <i>Nutrients.</i> 2021;13(3).               | No meta-analysis or graded certainty of evidence |
| 68. Cole NC, An R, Lee SY, Donovan SM. Correlates of picky eating and food neophobia in young children: a systematic review and meta-analysis. <i>Nutr Rev.</i> 2017;75(7):516-532. PMID: 28535257                                                                                      | Population                                       |
| 69. Collado-Soler R, Alf  rez-Pastor M, Torres FL, Trigueros R, Aguilar-Parra JM, Navarro N. A Systematic Review of Healthy Nutrition Intervention Programs in Kindergarten and Primary Education. <i>Nutrients.</i> 2023;15(3).                                                        | SR does not have 2 databases or ROB assessment   |
| 70. Collese TS, Nascimento-Ferreira MV, de Moraes ACF, et al. Role of fruits and vegetables in adolescent cardiovascular health: a systematic review. <i>Nutr Rev.</i> 2017;75(5):339-349. PMID: 28475799                                                                               | No nutrition intervention of interest            |
| 71. Colley P, Myer B, Seabrook J, Gilliland J. The Impact of Canadian School Food Programs on Children's Nutrition and Health: A Systematic Review. <i>Can J Diet Pract Res.</i> 2019;80(2):79-86. PMID: 30430855                                                                       | Outcome                                          |
| 72. Corepal R, Tully MA, Kee F, Miller SJ, Hunter RF. Behavioural incentive interventions for health behaviour change in young people (5-18years old): A systematic review and meta-analysis. <i>Prev Med.</i> 2018;110:55-66. PMID: 29432789                                           | No nutrition intervention of interest            |
| 73. Costa CS, Del-Ponte B, Assuncao MCF, Santos IS. Consumption of ultra-processed foods and body fat during childhood and adolescence: a systematic review. <i>Public Health Nutr.</i> 2018;21(1):148-159. PMID: 28676132                                                              | Study Design                                     |
| 74. Coughlin SS, Smith SA. Community-Based Participatory Research to Promote Healthy Diet and Nutrition and Prevent and Control Obesity Among African-Americans: a Literature Review. <i>J Racial Ethn Health Disparities.</i> 2017;4(2):259-268. PMID: 27059053                        | SR does not have 2 databases or ROB assessment   |
| 75. Craig JV, Bunn DK, Hayhoe RP, Appleyard WO, Lenaghan EA, Welch AA. Relationship between the Mediterranean dietary pattern and musculoskeletal health in children, adolescents, and adults: systematic review and evidence map. <i>Nutr Rev.</i> 2017;75(10):830-857. PMID: 29028268 | Population                                       |

| Articles                                                                                                                                                                                                                                                                                       | Reason for Exclusion                             |
|------------------------------------------------------------------------------------------------------------------------------------------------------------------------------------------------------------------------------------------------------------------------------------------------|--------------------------------------------------|
| 76. Cunha CM, Costa PRF, de Oliveira LPM, Queiroz VAO, Pitangueira JCD, Oliveira AM. Dietary patterns and cardiometabolic risk factors among adolescents: systematic review and meta-analysis. <i>Br J Nutr</i> . 2018;119(8):859-879. PMID: 29644953                                          | No nutrition intervention of interest            |
| 77. da Costa Peres CM, Gardone DS, Costa BVL, Duarte CK, Pessoa MC, Mendes LL. Retail food environment around schools and overweight: a systematic review. <i>Nutr Rev</i> . 2020;78(10):841-856. PMID: 31968100                                                                               | No meta-analysis or graded certainty of evidence |
| 78. Dallacker M, Hertwig R, Mata J. Quality matters: A meta-analysis on components of healthy family meals. <i>Health Psychol</i> . 2019;38(12):1137-1149. PMID: 31556657                                                                                                                      | No nutrition intervention of interest            |
| 79. Darling AL, Manders RJF, Sahni S, et al. Dietary protein and bone health across the life-course: an updated systematic review and meta-analysis over 40 years. <i>Osteoporos Int</i> . 2019;30(4):741-761. PMID: 30903209                                                                  | SR does not have 2 databases or ROB assessment   |
| 80. Darling KE, Sato AF. Systematic Review and Meta-Analysis Examining the Effectiveness of Mobile Health Technologies in Using Self-Monitoring for Pediatric Weight Management. <i>Child Obes</i> . 2017;13(5):347-355. PMID: 28471699                                                        | Population                                       |
| 81. Das JK, Salam RA, Mahmood SB, et al. Food fortification with multiple micronutrients: impact on health outcomes in general population. <i>Cochrane Database Syst Rev</i> . 2019;12:CD011400. PMID: 31849042                                                                                | No nutrition intervention of interest            |
| 82. Dawodu A, Cleaver K. Behavioural correlates of energy drink consumption among adolescents: A review of the literature. <i>J Child Health Care</i> . 2017;21(4):446-462. PMID: 29110525                                                                                                     | No nutrition intervention of interest            |
| 83. de Carvalho GB, Dias-Vasconcelos NL, Santos RKF, Brandao-Lima PN, da Silva DG, Pires LV. Effect of different dietary patterns on glycemic control in individuals with type 2 diabetes mellitus: A systematic review. <i>Crit Rev Food Sci Nutr</i> . 2020;60(12):1999-2010. PMID: 31204492 | Population                                       |
| 84. de Droog SM, van Nee R, Govers M, Buijzen M. Promoting toddlers' vegetable consumption through interactive reading and puppetry. <i>Appetite</i> . 2017;116:75-81. PMID: 28438548                                                                                                          | Study Design                                     |
| 85. de Lamas C, de Castro MJ, Gil-Campos M, Gil A, Couce ML, Leis R. Effects of Dairy Product Consumption on Height and Bone Mineral Content in Children: A Systematic Review of Controlled Trials. <i>Adv Nutr</i> . 2019;10(suppl_2):S88-S96. PMID: 31089738                                 | No nutrition intervention of interest            |
| 86. de Oliveira JF, Romano MCC, Araújo A, Fiedler MW. Effect of Educational Software on Adolescents. <i>J Nurs UFPE</i> 2018;12(11):3078-3088. DOI: 10.5205/1981-8963-v12i11a237657p3078-3088-2018                                                                                             | SR does not have 2 databases or ROB assessment   |
| 87. DeCosta P, Moller P, Frost MB, Olsen A. Changing children's eating behaviour - A review of experimental research. <i>Appetite</i> . 2017;113:327-357. PMID: 28286164                                                                                                                       | SR does not have 2 databases or ROB assessment   |

| Articles                                                                                                                                                                                                                                                                  | Reason for Exclusion                             |
|---------------------------------------------------------------------------------------------------------------------------------------------------------------------------------------------------------------------------------------------------------------------------|--------------------------------------------------|
| 88. Deeb A, Elbarbary N, Smart CE, et al. ISPAD Clinical Practice Consensus Guidelines: Fasting during Ramadan by young people with diabetes. <i>Pediatric Diabetes</i> . 2019;21(1):5-17. DOI: 10.1111/pedi.12920                                                        | Study Design                                     |
| 89. Della Corte KW, Perrar I, Penczynski KJ, Schwingshackl L, Herder C, Buyken AE. Effect of Dietary Sugar Intake on Biomarkers of Subclinical Inflammation: A Systematic Review and Meta-Analysis of Intervention Studies. <i>Nutrients</i> . 2018;10(5). PMID: 29757229 | Population                                       |
| 90. Denova-Gutierrez E, Mendez-Sanchez L, Munoz-Aguirre P, Tucker KL, Clark P. Dietary Patterns, Bone Mineral Density, and Risk of Fractures: A Systematic Review and Meta-Analysis. <i>Nutrients</i> . 2018;10(12). PMID: 30563066                                       | Population                                       |
| 91. De-Regil LM, Jefferds MED, Pena-Rosas JP. Point-of-use fortification of foods with micronutrient powders containing iron in children of preschool and school-age. <i>Cochrane Database Syst Rev</i> . 2017;11:CD009666. PMID: 29168569                                | Other                                            |
| 92. Deren K, Weghuber D, Caroli M, et al. Consumption of Sugar-Sweetened Beverages in Paediatric Age: A Position Paper of the European Academy of Paediatrics and the European Childhood Obesity Group. <i>Ann Nutr Metab</i> . 2019;74(4):296-302. PMID: 31013493        | Study Design                                     |
| 93. Dias JD, Domingues AN, Tibes CM, Zem-Mascarenhas SH, Fonseca LMM. Serious games as an educational strategy to control childhood obesity: a systematic literature review1. <i>Rev Lat Am Enfermagem</i> . 2018;26:e3036. PMID: 30183872                                | SR does not have 2 databases or ROB assessment   |
| 94. Divaris K, Bhaskar V, McGraw KA. Pediatric obesity-related curricular content and training in dental schools and dental hygiene programs: systematic review and recommendations. <i>J Public Health Dent</i> . 2017;77 Suppl 1:S96-S103. PMID: 28708273               | SR does not have 2 databases or ROB assessment   |
| 95. do Amaral EMGR, de Carvalho Silva Vargas F, Dos Santos Chagas CM, Toral N. Nutritional interventions for adolescents using information and communication technologies (ICTs): A systematic review. <i>PLoS One</i> . 2017;12(9):e0184509. PMID: 28961246              | Outcome                                          |
| 96. do Amaral EMGR, Silva PO, Nakabayashi J, Bandeira MV, Toral N, Monteiro R. Family meal frequency and its association with food consumption and nutritional status in adolescents: A systematic review. <i>PLoS One</i> . 2020;15(9):e0239274. PMID: 32946506          | No meta-analysis or graded certainty of evidence |
| 97. Driggers J. 2017 Hypertension Guidelines for Children. <i>SOY CONNECT</i> . 2018;26(3):5-6.                                                                                                                                                                           | Study Design                                     |

| Articles                                                                                                                                                                                                                                                                                                      | Reason for Exclusion                           |
|---------------------------------------------------------------------------------------------------------------------------------------------------------------------------------------------------------------------------------------------------------------------------------------------------------------|------------------------------------------------|
| 98. Durbin J. Pediatric Obesity in Primary Practice: A Review of the Literature. <i>PEDIATR NURS</i> . 2018;44(4):202-206. DOI: 10.1249/ MSS. 00000 0 0000000649                                                                                                                                              | SR does not have 2 databases or ROB assessment |
| 99. Eaton JC, Rothpletz-Puglia P, Dreker MR, et al. Effectiveness of provision of animal-source foods for supporting optimal growth and development in children 6 to 59 months of age. <i>Cochrane Database Syst Rev</i> . 2019;2:CD012818. PMID: 30779870                                                    | Population                                     |
| 100.Edefonti V, Bravi F, Ferraroni M. Breakfast and behavior in morning tasks: Facts or fads? <i>J Affect Disord</i> . 2017;224:16-26. PMID: 28062077                                                                                                                                                         | SR does not have 2 databases or ROB assessment |
| 101.Egbert AH, Creber C, Loren DM, Bohnert AM. Executive function and dietary intake in youth: A systematic review of the literature. <i>Appetite</i> . 2019;139:197-212. PMID: 31014952                                                                                                                      | SR does not have 2 databases or ROB assessment |
| 102.Eichler K, Hess S, Twerenbold C, Sabatier M, Meier F, Wieser S. Health effects of micronutrient fortified dairy products and cereal food for children and adolescents: A systematic review. <i>PLoS One</i> . 2019;14(1):e0210899. PMID: 30673769                                                         | No nutrition intervention of interest          |
| 103.Eid NMS. Child Nutrition Programs in Kindergarten Schools Implemented by the Governmental Sector and Global Nutrition Consulting Companies: A Systematic Review. <i>Current Research in Nutrition &amp; Food Science</i> . 2018;6(3):656-663. DOI: 10.12944/CRNFSJ.6.3.07                                 | SR does not have 2 databases or ROB assessment |
| 104.Ells LJ, Rees K, Brown T, et al. Interventions for treating children and adolescents with overweight and obesity: an overview of Cochrane reviews. <i>Int J Obes (Lond)</i> . 2018;42(11):1823-1833. PMID: 30301964                                                                                       | SR does not have 2 databases or ROB assessment |
| 105.Eva JJ, Kassab YW, Neoh CF, et al. Self-Care and Self-Management Among Adolescent T2DM Patients: A Review. <i>Front Endocrinol (Lausanne)</i> . 2018;9:489. PMID: 30459707                                                                                                                                | SR does not have 2 databases or ROB assessment |
| 106.Evans RA, Frese M, Romero J, Cunningham JH, Mills KE. Chronic fructose substitution for glucose or sucrose in food or beverages has little effect on fasting blood glucose, insulin, or triglycerides: a systematic review and meta-analysis. <i>Am J Clin Nutr</i> . 2017;106(2):519-529. PMID: 28592603 | Population                                     |
| 107.Evans RA, Frese M, Romero J, Cunningham JH, Mills KE. Fructose replacement of glucose or sucrose in food or beverages lowers postprandial glucose and insulin without raising triglycerides: a systematic review and meta-analysis. <i>Am J Clin Nutr</i> . 2017;106(2):506-518. PMID: 28592611           | Population                                     |

| Articles                                                                                                                                                                                                                                                                                            | Reason for Exclusion                           |
|-----------------------------------------------------------------------------------------------------------------------------------------------------------------------------------------------------------------------------------------------------------------------------------------------------|------------------------------------------------|
| 108.Fair KN, Solari Williams KD, Warren J, McKyer ELJ, Ory MG. The Influence of Organizational Culture on School-Based Obesity Prevention Interventions: A Systematic Review of the Literature. <i>J Sch Health</i> . 2018;88(6):462-473. PMID: 29748998                                            | Study Design                                   |
| 109.Fardet A, Richonnet C, Mazur A. Association between consumption of fruit or processed fruit and chronic diseases and their risk factors: a systematic review of meta-analyses. <i>Nutr Rev</i> . 2019;77(6):376-387. PMID: 30995309                                                             | Study Design                                   |
| 110.Fattore E, Botta F, Agostoni C, Bosetti C. Effects of free sugars on blood pressure and lipids: a systematic review and meta-analysis of nutritional isoenergetic intervention trials. <i>Am J Clin Nutr</i> . 2017;105(1):42-56. PMID: 28003201                                                | Population                                     |
| 111.Fidler Mis N, Braegger C, Bronsky J, et al. Sugar in Infants, Children and Adolescents: A Position Paper of the European Society for Paediatric Gastroenterology, Hepatology and Nutrition Committee on Nutrition. <i>J Pediatr Gastroenterol Nutr</i> . 2017;65(6):681-696. PMID: 28922262     | Study Design                                   |
| 112.Flodgren G, Goncalves-Bradley DC, Summerbell CD. Interventions to change the behaviour of health professionals and the organisation of care to promote weight reduction in children and adults with overweight or obesity. <i>Cochrane Database Syst Rev</i> . 2017;11:CD000984. PMID: 29190418 | Population                                     |
| 113.Fornari E, Brusati M, Maffei C. Nutritional Strategies for Childhood Obesity Prevention. <i>Life (Basel)</i> . 2021;11(6).                                                                                                                                                                      | Study Design                                   |
| 114.Flynn JT, Kaelber DC, Baker-Smith CM, et al. Clinical Practice Guideline for Screening and Management of High Blood Pressure in Children and Adolescents. <i>Pediatrics</i> . 2017;140(3). PMID: 28827377                                                                                       | No nutrition intervention of interest          |
| 115.Folkvord F, van 't Riet J. The persuasive effect of advergames promoting unhealthy foods among children: A meta-analysis. <i>Appetite</i> . 2018;129:245-251. PMID: 30031786                                                                                                                    | Outcome                                        |
| 116.Francis L, Shodeinde L, Black MM, Allen J. Examining the Obesogenic Attributes of the Family Child Care Home Environment: A Literature Review. <i>J Obes</i> . 2018;2018:3490651. PMID: 29983998                                                                                                | SR does not have 2 databases or ROB assessment |
| 117.Franse CB, Boelens M, Fries LR, Constant F, van Grieken A, Raat H. Interventions to increase the consumption of water among children: A systematic review and meta-analysis. <i>Obes Rev</i> . 2020;21(7):e13015. PMID: 32167233                                                                | Outcome                                        |
| 118.Gaidhane AM, Sinha A, Khatib MN, et al. A Systematic Review on Effect of Electronic Media on Diet, Exercise, and Sexual Activity among Adolescents. <i>Indian J Community Med</i> . 2018;43(Suppl 1):S56-s65.                                                                                   | Population                                     |

| Articles                                                                                                                                                                                                                                                                                       | Reason for Exclusion                           |
|------------------------------------------------------------------------------------------------------------------------------------------------------------------------------------------------------------------------------------------------------------------------------------------------|------------------------------------------------|
| 119. Gao X, Zhang H, Guo XF, Li K, Li S, Li D. Effect of Betaine on Reducing Body Fat-A Systematic Review and Meta-Analysis of Randomized Controlled Trials. <i>Nutrients</i> . 2019;11(10). PMID: 31623137                                                                                    | Population                                     |
| 120. Garbers S, Hunersen K, Nechitilo M, et al. Healthy Weight and Cardiovascular Health Promotion Interventions for Adolescent and Young Adult Males of Color: A Systematic Review. <i>Am J Mens Health</i> . 2018;12(5):1328-1351. PMID: 29808765                                            | SR does not have 2 databases or ROB assessment |
| 121. Garcia RI, Kleinman D, Holt K, et al. Healthy Futures: Engaging the oral health community in childhood obesity prevention - Conference summary and recommendations. <i>J Public Health Dent</i> . 2017;77 Suppl 1:S136-S140. PMID: 28621818                                               | Study Design                                   |
| 122. Garrido-Miguel M, Oliveira A, Caverro-Redondo I, et al. Prevalence of Overweight and Obesity among European Preschool Children: A Systematic Review and Meta-Regression by Food Group Consumption. <i>Nutrients</i> . 2019;11(7). PMID: 31340602                                          | Study Design                                   |
| 123. Ghobadi S, Hassanzadeh-Rostami Z, Salehi-Marzijarani M, et al. Association of eating while television viewing and overweight/obesity among children and adolescents: a systematic review and meta-analysis of observational studies. <i>Obes Rev</i> . 2018;19(3):313-320. PMID: 29266643 | No nutrition intervention of interest          |
| 124. Gibson PS, Lang S, Dhawan A, et al. Systematic Review: Nutrition and Physical Activity in the Management of Paediatric Nonalcoholic Fatty Liver Disease. <i>J Pediatr Gastroenterol Nutr</i> . 2017;65(2):141-149. PMID: 28737568                                                         | Population                                     |
| 125. Godin KM, Kirkpatrick SI, Hanning RM, Stapleton J, Leatherdale ST. Examining Guidelines for School-Based Breakfast Programs in Canada: A Systematic Review of the Grey Literature. <i>Can J Diet Pract Res</i> . 2017;78(2):92-100. PMID: 28145767                                        | SR does not have 2 databases or ROB assessment |
| 126. Goldthorpe J, Epton T, Keyworth C, Calam R, Armitage CJ. Are primary/elementary school-based interventions effective in preventing/ameliorating excess weight gain? A systematic review of systematic reviews. <i>Obes Rev</i> . 2020;21(6):e13001. PMID: 32162477                        | Study Design                                   |
| 127. Gonzalez KE, Freysteinson W. Youth-Onset Type 2 Diabetes Mellitus In Primary Practice: A Review. <i>Pediatric Nursing</i> . 2019;45(6):293-297.                                                                                                                                           | SR does not have 2 databases or ROB assessment |
| 128. Goodyear VA, Wood G, Skinner B, Thompson JL. The effect of social media interventions on physical activity and dietary behaviours in young people and adults: a systematic review. <i>Int J Behav Nutr Phys Act</i> . 2021;18(1):72.                                                      | Population                                     |

| Articles                                                                                                                                                                                                                                                                                                  | Reason for Exclusion                           |
|-----------------------------------------------------------------------------------------------------------------------------------------------------------------------------------------------------------------------------------------------------------------------------------------------------------|------------------------------------------------|
| 129.Goran MI, Riemer SL, Alderete TL. Simplified and age-appropriate recommendations for added sugars in children. <i>Pediatr Obes.</i> 2018;13(4):269-272. PMID: 28921869                                                                                                                                | Study Design                                   |
| 130.Gordon K, Dynan L, Siegel R. Healthier Choices in School Cafeterias: A Systematic Review of Cafeteria Interventions. <i>J Pediatr.</i> 2018;203:273-279 e272. PMID: 30213461                                                                                                                          | SR does not have 2 databases or ROB assessment |
| 131.Gori D, Guaraldi F, Cinocca S, Moser G, Rucci P, Fantini MP. Effectiveness of educational and lifestyle interventions to prevent paediatric obesity: systematic review and meta-analyses of randomized and non-randomized controlled trials. <i>Obes Sci Pract.</i> 2017;3(3):235-248. PMID: 29071100 | Population                                     |
| 132.Gow ML, Tee MSY, Garnett SP, et al. Pediatric obesity treatment, self-esteem, and body image: A systematic review with meta-analysis. <i>Pediatr Obes.</i> 2020;15(3):e12600. PMID: 32020780                                                                                                          | Population                                     |
| 133.Graziose MM, Downs SM, O'Brien Q, Fanzo J. Systematic review of the design, implementation and effectiveness of mass media and nutrition education interventions for infant and young child feeding. <i>Public Health Nutr.</i> 2018;21(2):273-287. PMID: 29081315                                    | Population                                     |
| 134.Grimes CA, Bolton KA, Booth AB, et al. The association between dietary sodium intake, adiposity and sugar-sweetened beverages in children and adults: a systematic review and meta-analysis. <i>Br J Nutr.</i> 2021;126(3):409-427. PMID: 33054868                                                    | Study Design                                   |
| 135.Grossman Z, Hadjipanayis A, Stiris T, et al. Vitamin D in European children-statement from the European Academy of Paediatrics (EAP). <i>Eur J Pediatr.</i> 2017;176(6):829-831. PMID: 28401345                                                                                                       | Other                                          |
| 136.Guzek D, Glabska D, Groele B, Gutkowska K. Role of fruit and vegetables for the mental health of children: a systematic review. <i>Rocz Panstw Zakl Hig.</i> 2020;71(1):5-13. PMID: 32227779                                                                                                          | SR does not have 2 databases or ROB assessment |
| 137.Haines J, Haycraft E, Lytle L, et al. Nurturing Children's Healthy Eating: Position statement. <i>Appetite.</i> 2019;137:124-133. PMID: 30797837                                                                                                                                                      | Study Design                                   |
| 138.Hamid MA, Sazlina SG. Interventions for obesity among schoolchildren: A systematic review and meta-analyses. <i>PLoS One.</i> 2019;14(1):e0209746. PMID: 30625165                                                                                                                                     | Population                                     |



| Articles                                                                                                                                                                                                                                                                                         | Reason for Exclusion                  |
|--------------------------------------------------------------------------------------------------------------------------------------------------------------------------------------------------------------------------------------------------------------------------------------------------|---------------------------------------|
| 139.Hammersley M, Jones R, Okely A. Parent-focused childhood overweight and obesity eHealth interventions: A systematic review and meta-analysis. <i>Obesity research &amp; clinical practice</i> . 2019;13(1):84.                                                                               | No nutrition intervention of interest |
| 140.Harrison SE, Greenhouse D. Dietary and Nutrition Recommendations in Pediatric Primary Care: A Call to Action. <i>South Med J</i> . 2018;111(1):12-17. PMID: 29298363                                                                                                                         | Study Design                          |
| 141.Hasan B, Thompson WG, Almasri J, et al. The effect of culinary interventions (cooking classes) on dietary intake and behavioral change: a systematic review and evidence map. <i>BMC Nutr</i> . 2019;5:29. PMID: 32153942                                                                    | Population                            |
| 142.Hauger H, Laursen RP, Ritz C, Molgaard C, Lind MV, Damsgaard CT. Effects of vitamin D supplementation on cardiometabolic outcomes in children and adolescents: a systematic review and meta-analysis of randomized controlled trials. <i>Eur J Nutr</i> . 2020;59(3):873-884. PMID: 32060613 | Outcome                               |
| 143.Hayba N, Rissel C, Allman Farinelli M. Effectiveness of lifestyle interventions in preventing harmful weight gain among adolescents: A systematic review of systematic reviews. <i>Obes Rev</i> . 2021;22(2):e13109.                                                                         | Study Design                          |
| 144.Hayes D, Contento IR, Weekly C. Position of the Academy of Nutrition and Dietetics, Society for Nutrition Education and Behavior, and School Nutrition Association: Comprehensive Nutrition Programs and Services in Schools. <i>J Acad Nutr Diet</i> . 2018;118(5):913-919. PMID: 29703342  | Study Design                          |
| 145.He S, Stein AD. Early-Life Nutrition Interventions and Associated Long-Term Cardiometabolic Outcomes: A Systematic Review and Meta-Analysis of Randomized Controlled Trials. <i>Adv Nutr</i> . 2021;12(2):461-489.                                                                           | No nutrition intervention of interest |
| 146.Heerman WJ, JaKa MM, Berge JM, et al. The dose of behavioral interventions to prevent and treat childhood obesity: a systematic review and meta-regression. <i>Int J Behav Nutr Phys Act</i> . 2017;14(1):157. PMID: 29141651                                                                | No nutrition intervention of interest |
| 147.Hendrie GA, Lease HJ, Bowen J, Baird DL, Cox DN. Strategies to increase children's vegetable intake in home and community settings: a systematic review of literature. <i>Matern Child Nutr</i> . 2017;13(1). PMID: 26924706                                                                 | Outcome                               |
| 148.Henry BW, Ziegler J, Parrott JS, Handu D. Pediatric Weight Management Evidence-Based Practice Guidelines: Components and Contexts of Interventions. <i>J Acad Nutr Diet</i> . 2018;118(7):1301-1311 e1323. PMID: 29233517                                                                    | Population                            |

| Articles                                                                                                                                                                                                                                                                                                                           | Reason for Exclusion                           |
|------------------------------------------------------------------------------------------------------------------------------------------------------------------------------------------------------------------------------------------------------------------------------------------------------------------------------------|------------------------------------------------|
| 149.Hens W, Vissers D, Hansen D, et al. The effect of diet or exercise on ectopic adiposity in children and adolescents with obesity: a systematic review and meta-analysis. <i>Obes Rev.</i> 2017;18(11):1310-1322. PMID: 28913977                                                                                                | Population                                     |
| 150.Heshmati J, Sepidarkish M, Namazi N, et al. Impact of Dietary Calcium Supplement on Circulating Lipoprotein Concentrations and Atherogenic Indices in Overweight and Obese Individuals: A Systematic Review. <i>J Diet Suppl.</i> 2019;16(3):357-367. PMID:29561197                                                            | Population                                     |
| 151.Heyman MB, Abrams SA, Section On Gastroenterology H, Nutrition, Committee On N. Fruit Juice in Infants, Children, and Adolescents: Current Recommendations. <i>Pediatrics.</i> 2017;139(6). PMID: 28562300                                                                                                                     | Study Design                                   |
| 152.Hilger-Kolb J, Bosle C, Motoc I, Hoffmann K. Associations between dietary factors and obesity-related biomarkers in healthy children and adolescents - a systematic review. <i>Nutr J.</i> 2017;16(1):85. PMID: 29282082                                                                                                       | Study Design                                   |
| 153.Hillier-Brown FC, Summerbell CD, Moore HJ, et al. The impact of interventions to promote healthier ready-to-eat meals (to eat in, to take away or to be delivered) sold by specific food outlets open to the general public: a systematic review. <i>Obes Rev.</i> 2017;18(2):227-246. PMID: 27899007                          | Population                                     |
| 154.Ho RS, Chan EK, Liu KK, Wong SH. Active video game on children and adolescents' physical activity and weight management: A network meta-analysis. <i>Scand J Med Sci Sports.</i> 2022;32(8):1268-1286.                                                                                                                         | No nutrition intervention of interest          |
| 155.Ho HVT, Jovanovski E, Zurbau A, et al. A systematic review and meta-analysis of randomized controlled trials of the effect of konjac glucomannan, a viscous soluble fiber, on LDL cholesterol and the new lipid targets non-HDL cholesterol and apolipoprotein B. <i>Am J Clin Nutr.</i> 2017;105(5):1239-1247. PMID: 28356275 | Outcome                                        |
| 156.Hoare E, Varsamis P, Owen N, Dunstan DW, Jennings GL, Kingwell BA. Sugar- and Intense-Sweetened Drinks in Australia: A Systematic Review on Cardiometabolic Risk. <i>Nutrients.</i> 2017;9(10). PMID: 28956823                                                                                                                 | SR does not have 2 databases or ROB assessment |
| 157.Hodder RK, O'Brien KM, Stacey FG, et al. Interventions for increasing fruit and vegetable consumption in children aged five years and under. <i>Cochrane Database Syst Rev.</i> 2019;2019(11). PMID: 31697869                                                                                                                  | Population                                     |
| 158.Hojsak I, Bronsky J, Campoy C, et al. Young Child Formula: A Position Paper by the ESPGHAN Committee on Nutrition. <i>J Pediatr Gastroenterol Nutr.</i> 2018;66(1):177-185. PMID: 29095351                                                                                                                                     | Population                                     |

| Articles                                                                                                                                                                                                                                                                 | Reason for Exclusion                           |
|--------------------------------------------------------------------------------------------------------------------------------------------------------------------------------------------------------------------------------------------------------------------------|------------------------------------------------|
| 159.Holley CE, Mason C. A Systematic Review of the Evaluation of Interventions to Tackle Children's Food Insecurity. <i>Curr Nutr Rep.</i> 2019;8(1):11-27. PMID: 30762204                                                                                               | Outcome                                        |
| 160.Holmes WS, Moorhead SA, Coates VE, Bond RR, Zheng H. Impact of digital technologies for communicating messages on weight loss maintenance: a systematic literature review. <i>Eur J Public Health.</i> 2019;29(2):320-328. PMID: 30239699                            | SR does not have 2 databases or ROB assessment |
| 161.Hombali AS, Solon JA, Venkatesh BT, Nair NS, Pena-Rosas JP. Fortification of staple foods with vitamin A for vitamin A deficiency. <i>Cochrane Database Syst Rev.</i> 2019;5:CD010068. PMID: 31074495                                                                | Other                                          |
| 162.Hsiao BS, Sibeko L, Troy LM. A Systematic Review of Mobile Produce Markets: Facilitators and Barriers to Use, and Associations with Reported Fruit and Vegetable Intake. <i>J Acad Nutr Diet.</i> 2019;119(1):76-97 e71. PMID: 29764767                              | Population                                     |
| 163.Hsu MSH, Rouf A, Allman-Farinelli M. Effectiveness and Behavioral Mechanisms of Social Media Interventions for Positive Nutrition Behaviors in Adolescents: A Systematic Review. <i>J Adolesc Health.</i> 2018;63(5):531-545. PMID: 30197198                         | Outcome                                        |
| 164.Iaccarino Idelson P, Scalfi L, Valerio G. Adherence to the Mediterranean Diet in children and adolescents: A systematic review. <i>Nutr Metab Cardiovasc Dis.</i> 2017;27(4):283-299. PMID: 28254269                                                                 | Study Design                                   |
| 165.Innella N, Jameson BE. Interventions that impact weight status in Hispanic preschool children. <i>Public Health Nurs.</i> 2020;37(1):25-38. PMID: 31633235                                                                                                           | SR does not have 2 databases or ROB assessment |
| 166.Itkonen ST, Erkkola M, Lamberg-Allardt CJE. Vitamin D Fortification of Fluid Milk Products and Their Contribution to Vitamin D Intake and Vitamin D Status in Observational Studies-A Review. <i>Nutrients.</i> 2018;10(8). PMID: 30096919                           | SR does not have 2 databases or ROB assessment |
| 167.Jacob CM, Hardy-Johnson PL, Inskip HM, et al. A systematic review and meta-analysis of school-based interventions with health education to reduce body mass index in adolescents aged 10 to 19 years. <i>Int J Behav Nutr Phys Act.</i> 2021;18(1):1. PMID: 33397403 | No nutrition intervention of interest          |
| 168.Jacob CM, Newell ML, Hanson M. Narrative review of reviews of preconception interventions to prevent an increased risk of obesity and non-communicable diseases in children. <i>Obes Rev.</i> 2019;20 Suppl 1:5-17. PMID: 31419048                                   | Population                                     |

| Articles                                                                                                                                                                                                                                                                                              | Reason for Exclusion                           |
|-------------------------------------------------------------------------------------------------------------------------------------------------------------------------------------------------------------------------------------------------------------------------------------------------------|------------------------------------------------|
| 169. Jebeile H, Gow ML, Baur LA, Garnett SP, Paxton SJ, Lister NB. Association of Pediatric Obesity Treatment, Including a Dietary Component, With Change in Depression and Anxiety: A Systematic Review and Meta-analysis. <i>JAMA Pediatr.</i> 2019;173(11):e192841. PMID: 31524933                 | Population                                     |
| 170. Jebeile H, Gow ML, Baur LA, Garnett SP, Paxton SJ, Lister NB. Treatment of obesity, with a dietary component, and eating disorder risk in children and adolescents: A systematic review with meta-analysis. <i>Obes Rev.</i> 2019;20(9):1287-1298. PMID: 31131531                                | Population                                     |
| 171. Ji X, Grandner MA, Liu J. The relationship between micronutrient status and sleep patterns: a systematic review. <i>Public Health Nutr.</i> 2017;20(4):687-701. PMID: 27702409                                                                                                                   | Population                                     |
| 172. Jia P, Luo M, Li Y, Zheng JS, Xiao Q, Luo J. Fast-food restaurant, unhealthy eating, and childhood obesity: A systematic review and meta-analysis. <i>Obes Rev.</i> 2021;22 Suppl 1:e12944. PMID: 31507064                                                                                       | Study Design                                   |
| 173. Johnson BJ, Zarnowiecki D, Hendrie GA, Mauch CE, Golley RK. How to reduce parental provision of unhealthy foods to 3- to 8-year-old children in the home environment? A systematic review utilizing the Behaviour Change Wheel framework. <i>Obes Rev.</i> 2018;19(10):1359-1370. PMID: 30092606 | Outcome                                        |
| 174. Johnson RK, Lichtenstein AH, Anderson CAM, et al. Low-Calorie Sweetened Beverages and Cardiometabolic Health: A Science Advisory From the American Heart Association. <i>Circulation.</i> 2018;138(9):e126-e140. PMID: 30354445                                                                  | Study Design                                   |
| 175. Juhl CR, Bergholdt HKM, Miller IM, Jemec GBE, Kanters JK, Ellervik C. Dairy Intake and Acne Vulgaris: A Systematic Review and Meta-Analysis of 78,529 Children, Adolescents, and Young Adults. <i>Nutrients.</i> 2018;10(8). PMID: 30096883                                                      | SR does not have 2 databases or ROB assessment |
| 176. Kaakinen P, Kyngas H, Kaariainen M. Technology-based counseling in the management of weight and lifestyles of obese or overweight children and adolescents: A descriptive systematic literature review. <i>Inform Health Soc Care.</i> 2018;43(2):126-141. PMID: 28829655                        | Population                                     |
| 177. Kagie R, Lin SN, Hussain MA, Thompson SC. A Pragmatic Review to Assist Planning and Practice in Delivering Nutrition Education to Indigenous Youth. <i>Nutrients.</i> 2019;11(3). PMID: 30818853                                                                                                 | SR does not have 2 databases or ROB assessment |
| 178. Kang K, Sotunde OF, Weiler HA. Effects of Milk and Milk-Product Consumption on Growth among Children and Adolescents Aged 6-18 Years: A Meta-Analysis of Randomized Controlled Trials. <i>Adv Nutr.</i> 2019;10(2):250-261. PMID: 30839054                                                       | Outcome                                        |

| Articles                                                                                                                                                                                                                                                                            | Reason for Exclusion                           |
|-------------------------------------------------------------------------------------------------------------------------------------------------------------------------------------------------------------------------------------------------------------------------------------|------------------------------------------------|
| 179.Kastorini CM, Critselis E, Zota D, et al. National Dietary Guidelines of Greece for children and adolescents: a tool for promoting healthy eating habits. <i>Public Health Nutr.</i> 2019;22(14):2688-2699. PMID: 31111809                                                      | Study Design                                   |
| 180.Kemper AR, Fan T, Grossman DC, Phipps MG. Gaps in evidence regarding iron deficiency anemia in pregnant women and young children: summary of US Preventive Services Task Force recommendations. <i>Am J Clin Nutr.</i> 2017;106(Suppl 6):1555S-1558S. PMID: 29070541            | Population                                     |
| 181.Kent K, Charlton KE, Netzel M, Fanning K. Food-based anthocyanin intake and cognitive outcomes in human intervention trials: a systematic review. <i>J Hum Nutr Diet.</i> 2017;30(3):260-274. PMID: 27730693                                                                    | SR does not have 2 databases or ROB assessment |
| 182.Khan K, Jovanovski E, Ho HVT, et al. The effect of viscous soluble fiber on blood pressure: A systematic review and meta-analysis of randomized controlled trials. <i>Nutr Metab Cardiovasc Dis.</i> 2018;28(1):3-13. PMID: 29153856                                            | Population                                     |
| 183.Khanna P, Chattu VK, Aeri BT. Nutritional Aspects of Depression in Adolescents - A Systematic Review. <i>Int J Prev Med.</i> 2019;10:42. PMID: 31057727                                                                                                                         | SR does not have 2 databases or ROB assessment |
| 184.King S, Tancredi D, Lenoir-Wijnkoop I, et al. Does probiotic consumption reduce antibiotic utilization for common acute infections? A systematic review and meta-analysis. <i>Eur J Public Health.</i> 2019;29(3):494-499. PMID: 30219897                                       | Population                                     |
| 185.Kirkland L, Apatu E, Mease A, Largo-Wight E. School-based nutrition and garden programs and parental dietary changes in low-income settings: a review. <i>International Journal of Health Promotion and Education.</i> 2018;56(4-5):226-236. DOI: 10.1080/14635240.2018.1512881 | SR does not have 2 databases or ROB assessment |
| 186.Kao TA, Ling J, Hawn R, Vu C. The effects of motivational interviewing on children's body mass index and fat distributions: A systematic review and meta-analysis. <i>Obes Rev.</i> 2021;22(10):e13308.                                                                         | No nutrition intervention of interest          |
| 187.Kemp BJ, Thompson DR, Watson CJ, McGuigan K, Woodside JV, Ski CF. Effectiveness of family-based eHealth interventions in cardiovascular disease risk reduction: A systematic review. <i>Prev Med.</i> 2021;149:106608.                                                          | No nutrition intervention of interest          |
| 188.Kininmonth AR, Smith AD, Llewellyn CH, Dye L, Lawton CL, Fildes A. The relationship between the home environment and child adiposity: a systematic review. <i>International Journal of Behavioral Nutrition &amp; Physical Activity.</i> 2021;18(1):1-20.                       | No nutrition intervention of interest          |

| Articles                                                                                                                                                                                                                                                                                             | Reason for Exclusion                           |
|------------------------------------------------------------------------------------------------------------------------------------------------------------------------------------------------------------------------------------------------------------------------------------------------------|------------------------------------------------|
| 189.Koletzko B, Godfrey KM, Poston L, et al. Nutrition During Pregnancy, Lactation and Early Childhood and its Implications for Maternal and Long-Term Child Health: The Early Nutrition Project Recommendations. <i>Ann Nutr Metab.</i> 2019;74(2):93-106. PMID: 30673669                           | Population                                     |
| 190.Kosmeri C, Siomou E, Vlahos AP, Milionis H. Review shows that lipid disorders are associated with endothelial but not renal dysfunction in children. <i>Acta Paediatr.</i> 2019;108(1):19-27. PMID: 30066344                                                                                     | SR does not have 2 databases or ROB assessment |
| 191.Kraak VI, Rincon-Gallardo Patino S, Sacks G. An accountability evaluation for the International Food & Beverage Alliance's Global Policy on Marketing Communications to Children to reduce obesity: A narrative review to inform policy. <i>Obes Rev.</i> 2019;20 Suppl 2:90-106. PMID: 31034139 | SR does not have 2 databases or ROB assessment |
| 192.Kracht CL, Burkart S, Flanagan EW, Melnick E, Luecking C, Neshteruk C. Policy, system, and environmental interventions addressing obesity and diet-related outcomes in early childhood education settings: A systematic review. <i>Obes Rev.</i> 2023;24(4):e13547.                              | No nutrition intervention of interest          |
| 193.Kranz S, Pimpin L, Fawzi W, Duggan C, Webb P, Mozaffarian D. Mortality Benefits of Vitamin A Are Not Affected by Varying Frequency, Total Dose, or Duration of Supplementation. <i>Food Nutr Bull.</i> 2017;38(2):260-266. PMID: 28513263                                                        | SR does not have 2 databases or ROB assessment |
| 194.Labonte ME, Poon T, Gladanac B, et al. Nutrient Profile Models with Applications in Government-Led Nutrition Policies Aimed at Health Promotion and Noncommunicable Disease Prevention: A Systematic Review. <i>Adv Nutr.</i> 2018;9(6):741-788. PMID: 30462178                                  | SR does not have 2 databases or ROB assessment |
| 195.Lamas S, Rebelo S, da Costa S, Sousa H, Zagalo N, Pinto E. The Influence of Serious Games in the Promotion of Healthy Diet and Physical Activity Health: A Systematic Review. <i>Nutrients.</i> 2023;15(6).                                                                                      | Outcome                                        |
| 196.Lassale C, Batty GD, Baghdadli A, et al. Healthy dietary indices and risk of depressive outcomes: a systematic review and meta-analysis of observational studies. <i>Mol Psychiatry.</i> 2019;24(7):965-986. PMID: 30254236                                                                      | Population                                     |
| 197.Lassale C, Fitó M, Morales-Suárez-Varela M, Moya A, Gómez SF, Schröder H. Mediterranean diet and adiposity in children and adolescents: A systematic review. <i>Obes Rev.</i> 2022;23 Suppl 1:e13381.                                                                                            | SR does not have 2 databases or ROB assessment |
| 198.Lassi ZS, Salam RA, Bhutta ZA. Recommendations on Arresting Global Health Challenges Facing Adolescents and Young Adults. <i>Ann Glob Health.</i> 2017;83(5-6):704-712. PMID: 29248085                                                                                                           | Study Design                                   |

| Articles                                                                                                                                                                                                                                                                                             | Reason for Exclusion                             |
|------------------------------------------------------------------------------------------------------------------------------------------------------------------------------------------------------------------------------------------------------------------------------------------------------|--------------------------------------------------|
| 199.Lecube A, Monereo S, Rubio MA, et al. Prevention, diagnosis, and treatment of obesity. 2016 position statement of the Spanish Society for the Study of Obesity. <i>Endocrinol Diabetes Nutr.</i> 2017;64 Suppl 1:15-22. PMID: 27543006                                                           | Population                                       |
| 200.Lemale J, Mas E, Jung C, et al. Vegan diet in children and adolescents. Recommendations from the French-speaking Pediatric Hepatology, Gastroenterology and Nutrition Group (GFHGNP). <i>Arch Pediatr.</i> 2019;26(7):442-450. PMID: 31615715                                                    | Study Design                                     |
| 201.Leme ACB, Haines J, Tang L, et al. Impact of Strategies for Preventing Obesity and Risk Factors for Eating Disorders among Adolescents: A Systematic Review. <i>Nutrients.</i> 2020;12(10). PMID: 33066501                                                                                       | No meta-analysis or graded certainty of evidence |
| 202.Lewis KA, Brown SA. Searching for Evidence of an Anti-Inflammatory Diet in Children: A Systematic Review of Randomized Controlled Trials for Pediatric Obesity Interventions With a Focus on Leptin, Ghrelin, and Adiponectin. <i>Biol Res Nurs.</i> 2017;19(5):511-530. PMID: 28743192          | Population                                       |
| 203.Li B, Lv J, Wang W, Zhang D. Dietary magnesium and calcium intake and risk of depression in the general population: A meta-analysis. <i>Aust N Z J Psychiatry.</i> 2017;51(3):219-229. PMID: 27807012                                                                                            | SR does not have 2 databases or ROB assessment   |
| 204.Liberali R, Kupek E, Assis MAA. Dietary Patterns and Childhood Obesity Risk: A Systematic Review. <i>Child Obes.</i> 2020;16(2):70-85. PMID: 31742427                                                                                                                                            | Study Design                                     |
| 205.Lim YM, Song S, Song WO. Prevalence and Determinants of Overweight and Obesity in Children and Adolescents from Migrant and Seasonal Farmworker Families in the United States-A Systematic Review and Qualitative Assessment. <i>Nutrients.</i> 2017;9(3). PMID: 28245565                        | Study Design                                     |
| 206.Lima do Vale MR, Farmer A, Ball GDC, Gokiart R, Maximova K, Thorlakson J. Implementation of Healthy Eating Interventions in Center-Based Childcare: The Selection, Application, and Reporting of Theories, Models, and Frameworks. <i>Am J Health Promot.</i> 2020;34(4):402-417. PMID: 31983219 | SR does not have 2 databases or ROB assessment   |
| 207.Limone P, Messina G, Toto GA. Serious games and eating behaviors: A systematic review of the last 5 years (2018-2022). <i>Front Nutr.</i> 2022;9:978793.                                                                                                                                         | Outcome                                          |
| 208.Lindsay AC, Mesa T, Greaney ML, Wallington SF, Wright JA. Associations Between Maternal Depressive Symptoms and Nonresponsive Feeding Styles and Practices in Mothers of Young Children: A Systematic Review. <i>JMIR Public Health Surveill.</i> 2017;3(2):e29. PMID: 28550007                  | No nutrition intervention of interest            |

| Articles                                                                                                                                                                                                                                                                                                                     | Reason for Exclusion                             |
|------------------------------------------------------------------------------------------------------------------------------------------------------------------------------------------------------------------------------------------------------------------------------------------------------------------------------|--------------------------------------------------|
| 209.Litchford A, Savoie Roskos MR, Wengreen H. Influence of fathers on the feeding practices and behaviors of children: A systematic review. <i>Appetite</i> . 2020;147:104558. PMID: 31870933                                                                                                                               | No meta-analysis or graded certainty of evidence |
| 210.Liu E, Pimpin L, Shulkin M, et al. Effect of Zinc Supplementation on Growth Outcomes in Children under 5 Years of Age. <i>Nutrients</i> . 2018;10(3). PMID: 29558383                                                                                                                                                     | No nutrition intervention of interest            |
| 211.Liu YS, Wu QJ, Xia Y, et al. Carbohydrate intake and risk of metabolic syndrome: A dose-response meta-analysis of observational studies. <i>Nutr Metab Cardiovasc Dis</i> . 2019;29(12):1288-1298. PMID: 31653521                                                                                                        | Population                                       |
| 212.Locke A, Stoesser K, Pippitt K. Health Maintenance in School-Aged Children: Part II. Counseling Recommendations. <i>Am Fam Physician</i> . 2019;100(4):219-226. PMID: 31414773                                                                                                                                           | Study Design                                     |
| 213.Lopez PD, Cativo EH, Atlas SA, Rosendorff C. The Effect of Vegan Diets on Blood Pressure in Adults: A Meta-Analysis of Randomized Controlled Trials. <i>Am J Med</i> . 2019;132(7):875-883.e877.                                                                                                                         | Population                                       |
| 214.Lott M, Callahan E, Welker Duffy E, Story M, Daniels S. <i>Healthy Beverage Consumption in Early Childhood: Recommendations from Key National Health and Nutrition Organizations. Technical Scientific Report</i> . Durham, NC: Healthy Eating Research;2019.                                                            | Study Design                                     |
| 215.Luecking CT, Hennink-Kaminski H, Ihekweazu C, Vaughn A, Mazzucca S, Ward DS. Social marketing approaches to nutrition and physical activity interventions in early care and education centres: a systematic review. <i>Obes Rev</i> . 2017;18(12):1425-1438. PMID: 28960764                                              | SR does not have 2 databases or ROB assessment   |
| 216.MacArthur G, Caldwell DM, Redmore J, et al. Individual-, family-, and school-level interventions targeting multiple risk behaviours in young people. <i>Cochrane Database Syst Rev</i> . 2018;10:CD009927. PMID: 30288738                                                                                                | No nutrition intervention of interest            |
| 217.Macedo RCO, Vieira AF, Moritz CEJ, Reischak-Oliveira A. Effects of fructose consumption on postprandial TAG: an update on systematic reviews with meta-analysis. <i>Br J Nutr</i> . 2018;120(4):364-372. PMID:29962368                                                                                                   | Population                                       |
| 218.Mack I, Bayer C, Schaffeler N, et al. Chances and Limitations of Video Games in the Fight against Childhood Obesity-A Systematic Review. <i>Eur Eat Disord Rev</i> . 2017;25(4):237-267. PMID: 28467004                                                                                                                  | No meta-analysis or graded certainty of evidence |
| 219.Maine A, Brown MJ, Ski CF, Thompson DR, Marsh L, O'Leary L. Recruitment settings, delivery contexts, intervention techniques and outcomes of health promotion programmes for young adults with intellectual and developmental disabilities: A systematic review. <i>Res Dev Disabil</i> . 2020;99:103592. PMID: 32035320 | No meta-analysis or graded certainty of evidence |



| Articles                                                                                                                                                                                                                                                                                                    | Reason for Exclusion                             |
|-------------------------------------------------------------------------------------------------------------------------------------------------------------------------------------------------------------------------------------------------------------------------------------------------------------|--------------------------------------------------|
| 220. Manley J, Alderman H, Gentilini U. More evidence on cash transfers and child nutritional outcomes: a systematic review and meta-analysis. <i>BMJ Glob Health</i> . 2022;7(4).                                                                                                                          | SR does not have 2 databases or ROB assessment   |
| 221. Mann JP, Tang GY, Nobili V, Armstrong MJ. Evaluations of Lifestyle, Dietary, and Pharmacologic Treatments for Pediatric Nonalcoholic Fatty Liver Disease: A Systematic Review. <i>Clin Gastroenterol Hepatol</i> . 2019;17(8):1457-1476 e1457. PMID: 29857146                                          | Population                                       |
| 222. Mansfield JL, Savaiano DA. Effect of school wellness policies and the Healthy, Hunger-Free Kids Act on food-consumption behaviors of students, 2006-2016: a systematic review. <i>Nutr Rev</i> . 2017;75(7):533-552. PMID: 28838082                                                                    | Outcome                                          |
| 223. Marcano-Olivier MI, Horne PJ, Viktor S, Erjavec M. Using Nudges to Promote Healthy Food Choices in the School Dining Room: A Systematic Review of Previous Investigations. <i>J Sch Health</i> . 2020;90(2):143-157. PMID: 31852016                                                                    | Outcome                                          |
| 224. Martin A, Booth JN, Laird Y, Sproule J, Reilly JJ, Saunders DH. Physical activity, diet and other behavioural interventions for improving cognition and school achievement in children and adolescents with obesity or overweight. <i>Cochrane Database Syst Rev</i> . 2018;3:CD009728. PMID: 29499084 | Population                                       |
| 225. Martínez-Rodríguez A, Cumbicus-Jiménez Y, Cuestas-Calero BJ, Leyva-Vela B. Nutrition and Boxing Performance. <i>Nutrition today</i> . 2017;52(6):295-307. DOI: vdc.100052191563.0x000001                                                                                                               | Population                                       |
| 226. Matson RI, Perry R, Hunt LP, et al. Change in obesity-related metabolic abnormalities associated with body mass index improvement through life-style intervention: A meta-regression. <i>Pediatr Diabetes</i> . 2020;21(2):173-193. PMID: 31820534                                                     | Population                                       |
| 227. Matsuyama M, Harb T, David M, Davies PS, Hill RJ. Effect of fortified milk on growth and nutritional status in young children: a systematic review and meta-analysis. <i>Public Health Nutr</i> . 2017;20(7):1214-1225. PMID: 27938461                                                                 | Population                                       |
| 228. Matsuzaki M, Sanchez BN, Acosta ME, Botkin J, Sanchez-Vaznaugh EV. Food environment near schools and body weight-A systematic review of associations by race/ethnicity, gender, grade, and socio-economic factors. <i>Obes Rev</i> . 2020;21(4):e12997. PMID: 32026567                                 | No meta-analysis or graded certainty of evidence |
| 229. Matwiejczyk L, Mehta K, Scott J, Tonkin E, Coveney J. Characteristics of Effective Interventions Promoting Healthy Eating for Pre-Schoolers in Childcare Settings: An Umbrella Review. <i>Nutrients</i> . 2018;10(3). PMID: 29494537                                                                   | Study Design                                     |

| Articles                                                                                                                                                                                                                                                                                                                                 | Reason for Exclusion                             |
|------------------------------------------------------------------------------------------------------------------------------------------------------------------------------------------------------------------------------------------------------------------------------------------------------------------------------------------|--------------------------------------------------|
| 230.Mayer-Davis EJ, Kahkoska AR, Jefferies C, et al. ISPAD Clinical Practice Consensus Guidelines 2018: Definition, epidemiology, and classification of diabetes in children and adolescents. <i>Pediatr Diabetes</i> . 2018;19 Suppl 27:7-19. PMID: 30226024                                                                            | Study Design                                     |
| 231.Mazur A, Caroli M, Radziewicz-Winnicki I, et al. Reviewing and addressing the link between mass media and the increase in obesity among European children: The European Academy of Paediatrics (EAP) and The European Childhood Obesity Group (ECOG) consensus statement. <i>Acta Paediatr</i> . 2018;107(4):568-576. PMID: 29164673 | Study Design                                     |
| 232. McHugh C, Hurst A, Bethel A, Lloyd J, Logan S, Wyatt K. The impact of the World Health Organization Health Promoting Schools framework approach on diet and physical activity behaviours of adolescents in secondary schools: a systematic review. <i>Public health</i> . 2020;182:116-124.                                         | No meta-analysis or graded certainty of evidence |
| 233.Mead E, Brown T, Rees K, et al. Diet, physical activity and behavioural interventions for the treatment of overweight or obese children from the age of 6 to 11 years. <i>Cochrane Database Syst Rev</i> . 2017;6:CD012651. PMID: 28639319                                                                                           | Population                                       |
| 234.Mead LC, Hill AM, Carter S, Coates AM. The Effect of Nut Consumption on Diet Quality, Cardiometabolic and Gastrointestinal Health in Children: A Systematic Review of Randomized Controlled Trials. <i>Int J Environ Res Public Health</i> . 2021;18(2). PMID: 33430029                                                              | No nutrition intervention of interest            |
| 235.Mehrabani S, Askari G, Miraghajani M, Tavakoly R, Arab A. Effect of coenzyme Q10 supplementation on fatigue: A systematic review of interventional studies. <i>Complement Ther Med</i> . 2019;43:181-187. PMID: 30935528                                                                                                             | Population                                       |
| 236.Mena-Sanchez G, Becerra-Tomas N, Babio N, Salas-Salvado J. Dairy Product Consumption in the Prevention of Metabolic Syndrome: A Systematic Review and Meta-Analysis of Prospective Cohort Studies. <i>Adv Nutr</i> . 2019;10(suppl_2):S144-S153. PMID: 31089736                                                                      | Population                                       |
| 237.Merhej R. Dehydration and cognition: an understated relation. <i>International Journal of Health Governance</i> . 2018;24(1):19-30. DOI: 10.1108/IJHG-10-2018-0056                                                                                                                                                                   | SR does not have 2 databases or ROB assessment   |
| 238.Micha R, Karageorgou D, Bakogianni I, et al. Effectiveness of school food environment policies on children's dietary behaviors: A systematic review and meta-analysis. <i>PLoS One</i> . 2018;13(3):e0194555. PMID: 29596440                                                                                                         | Outcome                                          |
| 239.Militello LK, Kelly S, Melnyk BM, Smith L, Petosa R. A Review of Systematic Reviews Targeting the Prevention and Treatment of Overweight and Obesity in Adolescent Populations. <i>J Adolesc Health</i> . 2018;63(6):675-687. PMID: 30314864                                                                                         | Study Design                                     |

| Articles                                                                                                                                                                                                                                                                           | Reason for Exclusion                             |
|------------------------------------------------------------------------------------------------------------------------------------------------------------------------------------------------------------------------------------------------------------------------------------|--------------------------------------------------|
| 240.Montgomery SC, Donnelly M, Bhatnagar P, Carlin A, Kee F, Hunter RF. Peer social network processes and adolescent health behaviors: A systematic review. <i>Prev Med.</i> 2020;130:105900. PIMD: 31733224                                                                       | Population                                       |
| 241.Monzani A, Ricotti R, Caputo M, et al. A Systematic Review of the Association of Skipping Breakfast with Weight and Cardiometabolic Risk Factors in Children and Adolescents. What Should We Better Investigate in the Future? <i>Nutrients.</i> 2019;11(2). PMID: 30781797    | Study Design                                     |
| 242.Moore SG, Donnelly JK, Jones S, Cade JE. Effect of Educational Interventions on Understanding and Use of Nutrition Labels: A Systematic Review. <i>Nutrients.</i> 2018;10(10). PMID: 30287766                                                                                  | Population                                       |
| 243.Moreno JP, Vezina-Im LA, Vaughan EM, Baranowski T. Impact of child summertime obesity interventions on body mass index, and weight-related behaviours: a systematic review and meta-analysis protocol. <i>BMJ Open.</i> 2017;7(10):e017144. PMID: 29061614                     | Study Design                                     |
| 244.Morgan PJ, Young MD, Lloyd AB, et al. Involvement of Fathers in Pediatric Obesity Treatment and Prevention Trials: A Systematic Review. <i>Pediatrics.</i> 2017;139(2). PMID: 28130430                                                                                         | SR does not have 2 databases or ROB assessment   |
| 245.Moynihan P, Tanner LM, Holmes RD, et al. Systematic Review of Evidence Pertaining to Factors That Modify Risk of Early Childhood Caries. <i>JDR Clin Trans Res.</i> 2019;4(3):202-216. PMID: 30931717                                                                          | Outcome                                          |
| 246.Murimi MW, Kanyi M, Mupfudze T, Amin MR, Mbogori T, Aldubayan K. Factors Influencing Efficacy of Nutrition Education Interventions: A Systematic Review. <i>J Nutr Educ Behav.</i> 2017;49(2):142-165 e141. PMID: 27814976                                                     | Population                                       |
| 247.Murimi MW, Moyeda-Carabaza AF, Nguyen B, Saha S, Amin R, Njike V. Factors that contribute to effective nutrition education interventions in children: a systematic review. <i>Nutr Rev.</i> 2018;76(8):553-580. PMID: 29800311                                                 | No meta-analysis or graded certainty of evidence |
| 248.Murray M, Dordevic AL, Bonham MP. Systematic Review and Meta-Analysis: The Impact of Multicomponent Weight Management Interventions on Self-Esteem in Overweight and Obese Adolescents. <i>J Pediatr Psychol.</i> 2017;42(4):379-394. PMID:28340156                            | Population                                       |
| 249.Musa-Veloso K, Venditti C, Lee HY, et al. Systematic review and meta-analysis of controlled intervention studies on the effectiveness of long-chain omega-3 fatty acids in patients with nonalcoholic fatty liver disease. <i>Nutr Rev.</i> 2018;76(8):581-602. PMID: 29917092 | Population                                       |

| Articles                                                                                                                                                                                                                                                                                               | Reason for Exclusion                             |
|--------------------------------------------------------------------------------------------------------------------------------------------------------------------------------------------------------------------------------------------------------------------------------------------------------|--------------------------------------------------|
| 250.Muth ND, Dietz WH, Magge SN, et al. Public Policies to Reduce Sugary Drink Consumption in Children and Adolescents. <i>Pediatrics</i> . 2019;143(4). PMID: 30910915                                                                                                                                | Study Design                                     |
| 251.Muzaffar H, Metcalfe JJ, Fiese B. Narrative Review of Culinary Interventions with Children in Schools to Promote Healthy Eating: Directions for Future Research and Practice. <i>Curr Dev Nutr</i> . 2018;2(6):nzy016. PMID: 29955728                                                              | No meta-analysis or graded certainty of evidence |
| 252. Narciso J, Silva AJ, Roderigues V, et al. Behavioral, contextual and biological factors associated with obesity during adolescence: A systematic review. <i>PLoS ONE</i> 2019;14(4):e0214941.                                                                                                     | Study Design                                     |
| 253.Nathan N, Janssen L, Sutherland R, et al. The effectiveness of lunchbox interventions on improving the foods and beverages packed and consumed by children at centre-based care or school: a systematic review and meta-analysis. <i>Int J Behav Nutr Phys Act</i> . 2019;16(1):38. PMID: 31036038 | Outcome                                          |
| 254.Naude CE, Visser ME, Nguyen KA, Durao S, Schoonees A. Effects of total fat intake on bodyweight in children. <i>Cochrane Database Syst Rev</i> . 2018;7:CD012960. PMID: 29974953                                                                                                                   | No nutrition intervention of interest            |
| 255.Naumann J, Biehler D, Luty T, Sadaghiani C. Prevention and Therapy of Type 2 Diabetes-What Is the Potential of Daily Water Intake and Its Mineral Nutrients? <i>Nutrients</i> . 2017;9(8). PMID: 28829398                                                                                          | SR does not have 2 databases or ROB assessment   |
| 256.Nekitsing C, Blundell-Birtill P, Cockcroft JE, Hetherington MM. Systematic review and meta-analysis of strategies to increase vegetable consumption in preschool children aged 2-5 years. <i>Appetite</i> . 2018;127:138-154. PMID: 29702128                                                       | Outcome                                          |
| 257.Newberry SJ, Chung M, Anderson C A.M., et al. <i>Sodium and Potassium Intake: Effects on Chronic Disease Outcomes and Risks</i> . Rockville (MD): Agency for Healthcare Research and Quality (US); June 2018. PMID: 30125063                                                                       | Outcome                                          |
| 258.Nikbakht E, Khalesi S, Singh I, Williams LT, West NP, Colson N. Effect of probiotics and synbiotics on blood glucose: a systematic review and meta-analysis of controlled trials. <i>Eur J Nutr</i> . 2018;57(1):95-106. PMID: 27590729                                                            | Population                                       |
| 259.Nissensohn M, Fuentes Lugo D, Serra-Majem L. Sugar-sweetened beverage consumption and obesity in children's meta-analyses: reaching wrong answers for right questions. <i>Nutr Hosp</i> . 2018;35(2):474-488. PMID: 29756984                                                                       | Study Design                                     |
| 260.Nissensohn M, Fuentes Lugo D, Serra-Majem L. Sugar-sweetened beverage consumption and obesity in children's meta-analyses: reaching wrong answers for right questions. <i>Nutr Hosp</i> . 2018;35(2):474-488. PMID: 29756984                                                                       | Other                                            |

| Articles                                                                                                                                                                                                                                                                                                                                | Reason for Exclusion                           |
|-----------------------------------------------------------------------------------------------------------------------------------------------------------------------------------------------------------------------------------------------------------------------------------------------------------------------------------------|------------------------------------------------|
| 261.Noronha JC, Braunstein CR, Blanco Mejia S, et al. The Effect of Small Doses of Fructose and Its Epimers on Glycemic Control: A Systematic Review and Meta-Analysis of Controlled Feeding Trials. <i>Nutrients</i> . 2018;10(11). PMID: 30463314                                                                                     | Population                                     |
| 262.Nour M, Yeung SH, Partridge S, Allman-Farinelli M. A Narrative Review of Social Media and Game-Based Nutrition Interventions Targeted at Young Adults. <i>J Acad Nutr Diet</i> . 2017;117(5):735-752 e710. PMID: 28238894                                                                                                           | Population                                     |
| 263.Omiwole M, Richardson C, Huniewicz P, Dettmer E, Paslakis G. Review of Mindfulness-Related Interventions to Modify Eating Behaviors in Adolescents. <i>Nutrients</i> . 2019;11(12). PMID: 31810307                                                                                                                                  | SR does not have 2 databases or ROB assessment |
| 264.Ong JX, Ullah S, Magarey A, Miller J, Leslie E. Relationship between the home environment and fruit and vegetable consumption in children aged 6-12 years: a systematic review. <i>Public Health Nutr</i> . 2017;20(3):464-480. PMID: 2869044                                                                                       | Outcome                                        |
| 265.Onvani S, Haghighatdoost F, Surkan PJ, Larijani B, Azadbakht L. Adherence to the Healthy Eating Index and Alternative Healthy Eating Index dietary patterns and mortality from all causes, cardiovascular disease and cancer: a meta-analysis of observational studies. <i>J Hum Nutr Diet</i> . 2017;30(2):216-226. PMID: 27620213 | Population                                     |
| 266.Oosterhoff M, Bosma H, van Schayck OCP, Evers S, Dirksen CD, Joore MA. A systematic review on economic evaluations of school-based lifestyle interventions targeting weight-related behaviours among 4-12year olds: Issues and ways forward. <i>Prev Med</i> . 2018;114:115-122. PMID: 29959951                                     | SR does not have 2 databases or ROB assessment |
| 267.Opie RS, Itsiopoulos C, Parletta N, et al. Dietary recommendations for the prevention of depression. <i>Nutr Neurosci</i> . 2017;20(3):161-171. PMID: 26317148                                                                                                                                                                      | Study Design                                   |
| 268.O'Sullivan TA, Schmidt KA, Kratz M. Whole-Fat or Reduced-Fat Dairy Product Intake, Adiposity, and Cardiometabolic Health in Children: A Systematic Review. <i>Adv Nutr</i> . 2020;11(4):928-950. PMID: 32119732                                                                                                                     | SR does not have 2 databases or ROB assessment |
| 269.Parohan M, Sadeghi A, Nasiri M, et al. Dietary acid load and risk of hypertension: A systematic review and dose-response meta-analysis of observational studies. <i>Nutr Metab Cardiovasc Dis</i> . 2019;29(7):665-675. PMID: 31153745                                                                                              | Population                                     |
| 270.Patel AI, Moghadam SD, Freedman M, Hazari A, Fang ML, Allen IE. The association of flavored milk consumption with milk and energy intake, and obesity: A systematic review. <i>Prev Med</i> . 2018;111:151-162. PMID: 29501475                                                                                                      | Outcome                                        |

| Articles                                                                                                                                                                                                                                                                                                             | Reason for Exclusion                           |
|----------------------------------------------------------------------------------------------------------------------------------------------------------------------------------------------------------------------------------------------------------------------------------------------------------------------|------------------------------------------------|
| 271. Patel C, Karasouli E, Shuttlewood E, Meyer C. Food Parenting Practices among Parents with Overweight and Obesity: A Systematic Review. <i>Nutrients</i> . 2018;10(12). PMID: 30545102                                                                                                                           | Population                                     |
| 272. Patseadou M, Haller DM. Vitamin D in Adolescents: A Systematic Review and Narrative Synthesis of Available Recommendations. <i>J Adolesc Health</i> . 2020;66(4):388-407. PMID: 31685374                                                                                                                        | SR does not have 2 databases or ROB assessment |
| 273. Paula Bricarello L, Poltronieri F, Fernandes R, Retondario A, de Moraes Trindade EBS, de Vasconcelos FAG. Effects of the Dietary Approach to Stop Hypertension (DASH) diet on blood pressure, overweight and obesity in adolescents: A systematic review. <i>Clin Nutr ESPEN</i> . 2018;28:1-11. PMID: 30390863 | Study Design                                   |
| 274. Pawlak R, Bell K. Iron Status of Vegetarian Children: A Review of Literature. <i>Ann Nutr Metab</i> . 2017;70(2):88-99. PMID: 28319940                                                                                                                                                                          | SR does not have 2 databases or ROB assessment |
| 275. Payne JE, Turk MT, Kalarchian MA, Pellegrini CA. Defining Adherence to Dietary Self-Monitoring Using a Mobile App: A Narrative Review. <i>J Acad Nutr Diet</i> . 2018;118(11):2094-2119. PMID: 30115555                                                                                                         | Population                                     |
| 276. Pena-Rosas JP, Mithra P, Unnikrishnan B, et al. Fortification of rice with vitamins and minerals for addressing micronutrient malnutrition. <i>Cochrane Database Syst Rev</i> . 2019;2019(10). PMID: 31684687                                                                                                   | Other                                          |
| 277. Perez-Cueto FJA. An Umbrella Review of Systematic Reviews on Food Choice and Nutrition Published between 2017 and-2019. <i>Nutrients</i> . 2019;11(10). PMID: 31591373                                                                                                                                          | SR does not have 2 databases or ROB assessment |
| 278. Pfeiffle S, Pellegrino F, Kruseman M, et al. Current Recommendations for Nutritional Management of Overweight and Obesity in Children and Adolescents: A Structured Framework. <i>Nutrients</i> . 2019;11(2). PMID: 30744122                                                                                    | Population                                     |
| 279. Pfander M, Heise TL, Hilton Boon M, et al. Taxation of unprocessed sugar or sugar-added foods for reducing their consumption and preventing obesity or other adverse health outcomes. <i>Cochrane Database Syst Rev</i> . 2020;4:CD012333. PMID: 32270494                                                       | Population                                     |
| 280. Piccoli de Mello P, Eifer DA, Daniel de Mello E. Use of fibers in childhood constipation treatment: systematic review with meta-analysis. <i>J Pediatr (Rio J)</i> . 2018;94(5):460-470. PMID: 29474804                                                                                                         | Outcome                                        |

| Articles                                                                                                                                                                                                                                                                            | Reason for Exclusion                             |
|-------------------------------------------------------------------------------------------------------------------------------------------------------------------------------------------------------------------------------------------------------------------------------------|--------------------------------------------------|
| 281.Pihoker C, Forsander G, Fantahun B, et al. ISPAD Clinical Practice Consensus Guidelines 2018: The delivery of ambulatory diabetes care to children and adolescents with diabetes. <i>Pediatr Diabetes</i> . 2018;19 Suppl 27:84-104. PMID: 30144259                             | Study Design                                     |
| 282.Pinto de Jesus MC, Souza Braga VA, da Silva Pinheiro AP, et al. ACTIONS OF NURSES DIRECTED AT OBESE TEENS IN PRIMARY CARE. <i>Journal of Nursing UFPE</i> . 2019;13:729-739. DOI: 10.5205/1981-8963.2019.240871                                                                 | SR does not have 2 databases or ROB assessment   |
| 283.Policy on Dietary Recommendations for Infants, Children, and Adolescents. <i>Pediatr Dent</i> . 2018;40(6):65-67. PMID: 32074854                                                                                                                                                | Study Design                                     |
| 284.Policy on Snacks and Beverages Sold in Schools. <i>Pediatr Dent</i> . 2018;40(6):68-69. PMID: 32074855                                                                                                                                                                          | Study Design                                     |
| 285.Policy on Use of Fluoride. <i>Pediatr Dent</i> . 2018;40(6):49-50. PMID: 32074848                                                                                                                                                                                               | Study Design                                     |
| 286.Pongutta S, Ajetunmobi O, Davey C, Ferguson E, Lin L. Impacts of School Nutrition Interventions on the Nutritional Status of School-Aged Children in Asia: A Systematic Review and Meta-Analysis. <i>Nutrients</i> . 2022;14(3).                                                | Population                                       |
| 287.Porter A, Kipping R, Summerbell C, Dobrescu A, Johnson L. What guidance is there on portion size for feeding preschool-aged children (1 to 5 years) in the United Kingdom and Ireland? A systematic grey literature review. <i>Obes Rev</i> . 2020;21(7):e13021. PMID: 32219990 | Study Design                                     |
| 288.Pourabbasi A, Ebrahimnegad Shirvani MS, Shams AH. Does Islamic fasting affect cognitive functions in adolescents? A systematic review. <i>J Pak Med Assoc</i> . 2019;69(8):1164-1169. PMID: 31431772                                                                            | Outcome                                          |
| 289.Pratt CA, Loria CM, Arteaga SS, et al. A Systematic Review of Obesity Disparities Research. <i>Am J Prev Med</i> . 2017;53(1):113-122. PMID: 28341221                                                                                                                           | SR does not have 2 databases or ROB assessment   |
| 290.Prescott MP, Cleary R, Bonanno A, Costanigro M, Jablonski BBR, Long AB. Farm to School Activities and Student Outcomes: A Systematic Review. <i>Adv Nutr</i> . 2020;11(2):357-374. PMID: 32173754                                                                               | No meta-analysis or graded certainty of evidence |

| Articles                                                                                                                                                                                                                                             | Reason for Exclusion                           |
|------------------------------------------------------------------------------------------------------------------------------------------------------------------------------------------------------------------------------------------------------|------------------------------------------------|
| 291.Price C, Cohen D, Pribis P, Cerami J. Nutrition Education and Body Mass Index in Grades K-12: A Systematic Review. <i>J Sch Health</i> . 2017;87(9):715-720. PMID: 28766320                                                                      | SR does not have 2 databases or ROB assessment |
| 292.Psaltopoulou T, Tzanninis S, Ntanasis-Stathopoulos I, et al. Prevention and treatment of childhood and adolescent obesity: a systematic review of meta-analyses. <i>World J Pediatr</i> . 2019;15(4):350-381. PMID: 31313240                     | SR does not have 2 databases or ROB assessment |
| 293.Quelly SB. Helping With Meal Preparation and Children's Dietary Intake: A Literature Review. <i>J Sch Nurs</i> . 2019;35(1):51-60. PMID: 29895188                                                                                                | SR does not have 2 databases or ROB assessment |
| 294.Qutteina Y, De Backer C, Smits T. Media food marketing and eating outcomes among pre-adolescents and adolescents: A systematic review and meta-analysis. <i>Obes Rev</i> . 2019;20(12):1708-1719. PMID: 31468652                                 | Outcome                                        |
| 295.Rageliene T, Gronhoj A. The influence of peers' and siblings' on children's and adolescents' healthy eating behavior. A systematic literature review. <i>Appetite</i> . 2020;148:104592. PMID: 31927070                                          | No nutrition intervention of interest          |
| 296.Raine KD, Atkey K, Olstad DL, et al. Healthy food procurement and nutrition standards in public facilities: evidence synthesis and consensus policy recommendations. <i>Health Promot Chronic Dis Prev Can</i> . 2018;38(1):6-17. PMID: 29323862 | Study Design                                   |
| 297.Rajjo T, Mohammed K, Alsawas M, et al. Treatment of Pediatric Obesity: An Umbrella Systematic Review. <i>J Clin Endocrinol Metab</i> . 2017;102(3):763-775. PMID: 28359101                                                                       | Population                                     |
| 298.Ranchordas MK, Rogerson D, Soltani H, Costello JT. Antioxidants for preventing and reducing muscle soreness after exercise. <i>Cochrane Database Syst Rev</i> . 2017;12:CD009789. PMID: 29238948                                                 | Population                                     |
| 299.Rangel-Huerta OD, Gil A. Effect of omega-3 fatty acids on cognition: an updated systematic review of randomized clinical trials. <i>Nutr Rev</i> . 2018;76(1):1-20. PMID: 29240924                                                               | SR does not have 2 databases or ROB assessment |
| 300.Reale S, Hamilton J, Akparibo R, Hetherington MM, Cecil JE, Caton SJ. The effect of food type on the portion size effect in children aged 2-12 years: A systematic review and meta-analysis. <i>Appetite</i> . 2019;137:47-61. PMID: 30779929    | Outcome                                        |
| 301.Redondo M, Hernandez-Aguado I, Lumbreras B. The impact of the tax on sweetened beverages: a systematic review. <i>Am J Clin Nutr</i> . 2018;108(3):548-563. PMID: 30535085                                                                       | Population                                     |



| Articles                                                                                                                                                                                                                                                                             | Reason for Exclusion                           |
|--------------------------------------------------------------------------------------------------------------------------------------------------------------------------------------------------------------------------------------------------------------------------------------|------------------------------------------------|
| 302.Rhee EJ, Kim HC, Kim JH, et al. 2018 Guidelines for the management of dyslipidemia. <i>Korean J Intern Med.</i> 2019;34(4):723-771. PMID: 31272142                                                                                                                               | Study Design                                   |
| 303.Ribeiro de Vasconcelos CM, Ribeiro de Vasconcelos EM, Gorete Lucena de Vasconcelos M, et al. EDUCATIONAL INTERVENTIONS IN THE PROMOTION OF HEALTHY EATING IN SCHOOLS. <i>Journal of Nursing UFPE.</i> 2018;12(10):2803-2815. DOI: 10.5205/1981-8963-v12i10a237682p2803-2815-2018 | SR does not have 2 databases or ROB assessment |
| 304.Roberts JL, Stein AD. The Impact of Nutritional Interventions beyond the First 2 Years of Life on Linear Growth: A Systematic Review and Meta-Analysis. <i>Adv Nutr.</i> 2017;8(2):323-336. PMID: 28298275                                                                       | Outcome                                        |
| 305.Robson SM, McCullough MB, Rex S, Munafo MR, Taylor G. Family Meal Frequency, Diet, and Family Functioning: A Systematic Review With Meta-analyses. <i>J Nutr Educ Behav.</i> 2020;52(5):553-564. PMID: 31982371                                                                  | Study Design                                   |
| 306.Rocha NP, Milagres LC, Longo GZ, Ribeiro AQ, Novaes JF. Association between dietary pattern and cardiometabolic risk in children and adolescents: a systematic review. <i>J Pediatr (Rio J).</i> 2017;93(3):214-222. PMID: 28238682                                              | SR does not have 2 databases or ROB assessment |
| 307.Rodriguez Rocha NP, Kim H. eHealth Interventions for Fruit and Vegetable Intake: A Meta-Analysis of Effectiveness. <i>Health Educ Behav.</i> 2019;46(6):947-959. PMID: 31347403                                                                                                  | Outcome                                        |
| 308.Rogers MA, Lemmen K, Kramer R, Mann J, Chopra V. Internet-Delivered Health Interventions That Work: Systematic Review of Meta-Analyses and Evaluation of Website Availability. <i>J Med Internet Res.</i> 2017;19(3):e90. PMID: 28341617                                         | SR does not have 2 databases or ROB assessment |
| 309.Rose T, Barker M, Maria Jacob C, et al. A Systematic Review of Digital Interventions for Improving the Diet and Physical Activity Behaviors of Adolescents. <i>J Adolesc Health.</i> 2017;61(6):669-677. PMID: 28822682                                                          | Outcome                                        |
| 310.Rosettie KL, Micha R, Cudhea F, et al. Comparative risk assessment of school food environment policies and childhood diets, childhood obesity, and future cardiometabolic mortality in the United States. <i>PLoS One.</i> 2018;13(7):e0200378. PMID: 29979761                   | Study Design                                   |
| 311.Rouhani MH, Rashidi-Pourfard N, Salehi-Abargouei A, Karimi M, Haghghatdoost F. Effects of Egg Consumption on Blood Lipids: A Systematic Review and Meta-Analysis of Randomized Clinical Trials. <i>J Am Coll Nutr.</i> 2018;37(2):99-110. PMID: 29111915                         | Population                                     |

| Articles                                                                                                                                                                                                                                                                          | Reason for Exclusion                           |
|-----------------------------------------------------------------------------------------------------------------------------------------------------------------------------------------------------------------------------------------------------------------------------------|------------------------------------------------|
| 312. Russell SJ, Croker H, Viner RM. The effect of screen advertising on children's dietary intake: A systematic review and meta-analysis. <i>Obes Rev.</i> 2019;20(4):554-568. PMID: 30576057                                                                                    | Outcome                                        |
| 313. Saavedra Dias R, Barros AN, Silva AJ, et al. The effect of school intervention programs on the body mass index of adolescents: a systematic review with meta-analysis. <i>Health Educ Res.</i> 2020;35(5):396-406. PMID: 32772070                                            | No nutrition intervention of interest          |
| 314. Sacco J, Lillico HG, Chen E, Hobin E. The influence of menu labelling on food choices among children and adolescents: a systematic review of the literature. <i>Perspect Public Health.</i> 2017;137(3):173-181. PMID: 27436235                                              | Outcome                                        |
| 315. Saini V, Jessel J, Iannaccone JA, Agnew C. Efficacy of functional analysis for informing behavioral treatment of inappropriate mealtime behavior: A systematic review and meta-analysis. <i>Behavioral interventions.</i> 2019;34(2):231-247. DOI: vdc.100083009162.0x000001 | SR does not have 2 databases or ROB assessment |
| 316. Santos JAR, Christoforou A, Trieu K, et al. Iodine fortification of foods and condiments, other than salt, for preventing iodine deficiency disorders. <i>Cochrane Database Syst Rev.</i> 2019;2:CD010734. PMID: 30746700                                                    | No nutrition intervention of interest          |
| 317. Savoie-Roskos MR, Wengreen H, Durward C. Increasing Fruit and Vegetable Intake among Children and Youth through Gardening-Based Interventions: A Systematic Review. <i>J Acad Nutr Diet.</i> 2017;117(2):240-250. PMID: 27964852                                             | Outcome                                        |
| 318. Schaap R, Bessems K, Otten R, Kremers S, van Nassau F. Measuring implementation fidelity of school-based obesity prevention programmes: a systematic review. <i>Int J Behav Nutr Phys Act.</i> 2018;15(1):75. PMID: 30103764                                                 | No nutrition intervention of interest          |
| 319. Schneider BC, Dumith SC, Orlandi SP, Assuncao MCF. Diet and body fat in adolescence and early adulthood: a systematic review of longitudinal studies. <i>Cien Saude Colet.</i> 2017;22(5):1539-1552. PMID: 28538925                                                          | SR does not have 2 databases or ROB assessment |
| 320. Schoeppe S, Alley S, Rebar AL, et al. Apps to improve diet, physical activity and sedentary behaviour in children and adolescents: a review of quality, features and behaviour change techniques. <i>Int J Behav Nutr Phys Act.</i> 2017;14(1):83. PMID: 28646889            | No nutrition intervention of interest          |
| 321. Schurmann S, Kersting M, Alexy U. Vegetarian diets in children: a systematic review. <i>Eur J Nutr.</i> 2017;56(5):1797-1817. PMID: 28299420                                                                                                                                 | SR does not have 2 databases or ROB assessment |
| 322. Scott AM, Clark J, Julien B, et al. Probiotics for preventing acute otitis media in children. <i>Cochrane Database Syst Rev.</i> 2019;6:CD012941. PMID: 31210358                                                                                                             | Outcome                                        |

| Articles                                                                                                                                                                                                                                                                                                  | Reason for Exclusion                             |
|-----------------------------------------------------------------------------------------------------------------------------------------------------------------------------------------------------------------------------------------------------------------------------------------------------------|--------------------------------------------------|
| 323.Selvendran SS, Penney NC, Aggarwal N, Darzi AW, Purkayastha S. Treatment of Obesity in Young People-a Systematic Review and Meta-analysis. <i>Obes Surg.</i> 2018;28(8):2537-2549. PMID: 29796922                                                                                                     | Population                                       |
| 324.Serra-Majem L, Raposo A, Aranceta-Bartrina J, et al. Ibero(-)American Consensus on Low- and No-Calorie Sweeteners: Safety, Nutritional Aspects and Benefits in Food and Beverages. <i>Nutrients.</i> 2018;10(7). PMID: 29941818                                                                       | Other                                            |
| 325.Seward K, Finch M, Yoong SL, et al. Factors that influence the implementation of dietary guidelines regarding food provision in centre based childcare services: A systematic review. <i>Prev Med.</i> 2017;105:197-205. PMID: 28965755                                                               | SR does not have 2 databases or ROB assessment   |
| 326.Shahmirzadi MS, Barati L. Treatment of Nonalcoholic Fatty Liver Disease in Children: A Systematic Review. <i>Journal of Pediatrics Review.</i> 2018;6(2):21-28. DOI: 10.5812/jpr.11635                                                                                                                | SR does not have 2 databases or ROB assessment   |
| 327.Shin Y, Kim SK, Lee M. Mobile phone interventions to improve adolescents' physical health: A systematic review and meta-analysis. <i>Public Health Nurs.</i> 2019;36(6):787-799.                                                                                                                      | No nutrition intervention of interest            |
| 328.Shirazi MG, Kazemi A, Kelishadi R, Mostafavi F. A Review on Determinants of Nutritional Behavior in Teenagers. <i>IRANIAN JOURNAL OF PEDIATRICS.</i> 2017;27(3). DOI: 10.5812/ijp.6454                                                                                                                | SR does not have 2 databases or ROB assessment   |
| 329.Silden KE. Impact of competitive foods in public schools on child nutrition: effects on adolescent obesity in the United States an integrative systematic literature review. <i>Glob Health Action.</i> 2018;11(1):1477492. PMID: 29893188                                                            | Study Design                                     |
| 330.Silva Neto LGR, Santos Neto JED, Bueno NB, de Oliveira SL, Ataíde TDR. Effects of iron supplementation versus dietary iron on the nutritional iron status: Systematic review with meta-analysis of randomized controlled trials. <i>Crit Rev Food Sci Nutr.</i> 2019;59(16):2553-2561. PMID: 29611716 | Outcome                                          |
| 331.Singh A, Bassi S, Nazar GP, et al. Impact of school policies on non-communicable disease risk factors - a systematic review. <i>BMC Public Health.</i> 2017;17(1):292.                                                                                                                                | No meta-analysis or graded certainty of evidence |
| 332.Smart CE, Annan F, Higgins LA, Jelleryd E, Lopez M, Acerini CL. ISPAD Clinical Practice Consensus Guidelines 2018: Nutritional management in children and adolescents with diabetes. <i>Pediatr Diabetes.</i> 2018;19 Suppl 27:136-154. PMID: 30062718                                                | Study Design                                     |

| Articles                                                                                                                                                                                                                                                                              | Reason for Exclusion                             |
|---------------------------------------------------------------------------------------------------------------------------------------------------------------------------------------------------------------------------------------------------------------------------------------|--------------------------------------------------|
| 333.Smith R, Kelly B, Yeatman H, Boyland E. Food Marketing Influences Children's Attitudes, Preferences and Consumption: A Systematic Critical Review. <i>Nutrients</i> . 2019;11(4). PMID: 31003489                                                                                  | Outcome                                          |
| 334.Snuggs S, Houston-Price C, Harvey K. Healthy eating interventions delivered in the family home: A systematic review. <i>Appetite</i> . 2019;140:114-133. PMID: 31091432                                                                                                           | No meta-analysis or graded certainty of evidence |
| 335.Soares MM, Silva MA, Garcia PPC, et al. Effect of vitamin A supplementation: a systematic review. <i>Cien Saude Colet</i> . 2019;24(3):827-838. PMID: 30892504                                                                                                                    | Population                                       |
| 336.Spill MK, Callahan EH, Shapiro MJ, et al. Caregiver feeding practices and child weight outcomes: a systematic review. <i>Am J Clin Nutr</i> . 2019;109(Suppl_7):990S-1002S. PMID: 30982865                                                                                        | Population                                       |
| 337.Srbely V, Janjua I, Buchholz AC, Newton G. Interventions Aimed at Increasing Dairy and/or Calcium Consumption of Preschool-Aged Children: A Systematic Literature Review. <i>Nutrients</i> . 2019;11(4). PMID: 30934755                                                           | Outcome                                          |
| 338.Stead M, Angus K, Langley T, et al. Mass media to communicate public health messages in six health topic areas: a systematic review and other reviews of the evidence. In: <i>Public Health Research</i> . Vol 7.8. Southampton (UK): NIHR Journals Library; 2019. PMID: 31046212 | Population                                       |
| 339.St George SM, Kobayashi MA, Noriega Esquivas BS, Ocasio MA, Wagstaff RG, Dorcius DP. Pediatric Obesity Prevention and Treatment Among Hispanics: A Systematic Review and Meta-Analysis. <i>Am J Prev Med</i> . 2022;62(3):438-449.                                                | Population                                       |
| 340.Styne DM, Arslanian SA, Connor EL, et al. Pediatric Obesity-Assessment, Treatment, and Prevention: An Endocrine Society Clinical Practice Guideline. <i>J Clin Endocrinol Metab</i> . 2017;102(3):709-757. PMID: 28359099                                                         | Study Design                                     |
| 341.Suh H, Kavouras SA. Water intake and hydration state in children. <i>Eur J Nutr</i> . 2019;58(2):475-496. PMID: 30506317                                                                                                                                                          | Outcome                                          |
| 342.Suhett LG, Hermsdorff HHM, Cota BC, et al. Dietary inflammatory potential, cardiometabolic risk and inflammation in children and adolescents: a systematic review. <i>Crit Rev Food Sci Nutr</i> . 2021;61(3):407-416. PMID: 32156146                                             | Study Design                                     |

| Articles                                                                                                                                                                                                                                          | Reason for Exclusion                             |
|---------------------------------------------------------------------------------------------------------------------------------------------------------------------------------------------------------------------------------------------------|--------------------------------------------------|
| 343. Suthers R, Broom M, Beck E. Key Characteristics of Public Health Interventions Aimed at Increasing Whole Grain Intake: A Systematic Review. <i>J Nutr Educ Behav</i> . 2018;50(8):813-823. PMID: 30076022                                    | Population                                       |
| 344. Sutter C, Metcalfe JJ, Tucker L, et al. Defining Food Education Standards through Consensus: The Pilot Light Food Education Summit. <i>J Sch Health</i> . 2019;89(12):994-1003. PMID: 31612490                                               | Study Design                                     |
| 345. Swartz H. Produce Rx Programs for Diet-Based Chronic Disease Prevention. <i>AMA J Ethics</i> . 2018;20(10):E960-973. PMID: 30346924                                                                                                          | SR does not have 2 databases or ROB assessment   |
| 346. Tabatabaei-Malazy O, Ardeshirlarijani E, Namazi N, Nikfar S, Jalili RB, Larijani B. Dietary antioxidative supplements and diabetic retinopathy; a systematic review. <i>J Diabetes Metab Disord</i> . 2019;18(2):705-716. PMID: 31890694     | Population                                       |
| 347. Taghizadeh S, Farhangi MA. The effectiveness of pediatric obesity prevention policies: a comprehensive systematic review and dose-response meta-analysis of controlled clinical trials. <i>J Transl Med</i> . 2020;18(1):480. PMID: 33317542 | No nutrition intervention of interest            |
| 348. Tahmassebi JF, BaniHani A. Impact of soft drinks to health and economy: a critical review. <i>Eur Arch Paediatr Dent</i> . 2020;21(1):109-117. PMID: 31177478                                                                                | SR does not have 2 databases or ROB assessment   |
| 349. Tam R, Beck KL, Manore MM, Gifford J, Flood VM, O'Connor H. Effectiveness of Education Interventions Designed to Improve Nutrition Knowledge in Athletes: A Systematic Review. <i>Sports Med</i> . 2019;49(11):1769-1786. PMID: 31372860     | Population                                       |
| 350. Tamayo MC, Dobbs PD, Pincu Y. Family-Centered Interventions for Treatment and Prevention of Childhood Obesity in Hispanic Families: A Systematic Review. <i>J Community Health</i> . 2021;46(3):635-643. PMID: 32734580                      | No meta-analysis or graded certainty of evidence |
| 351. Te Morenga L, Montez JM. Health effects of saturated and trans-fatty acid intake in children and adolescents: Systematic review and meta-analysis. <i>PLoS One</i> . 2017;12(11):e0186672. PMID: 29149184                                    | Population                                       |
| 352. Temiz G, Isil O. Factors Affecting Healthy Life Style Behaviors in Adolescents; Eating Disorders: A Systematic Review. <i>INT J CARING SCI</i> . 2018;11(3):1352-1361.                                                                       | SR does not have 2 databases or ROB assessment   |

| Articles                                                                                                                                                                                                                                                                                                        | Reason for Exclusion                             |
|-----------------------------------------------------------------------------------------------------------------------------------------------------------------------------------------------------------------------------------------------------------------------------------------------------------------|--------------------------------------------------|
| 353. Teng M, Zhao YJ, Khoo AL, Yeo TC, Yong QW, Lim BP. Impact of coconut oil consumption on cardiovascular health: a systematic review and meta-analysis. <i>Nutr Rev.</i> 2020;78(3):249-259. PMID: 31769848                                                                                                  | Population                                       |
| 354. Teoh SL, Lai NM, Vanichkulpitak P, Vuksan V, Ho H, Chaiyakunapruk N. Clinical evidence on dietary supplementation with chia seed ( <i>Salvia hispanica</i> L.): a systematic review and meta-analysis. <i>Nutr Rev.</i> 2018;76(4):219-242. PMID: 29452425                                                 | Population                                       |
| 355. Thompson KL, Chung M, Handu D, et al. The Effectiveness of Nutrition Specialists on Pediatric Weight Management Outcomes in Multicomponent Pediatric Weight Management Interventions: A Systematic Review and Exploratory Meta-Analysis. <i>J Acad Nutr Diet.</i> 2019;119(5):799-817 e743. PMID: 30833172 | Population                                       |
| 356. Tian Y, Su L, Wang J, Duan X, Jiang X. Fruit and vegetable consumption and risk of the metabolic syndrome: a meta-analysis. <i>Public Health Nutr.</i> 2018;21(4):756-765. PMID: 29151369                                                                                                                  | Outcome                                          |
| 357. Toews I, Lohner S, Kullenberg de Gaudry D, Sommer H, Meerpohl JJ. Association between intake of non-sugar sweeteners and health outcomes: systematic review and meta-analyses of randomised and non-randomised controlled trials and observational studies. <i>BMJ.</i> 2019;364:k4718. PMID: 30602577     | No nutrition intervention of interest            |
| 358. Touyz LM, Wakefield CE, Grech AM, et al. Parent-targeted home-based interventions for increasing fruit and vegetable intake in children: a systematic review and meta-analysis. <i>Nutr Rev.</i> 2018;76(3):154-173. PMID: 29319789                                                                        | Outcome                                          |
| 359. Trasande L, Shaffer RM, Sathyanarayana S, Council On Environmental H. Food Additives and Child Health. <i>Pediatrics.</i> 2018;142(2). PMID: 30037972                                                                                                                                                      | Study Design                                     |
| 360. Trieu K, McMahon E, Santos JA, et al. Review of behaviour change interventions to reduce population salt intake. <i>Int J Behav Nutr Phys Act.</i> 2017;14(1):17. PMID: 28178990                                                                                                                           | Population                                       |
| 361. Turbutt C, Richardson J, Pettinger C. The impact of hot food takeaways near schools in the UK on childhood obesity: a systematic review of the evidence. <i>J Public Health (Oxf).</i> 2019;41(2):231-239. PMID: 29590382                                                                                  | No meta-analysis or graded certainty of evidence |
| 362. Utz-Melere M, Targa-Ferreira C, Lessa-Horta B, Epifanio M, Mouzaki M, Mattos AA. Non-Alcoholic Fatty Liver Disease in Children and Adolescents: Lifestyle Change - a Systematic Review and Meta-Analysis. <i>Ann Hepatol.</i> 2018;17(3):345-354. PMID: 29735796                                           | SR does not have 2 databases or ROB assessment   |

| Articles                                                                                                                                                                                                                                                                                           | Reason for Exclusion                           |
|----------------------------------------------------------------------------------------------------------------------------------------------------------------------------------------------------------------------------------------------------------------------------------------------------|------------------------------------------------|
| 363. Valerio G, Maffei C, Saggese G, et al. Diagnosis, treatment and prevention of pediatric obesity: consensus position statement of the Italian Society for Pediatric Endocrinology and Diabetology and the Italian Society of Pediatrics. <i>Ital J Pediatr</i> . 2018;44(1):88. PMID: 30064525 | Study Design                                   |
| 364. Vallabhan MK, Jimenez EY, Nash JL, et al. Motivational Interviewing to Treat Adolescents With Obesity: A Meta-analysis. <i>Pediatrics</i> . 2018;142(5). PMID: 30348753                                                                                                                       | Population                                     |
| 365. van Baak MA, Mariman ECM. Dietary Strategies for Weight Loss Maintenance. <i>Nutrients</i> . 2019;11(8). PMID: 31443231                                                                                                                                                                       | SR does not have 2 databases or ROB assessment |
| 366. van Hoek E, Bouwman LI, Koelen MA, Lutt MAJ, Feskens EJM, Janse AJ. Development of a Dutch intervention for obese young children. <i>Health Promot Int</i> . 2017;32(4):624-635. PMID: 26755807                                                                                               | SR does not have 2 databases or ROB assessment |
| 367. Vander Wyst KB, Whisner CM, Reifsnider E, Petrov ME. The Combined Impact of Sleep and Diet on Adiposity in Infants, Toddlers, and Young Children: A Systematic Review. <i>J Dev Behav Pediatr</i> . 2019;40(3):224-236. PMID: 30741778                                                        | No nutrition intervention of interest          |
| 368. Vanderhout SM, Aglipay M, Torabi N, et al. Whole milk compared with reduced-fat milk and childhood overweight: a systematic review and meta-analysis. <i>Am J Clin Nutr</i> . 2020;111(2):266-279. PMID: 31851302                                                                             | No nutrition intervention of interest          |
| 369. Velazquez CE, Black JL, Potvin Kent M. Food and Beverage Marketing in Schools: A Review of the Evidence. <i>Int J Environ Res Public Health</i> . 2017;14(9). PMID: 28895921                                                                                                                  | SR does not have 2 databases or ROB assessment |
| 370. Vercammen KA, Frelief JM, Lowery CM, McGlone ME, Ebbeling CB, Bleich SN. A systematic review of strategies to reduce sugar-sweetened beverage consumption among 0-year to 5-year olds. <i>Obes Rev</i> . 2018;19(11):1504-1524. PMID: 3009442                                                 | Outcome                                        |
| 371. Verduci E, Martelli A, Miniello VL, et al. Nutrition in the first 1000 days and respiratory health: A descriptive review of the last five years' literature. <i>Allergol Immunopathol (Madr)</i> . 2017;45(4):405-413. PMID: 28411961                                                         | Population                                     |
| 372. Verhage CL, Gillebaart M, van der Veek SMC, Vereijken C. The relation between family meals and health of infants and toddlers: A review. <i>Appetite</i> . 2018;127:97-109. PMID: 29654851                                                                                                    | Population                                     |

| Articles                                                                                                                                                                                                                                                                                                                                                                                              | Reason for Exclusion                             |
|-------------------------------------------------------------------------------------------------------------------------------------------------------------------------------------------------------------------------------------------------------------------------------------------------------------------------------------------------------------------------------------------------------|--------------------------------------------------|
| 373. Verjans-Janssen SRB, van de Kolk I, Van Kann DHH, Kremers SPJ, Gerards S. Effectiveness of school-based physical activity and nutrition interventions with direct parental involvement on children's BMI and energy balance-related behaviors - A systematic review. <i>PLoS One</i> . 2018;13(9):e0204560. PMID: 30261057                                                                       | No meta-analysis or graded certainty of evidence |
| 374. Vezina-Im LA, Beaulieu D, Belanger-Gravel A, et al. Efficacy of school-based interventions aimed at decreasing sugar-sweetened beverage consumption among adolescents: a systematic review. <i>Public Health Nutr</i> . 2017;20(13):2416-2431. PMID: 28173882                                                                                                                                    | Outcome                                          |
| 375. Vilallonga R, Moreno Villares JM, Yeste Fernandez D, et al. Initial Approach to Childhood Obesity in Spain. A Multisociety Expert Panel Assessment. <i>Obes Surg</i> . 2017;27(4):997-1006. PMID: 27752806                                                                                                                                                                                       | Study Design                                     |
| 376. Villasana MV, Pires IM, Sa J, et al. Promotion of Healthy Nutrition and Physical Activity Lifestyles for Teenagers: A Systematic Literature Review of The Current Methodologies. <i>J Pers Med</i> . 2020;10(1). PMID: 30298750                                                                                                                                                                  | SR does not have 2 databases or ROB assessment   |
| 377. Villegas-Navas V, Montero-Simo MJ, Araque-Padilla RA. The Effects of Foods Embedded in Entertainment Media on Children's Food Choices and Food Intake: A Systematic Review and Meta-Analyses. <i>Nutrients</i> . 2020;12(4). PMID: 32244299                                                                                                                                                      | Outcome                                          |
| 378. Visser J, McLachlan MH, Maayan N, Garner P. Community-based supplementary feeding for food insecure, vulnerable and malnourished populations - an overview of systematic reviews. <i>Cochrane Database Syst Rev</i> . 2018;11:CD010578. PMID: 30480324                                                                                                                                           | Other                                            |
| 379. Viswanathan M, Treiman KA, Doto JK, Middleton JC, Coker-Schwimmer EJ, Nicholson WK. <i>Folic Acid Supplementation: An Evidence Review for the U.S. Preventive Services Task Force</i> . Rockville (MD): Agency for Healthcare Research and Quality (US; Jan 2017. Report No.: 14-05214-EF-1. PMID: 28151610                                                                                      | Population                                       |
| 380. Volpe M, Battistoni A, Gallo G, et al. Executive Summary of the 2018 Joint Consensus Document on Cardiovascular Disease Prevention in Italy. <i>High Blood Press Cardiovasc Prev</i> . 2018;25(3):327-341. PMID: 30232768                                                                                                                                                                        | Study Design                                     |
| 381. von Philipsborn P, Stratil JM, Burns J, et al. Environmental interventions to reduce the consumption of sugar-sweetened beverages and their effects on health. <i>Cochrane Database Syst Rev</i> . 2019;6:CD012292. PMID: 31194900                                                                                                                                                               | Study Design                                     |
| 382. Vos MB, Abrams SH, Barlow SE, et al. NASPGHAN Clinical Practice Guideline for the Diagnosis and Treatment of Nonalcoholic Fatty Liver Disease in Children: Recommendations from the Expert Committee on NAFLD (ECON) and the North American Society of Pediatric Gastroenterology, Hepatology and Nutrition (NASPGHAN). <i>J Pediatr Gastroenterol Nutr</i> . 2017;64(2):319-334. PMID: 28107283 | Study Design                                     |



| Articles                                                                                                                                                                                                                                                      | Reason for Exclusion                             |
|---------------------------------------------------------------------------------------------------------------------------------------------------------------------------------------------------------------------------------------------------------------|--------------------------------------------------|
| 383. Wahi G, de Souza RJ, Hartmann K, Giglia L, Jack SM, Anand SS. Effectiveness of programs aimed at obesity prevention among Indigenous children: A systematic review. <i>Prev Med Rep.</i> 2021;22:101347.                                                 | No nutrition intervention of interest            |
| 384. Walker M, McPherson AC. Weight management services for an underserved population: a rapid review of the literature. <i>Disabil Rehabil.</i> 2020;42(2):274-282. PMID: 30298750                                                                           | SR does not have 2 databases or ROB assessment   |
| 385. Wang AY, Dhaliwal J, Mouzaki M. Lean non-alcoholic fatty liver disease. <i>Clin Nutr.</i> 2019;38(3):975-981. PMID: 30466956                                                                                                                             | SR does not have 2 databases or ROB assessment   |
| 386. Wang Halpern L. Updated Pediatric Blood Pressure Guidelines: Simplified guidance may ease management of high blood pressure in children. <i>AM J NURS.</i> 2017;117(12):17. DOI: 10.1097/01.NAJ.0000527474.33127.0e                                      | Study Design                                     |
| 387. Ward AL, Reynolds AN, Kuroko S, Fangupo LJ, Galland BC, Taylor RW. Bidirectional associations between sleep and dietary intake in 0-5 year old children: A systematic review with evidence mapping. <i>Sleep Med Rev.</i> 2020;49:101231. PMID: 31783229 | Population                                       |
| 388. Ward DS, Welker E, Choate A, et al. Strength of obesity prevention interventions in early care and education settings: A systematic review. <i>Prev Med.</i> 2017;95 Suppl:S37-S52. PMID: 27693295                                                       | Outcome                                          |
| 389. Wei B, Liu Y, Lin X, Fang Y, Cui J, Wan J. Dietary fiber intake and risk of metabolic syndrome: A meta-analysis of observational studies. <i>Clin Nutr.</i> 2018;37(6 Pt A):1935-1942. PMID: 29137803                                                    | SR does not have 2 databases or ROB assessment   |
| 390. Welbourn R, Hopkins J, Dixon JB, et al. Commissioning guidance for weight assessment and management in adults and children with severe complex obesity. <i>Obes Rev.</i> 2018;19(1):14-27. PMID: 209024367                                               | Population                                       |
| 391. Wethington HR, Finnie RKC, Buchanan LR, et al. Healthier Food and Beverage Interventions in Schools: Four Community Guide Systematic Reviews. <i>American journal of preventive medicine.</i> 2020;59(1):e15-e26.                                        | No meta-analysis or graded certainty of evidence |
| 392. Wickham CA, Carbone ET. What's technology cooking up? A systematic review of the use of technology in adolescent food literacy programs. <i>Appetite.</i> 2018;125:333-344. PMID: 29471069                                                               | Outcome                                          |

| Articles                                                                                                                                                                                                                                                                                                                              | Reason for Exclusion                           |
|---------------------------------------------------------------------------------------------------------------------------------------------------------------------------------------------------------------------------------------------------------------------------------------------------------------------------------------|------------------------------------------------|
| 393. Winkler MR, Bennett GG, Brandon DH. Factors related to obesity and overweight among Black adolescent girls in the United States. <i>Women Health</i> . 2017;57(2):208-248. PMID: 26933972                                                                                                                                        | SR does not have 2 databases or ROB assessment |
| 394. Wolf VLW, Samur-San-Martin JE, Sousa SF, et al. Effectiveness of Obesity Intervention Programs Based on Guidelines for Adolescent Students: Systematic Review. <i>Rev Paul Pediatr</i> . 2019;37(1):110-120. PMID: 30110114                                                                                                      | SR does not have 2 databases or ROB assessment |
| 395. Wong MM, Arcand J, Leung AA, Thout SR, Campbell NR, Webster J. The science of salt: A regularly updated systematic review of salt and health outcomes (December 2015-March 2016). <i>J Clin Hypertens (Greenwich)</i> . 2017;19(3):322-332. PMID: 28266792                                                                       | SR does not have 2 databases or ROB assessment |
| 396. World Health Organization. <i>Guideline: Assessing and Managing Children at Primary Health-Care Facilities to Prevent Overweight and Obesity in the Context of the Double Burden of Malnutrition: Updates for the Integrated Management of Childhood Illness (IMCI)</i> . Geneva: World Health Organization;2017. PMID: 29578661 | Population                                     |
| 397. Wolfenden L, Nathan NK, Sutherland R, et al. Strategies for enhancing the implementation of school-based policies or practices targeting risk factors for chronic disease. <i>Cochrane Database Syst Rev</i> . 2017;11(11):Cd011677.                                                                                             | No nutrition intervention of interest          |
| 398. Wolfenden L, Barnes C, Jones J, et al. Strategies to improve the implementation of healthy eating, physical activity and obesity prevention policies, practices or programmes within childcare services. <i>Cochrane Database Syst Rev</i> . 2020;2(2):Cd011779.                                                                 | No nutrition intervention of interest          |
| 399. World Health Organization. <i>Guideline: implementing effective actions for improving adolescent nutrition</i> . Geneva: World Health Organization; 2018.                                                                                                                                                                        | Study Design                                   |
| 400. Wu XY, Zhuang LH, Li W, et al. The influence of diet quality and dietary behavior on health-related quality of life in the general population of children and adolescents: a systematic review and meta-analysis. <i>Qual Life Res</i> . 2019;28(8):1989-2015. PMID: 30875010                                                    | Outcome                                        |
| 401. Wylie-Rosett J, Hu FB. Nutritional Strategies for Prevention and Management of Diabetes: Consensus and Uncertainties. <i>Diabetes Care</i> . 2019;42(5):727-730. PMID: 31010943                                                                                                                                                  | Study Design                                   |
| 402. Xin J, Zhao L, Wu T, et al. Association between access to convenience stores and childhood obesity: A systematic review. <i>Obes Rev</i> . 2021;22 Suppl 1:e12908. PMID: 31274248                                                                                                                                                | Study Design                                   |

| Articles                                                                                                                                                                                                                                                                                                                              | Reason for Exclusion                             |
|---------------------------------------------------------------------------------------------------------------------------------------------------------------------------------------------------------------------------------------------------------------------------------------------------------------------------------------|--------------------------------------------------|
| 403. Yang S, Zhang X, Feng P, et al. Access to fruit and vegetable markets and childhood obesity: A systematic review. <i>Obes Rev.</i> 2021;22 Suppl 1:e12980. PMID: 31943666                                                                                                                                                        | Study Design                                     |
| 404. Yau KW, Tang TS, Görges M, et al. Effectiveness of Mobile Apps in Promoting Healthy Behavior Changes and Preventing Obesity in Children: Systematic Review. <i>JMIR Pediatr Parent.</i> 2022;5(1):e34967.                                                                                                                        | No nutrition intervention of interest            |
| 405. Yee AZ, Lwin MO, Ho SS. The influence of parental practices on child promotive and preventive food consumption behaviors: a systematic review and meta-analysis. <i>Int J Behav Nutr Phys Act.</i> 2017;14(1):47. PMID: 28399881                                                                                                 | SR does not have 2 databases or ROB assessment   |
| 406. Yi DY, Kim SC, Lee JH, et al. Clinical Practice Guideline for the Diagnosis and Treatment of Pediatric Obesity: Recommendations from the Committee on Pediatric Obesity of the Korean Society of Pediatric Gastroenterology Hepatology and Nutrition. <i>Pediatr Gastroenterol Hepatol Nutr.</i> 2019;22(1):1-27. PMID: 30671370 | Other                                            |
| 407. Young KG, Duncanson K, Burrows T. Influence of grandparents on the dietary intake of their 2-12-year-old grandchildren: A systematic review. <i>Nutr Diet.</i> 2018;75(3):291-306. PMID: 29446218                                                                                                                                | No meta-analysis or graded certainty of evidence |
| 408. Zafar MI, Mills KE, Zheng J, et al. Low-glycemic index diets as an intervention for diabetes: a systematic review and meta-analysis. <i>Am J Clin Nutr.</i> 2019;110(4):891-902. PMID: 31374573                                                                                                                                  | Population                                       |
| 409. Zalewski BM, Patro B, Veldhorst M, et al. Nutrition of infants and young children (one to three years) and its effect on later health: A systematic review of current recommendations (EarlyNutrition project). <i>Crit Rev Food Sci Nutr.</i> 2017;57(3):489-500. PMID: 25751102                                                | Population                                       |
| 410. Zarnowiecki D, Mauch CE, Middleton G, et al. A systematic evaluation of digital nutrition promotion websites and apps for supporting parents to influence children's nutrition. <i>Int J Behav Nutr Phys Act.</i> 2020;17(1):17. PMID: 32041640                                                                                  | Outcome                                          |
| 411. Zeitler P, Arslanian S, Fu J, et al. ISPAD Clinical Practice Consensus Guidelines 2018: Type 2 diabetes mellitus in youth. <i>Pediatr Diabetes.</i> 2018;19 Suppl 27:28-46. PMID: 29999228                                                                                                                                       | Study Design                                     |
| 412. Zhang Q, Liu R, Diggs LA, Wang Y, Ling L. Does acculturation affect the dietary intakes and body weight status of children of immigrants in the U.S. and other developed countries? A systematic review. <i>Ethn Health.</i> 2019;24(1):73-93. PMID: 28406037                                                                    | SR does not have 2 databases or ROB assessment   |

| Articles                                                                                                                                                                                                                                                              | Reason for Exclusion                  |
|-----------------------------------------------------------------------------------------------------------------------------------------------------------------------------------------------------------------------------------------------------------------------|---------------------------------------|
| 413.Zhang S, de la Haye K, Ji M, An R. Applications of social network analysis to obesity: a systematic review. <i>Obes Rev.</i> 2018;19(7):976-988. PMID: 29676508                                                                                                   | No nutrition intervention of interest |
| 414.Zhao L, Dong X, Gao Y, et al. Effects of exercise combined with diet intervention on body composition and serum biochemical markers in adolescents with obesity: a systematic review and meta-analysis. <i>J Pediatr Endocrinol Metab.</i> 2022;35(11):1319-1336. | Population                            |

**Supplementary Table S7. AMSTAR2 Ratings in Critical Systematic Review Domains and Overall Certainty in Results for Systematic Reviews included in the Pediatric Overweight and Obesity Prevention Position Paper**

[illegible]

| <b>Systematic Review</b>     | <b>2. Explicit statement of a priori review methods</b> | <b>4. Comprehensive literature search strategy</b> | <b>7. List of excluded studies with justification</b> | <b>9. Satisfactory technique for assessing risk of bias</b> | <b>11. If meta-analysis, appropriate methods of combining results</b> | <b>13. Account for risk of bias of included studies when interpreting result</b> | <b>15. If quantitative analysis, investigation and discussion of impact of publication bias</b> | <b>Overall Confidence in Results of Review</b> |
|------------------------------|---------------------------------------------------------|----------------------------------------------------|-------------------------------------------------------|-------------------------------------------------------------|-----------------------------------------------------------------------|----------------------------------------------------------------------------------|-------------------------------------------------------------------------------------------------|------------------------------------------------|
| Hayba et al 2020             | Y                                                       | Y                                                  | Y                                                     | Y                                                           | No Meta                                                               | Y                                                                                | No Meta                                                                                         | High                                           |
| Hudak et al 2019             | N                                                       | Y                                                  | N                                                     | N                                                           | No Meta                                                               | Y                                                                                | No Meta                                                                                         | Critically Low                                 |
| Kenny et al 2022             | Y                                                       | Y                                                  | N                                                     | Y                                                           | No Meta                                                               | N                                                                                | No Meta                                                                                         | Critically Low                                 |
| Kornet-van der Aa et al 2017 | Y                                                       | Y                                                  | N                                                     | Y                                                           | No Meta                                                               | Y                                                                                | No Meta                                                                                         | Moderate                                       |
| Long et al 2021              | N                                                       | Y                                                  | N                                                     | Y                                                           | Y                                                                     | Y                                                                                | Y                                                                                               | Critically Low                                 |
| McHugh et al 2020            | Y                                                       | Y                                                  | N                                                     | Y                                                           | No Meta                                                               | N                                                                                | No Meta                                                                                         | Moderate                                       |
| Morgan et al 2020            | Y                                                       | Y                                                  | Y                                                     | Y                                                           | No Meta                                                               | Y                                                                                | No Meta                                                                                         | High                                           |
| Nally et al 2021             | Y                                                       | Y                                                  | N                                                     | Y                                                           | Y                                                                     | N                                                                                | Y                                                                                               | Critically Low                                 |
| Narzisi et al 2020           | N                                                       | Y                                                  | N                                                     | Y                                                           | No Meta                                                               | N                                                                                | No Meta                                                                                         | Critically Low                                 |
| Nury et al 2021              | Y                                                       | Y                                                  | Y                                                     | Y                                                           | Y                                                                     | Y                                                                                | Y                                                                                               | High                                           |
| Olstad et al 2017            | Y                                                       | Y                                                  | N                                                     | Y                                                           | No Meta                                                               | Y                                                                                | No Meta                                                                                         | Moderate                                       |
| Pineda et al 2021            | Y                                                       | N                                                  | N                                                     | Y                                                           | Y                                                                     | N                                                                                | Y                                                                                               | Critically Low                                 |

| <b>Systematic Review</b>   | <b>2. Explicit statement of a priori review methods</b> | <b>4. Comprehensive literature search strategy</b> | <b>7. List of excluded studies with justification</b> | <b>9. Satisfactory technique for assessing risk of bias</b> | <b>11. If meta-analysis, appropriate methods of combining results</b> | <b>13. Account for risk of bias of included studies when interpreting result</b> | <b>15. If quantitative analysis, investigation and discussion of impact of publication bias</b> | <b>Overall Confidence in Results of Review</b> |
|----------------------------|---------------------------------------------------------|----------------------------------------------------|-------------------------------------------------------|-------------------------------------------------------------|-----------------------------------------------------------------------|----------------------------------------------------------------------------------|-------------------------------------------------------------------------------------------------|------------------------------------------------|
| Qi et al 2021              | Y                                                       | N                                                  | N                                                     | Y                                                           | Y                                                                     | N                                                                                | Y                                                                                               | Critically Low                                 |
| Rochira et al 2020         | N                                                       | Y                                                  | N                                                     | Y                                                           | Y                                                                     | N                                                                                | N                                                                                               | Critically Low                                 |
| Salam et al 2020           | Y                                                       | Y                                                  | N                                                     | Y                                                           | Y                                                                     | Y                                                                                | N                                                                                               | Low                                            |
| Serel-Cortes et al 2021    | Y                                                       | Y                                                  | N                                                     | Y                                                           | Y                                                                     | Y                                                                                | N                                                                                               | Critically Low                                 |
| Silva et al 2022           | Y                                                       | Y                                                  | N                                                     | N                                                           | Y                                                                     | Y                                                                                | Y                                                                                               | Critically Low                                 |
| Singh et al 2017           | N                                                       | Y                                                  | N                                                     | Y                                                           | No Meta                                                               | Y                                                                                | No Meta                                                                                         | Critically Low                                 |
| Smit et al 2023            | Y                                                       | Y                                                  | Y                                                     | Y                                                           | Y                                                                     | Y                                                                                | Y                                                                                               | High                                           |
| Specchia et al 2018        | N                                                       | Y                                                  | N                                                     | Y                                                           | Y                                                                     | Y                                                                                | Y                                                                                               | Low                                            |
| Suleiman-Martos et al 2021 | N                                                       | Y                                                  | N                                                     | Y                                                           | Y                                                                     | N                                                                                | Y                                                                                               | Critically Low                                 |
| Tissot et al 2021          | Y                                                       | Y                                                  | N                                                     | Y                                                           | No Meta                                                               | Y                                                                                | No Meta                                                                                         | Moderate                                       |
| Wethington et al 2020      | N                                                       | Y                                                  | N                                                     | N                                                           | No Meta                                                               | N                                                                                | No Meta                                                                                         | Critically Low                                 |
| Whitehead et al 2021       | Y                                                       | Y                                                  | Y                                                     | Y                                                           | No Meta                                                               | N                                                                                | No Meta                                                                                         | Low                                            |

**Supplementary Table S8. Summary of Findings Table Describing Systematic Reviews Examining the Effects of Nutrition Interventions for Pediatric Obesity Prevention in Home & Family Settings in individuals 2-17 years of age.**

| Outcome<br>№ of participants<br>(studies)                                               | Anticipated absolute<br>effects (95% CI)                              | Certainty                  | What happens                                                                                                                                                                                                                                              |
|-----------------------------------------------------------------------------------------|-----------------------------------------------------------------------|----------------------------|-----------------------------------------------------------------------------------------------------------------------------------------------------------------------------------------------------------------------------------------------------------|
|                                                                                         | Difference                                                            |                            |                                                                                                                                                                                                                                                           |
| Combined Age Groups                                                                     |                                                                       |                            |                                                                                                                                                                                                                                                           |
| BMI <sup>1</sup><br>№ of participants: 1861<br>(4 RCTs)                                 | SMD <b>0.05</b> higher<br>(0.04 lower to 0.15<br>higher)              | ⊕⊕○○<br>LOW <sup>a,b</sup> | Interventions involving a caregiver in nutrition and physical activity interventions may result in little to no difference in BMI compared to interventions with a caregiver for children and adolescents 2-18 years of age.                              |
| Prevalence of<br>overweight/obesity <sup>1</sup><br>№ of participants: 1866<br>(3 RCTs) | RR: 1.02 (0.89, 1.17)                                                 | ⊕⊕○○<br>LOW <sup>a,b</sup> | Interventions involving a caregiver in nutrition and physical activity interventions may result in little to no difference in overweight or obesity prevalence compared to interventions with a caregiver for children and adolescents 2-18 years of age. |
| 0-5 years                                                                               |                                                                       |                            |                                                                                                                                                                                                                                                           |
| BMI z-score <sup>2</sup><br>№ of participants: 595<br>(3 RCTs)                          | MD <b>0.13 lower</b><br>(0.35 lower to 0.09<br>higher)                | ⊕⊕○○<br>LOW <sup>a,b</sup> | Nutrition and physical activity interventions in the home setting may have no affect on BMI z-score in children 0-5 years of age.                                                                                                                         |
| BMI <sup>2</sup><br>№ of participants: 778<br>(2 RCTs)                                  | MD <b>0.33 kg/m<sup>2</sup> lower</b><br>(0.55 lower to 0.1<br>lower) | ⊕⊕⊕⊕<br>HIGH               | Nutrition and physical activity interventions in the home setting reduce BMI in children 0-5 years of age.                                                                                                                                                |
| 6-12 years                                                                              |                                                                       |                            |                                                                                                                                                                                                                                                           |
| BMI z-score <sup>2</sup><br>№ of participants: 134<br>(1 RCT)                           | MD <b>0 0.03</b><br>(0.04 lower to 0.1<br>higher)                     | ⊕⊕○○<br>LOW <sup>ab</sup>  | One study described a nutrition and physical activity intervention in the home setting may result in little to no difference in BMI z-score in children 6-12 years of age.                                                                                |
| 13-17 years                                                                             |                                                                       |                            |                                                                                                                                                                                                                                                           |



| Outcome<br>№ of participants<br>(studies)                    | Anticipated absolute<br>effects (95% CI)                | Certainty                         | What happens                                                                                                                                                            |
|--------------------------------------------------------------|---------------------------------------------------------|-----------------------------------|-------------------------------------------------------------------------------------------------------------------------------------------------------------------------|
|                                                              | Difference                                              |                                   |                                                                                                                                                                         |
| BMI z-score <sup>2</sup><br>№ of participants: 75<br>(1 RCT) | MD <b>0.06 higher</b><br>(0.13 lower to 0.26<br>higher) | ⊕○○○<br>VERY<br>LOW <sup>ac</sup> | The evidence is very uncertain about the effect of nutrition and physical activity interventions in the home setting on BMI z-score for adolescents 13-18 years of age. |

*Explanations*

- Risk of bias in included studies.
- Small sample size or wide confidence interval, especially crossing the line of no effect.
- Marked down two levels for imprecision due to very low sample size and wide confidence interval crossing the line of no effect.

**Supplementary Table S9. Summary of Findings Table Describing Systematic Reviews Examining the Effects of Nutrition Interventions for Pediatric Obesity Prevention in Healthcare Settings in individuals 2-17 years of age.**

| Outcome<br>№ of participants<br>(studies)                                      | Anticipated absolute effects<br>(95% CI)           | Certainty                       | What happens                                                                                                                                                |
|--------------------------------------------------------------------------------|----------------------------------------------------|---------------------------------|-------------------------------------------------------------------------------------------------------------------------------------------------------------|
|                                                                                | Difference                                         |                                 |                                                                                                                                                             |
| Age Groups Combined                                                            |                                                    |                                 |                                                                                                                                                             |
| BMI z-score and percentile <sup>3</sup><br>№ of participants: 1750<br>(9 RCTs) | not pooled                                         | ⊕○○○<br>VERY LOW <sub>abc</sub> | The effect of nutrition and physical activity interventions in the healthcare setting on BMI z-scores and percentiles is uncertain.                         |
| 0-5 years                                                                      |                                                    |                                 |                                                                                                                                                             |
| BMI z-score <sup>2</sup><br>№ of participants: 121<br>(1 RCT)                  | MD <b>0.24 lower</b><br>(0.46 lower to 0.02 lower) | ⊕⊕○○<br>LOW <sub>a,c</sub>      | Nutrition and physical activity interventions in the healthcare setting may reduce BMI z-score in children 0-5 years of age.                                |
| Prevalence of overweight <sup>4</sup><br>№ of participants: Unclear<br>(1 RCT) | NR                                                 | ⊕○○○<br>VERY LOW <sub>acd</sub> | The effect of nutrition and physical activity interventions on prevalence of overweight in children ≤5 years of age in the healthcare setting is uncertain. |

**Explanations**

- Risk of bias in included studies.
- Inconsistent results between studies.
- Small sample size
- No effect size described.

**Supplementary Table S10. Summary of Findings Table Describing Systematic Reviews Examining the Effects of Nutrition Interventions for Pediatric Obesity Prevention in School Settings in individuals 2-17 years of age.**

| Outcome<br>№ of participants<br>(studies)                                               | Anticipated absolute<br>effects (95% CI)                     | Certainty                          | What happens                                                                                                                                                                              |
|-----------------------------------------------------------------------------------------|--------------------------------------------------------------|------------------------------------|-------------------------------------------------------------------------------------------------------------------------------------------------------------------------------------------|
|                                                                                         | Difference                                                   |                                    |                                                                                                                                                                                           |
| Age Groups Combined                                                                     |                                                              |                                    |                                                                                                                                                                                           |
| BMI z-score <sup>5</sup><br>№ of participants: 8174<br>(8 RCTs)                         | MD (95% CI): -0.09 (-<br>0.18, 0.00)                         | ⊕⊕○○<br>LOW <sup>ab</sup>          | In all age groups of children and adolescents combined, nutritional interventions to prevent pediatric obesity in the school setting may not affect BMI z-scores.                         |
| BMI <sup>5</sup><br>№ of participants:<br>12067<br>(10 RCTs)                            | MD (95% CI): [0.03 (-<br>0.10, 0.16)]                        | ⊕⊕○○<br>LOW <sup>ab</sup>          | In all age groups of children and adolescents combined, nutritional interventions to prevent pediatric obesity in the school setting may not affect BMI.                                  |
| Overweight and<br>Obesity Prevalence <sup>5</sup><br>№ of participants: 901<br>(3 RCTs) | OR (95% CI): 1.19 (0.95,<br>1.49)                            | ⊕○○○<br>VERY<br>LOW <sup>aab</sup> | In all age groups of children and adolescents combined, nutritional interventions to prevent pediatric obesity in the school setting may not affect prevalence of overweight and obesity. |
| 0-5 years                                                                               |                                                              |                                    |                                                                                                                                                                                           |
| BMI z-score <sup>2</sup><br>№ of participants: 4913<br>(10 RCTs)                        | MD <b>0.04 lower</b><br>(0.09 lower to 0.01<br>higher)       | ⊕⊕○○<br>LOW <sup>ab</sup>          | In children ≤ 5 years of age, nutrition and physical activity interventions in the childcare and preschool settings may not affect BMI z-score.                                           |
| BMI <sup>2</sup><br>№ of participants: 4683<br>(9 RCTs)                                 | MD <b>0.05 kg/m2 lower</b><br>(0.14 lower to 0.05<br>higher) | ⊕⊕○○<br>LOW <sup>a,b</sup>         | In children ≤ 5 years of age, nutrition and physical activity interventions in the childcare and preschool settings may not affect BMI.                                                   |
| 6-12 years                                                                              |                                                              |                                    |                                                                                                                                                                                           |

| Outcome<br>№ of participants<br>(studies)                                    | Anticipated absolute<br>effects (95% CI)           | Certainty                 | What happens                                                                                                                                                 |
|------------------------------------------------------------------------------|----------------------------------------------------|---------------------------|--------------------------------------------------------------------------------------------------------------------------------------------------------------|
|                                                                              | Difference                                         |                           |                                                                                                                                                              |
| BMI z-score <sup>2</sup><br>№ of participants:<br>22879<br>(15 RCTs)         | MD <b>0.05 lower</b><br>(0.1 lower to 0.01 lower)  | ⊕⊕⊕○<br>MODERATE<br>a     | Nutrition and physical activity interventions in the school setting likely reduces BMI z-score in children 6-12 years of age.                                |
| BMI <sup>2</sup><br>№ of participants:<br>18488<br>(16 RCTs)                 | MD <b>0.04 lower</b><br>(0.1 lower to 0.02 higher) | ⊕⊕○○<br>LOW a,b           | Nutrition and physical activity interventions in the school setting may not affect BMI in children 6-12 years of age.                                        |
| Overweight<br>Prevalence <sup>6</sup><br>№ of participants: 7059<br>(9 RCTs) | Not pooled                                         | ⊕⊕○○<br>LOW a,b           | Nutrition and physical activity interventions in the school setting may not affect overweight prevalence in children 6-12 years of age.                      |
| <b>13-17 years</b>                                                           |                                                    |                           |                                                                                                                                                              |
| BMI z-score<br>№ of participants:<br>16173<br>(5 RCTs)                       | <b>0</b><br>(0.06 lower to 0.06<br>higher)         | ⊕○○○<br>VERY LOW<br>a,b,c | Nutrition and physical activity interventions in the school setting may not affect BMI z-score in adolescents 13-18 years of age, but evidence is uncertain. |
| BMI<br>№ of participants:<br>16347<br>(8 RCTs)                               | MD <b>0.02 lower</b><br>(0.1 lower to 0.05 higher) | ⊕⊕○○<br>LOW a,c           | Nutrition and physical activity interventions in the school setting may not affect BMI in adolescents 13-18 years of age.                                    |

#### Explanations

- Risk of bias in included primary studies.
- Small sample size or wide confidence interval, especially one that crosses the line of no effect.
- Inconsistency in results between studies

**Supplementary Table S11. Summary of Findings Table Describing Systematic Reviews Examining the Effects of Nutrition Interventions for Pediatric Obesity Prevention in Community Settings in individuals 2-17 years of age.**

| Outcome<br>№ of participants<br>(studies)                                    | Anticipated absolute<br>effects (95% CI)                 | Certainty                         | What happens                                                                                                                                                                             |
|------------------------------------------------------------------------------|----------------------------------------------------------|-----------------------------------|------------------------------------------------------------------------------------------------------------------------------------------------------------------------------------------|
|                                                                              | Difference                                               |                                   |                                                                                                                                                                                          |
| All Age Groups                                                               |                                                          |                                   |                                                                                                                                                                                          |
| BMI z-score <sup>7</sup><br>№ of participants:<br>Unclear<br>(9 Trials)      | MD -0.07 (-0.13, -0.01)                                  | ⊕⊕○○<br>LOW <sup>ab</sup>         | Nutrition and physical activity interventions in the community setting may reduce BMI z-score in children 5-18 years of age.                                                             |
| Cost-effectiveness <sup>7</sup><br>№ of participants:<br>Unclear<br>(6 RCTs) | ICER \$8155AUD (\$237 to \$81,021) per HALY              | ⊕⊕○○<br>LOW <sup>ac</sup>         | Nutrition and physical activity interventions to prevent obesity in Australian community-based interventions may be cost-effective in participants 2-18 years of age.                    |
| 0-5 years                                                                    |                                                          |                                   |                                                                                                                                                                                          |
| BMI z-score <sup>2</sup><br>№ of participants:<br>632<br>(2 RCTs)            | MD <b>0.02 lower</b><br>(0.13 lower to 0.09 higher)      | ⊕⊕○○<br>LOW <sup>ac</sup>         | Nutrition and physical activity interventions in the community setting may have no effect on BMI z-score children 0-5 years of age.                                                      |
| BMI<br>№ of participants:<br>75<br>(1 RCT)                                   | MD <b>0.59 kg/m² lower</b><br>(0.94 lower to 0.24 lower) | ⊕○○○<br>Very LOW <sub>a,c,c</sub> | Nutrition and physical activity interventions in the community setting may reduce BMI in children 0-5 years, but evidence is uncertain.                                                  |
| 6-12 years                                                                   |                                                          |                                   |                                                                                                                                                                                          |
| BMI z-score<br>№ of participants:<br>657<br>(4 RCTs)                         | MD <b>0.04 lower</b><br>(0.39 lower to 0.31 higher)      | ⊕○○○<br>VERY LOW <sub>a,c</sub>   | The evidence is very uncertain and heterogeneous in regards to the effect of nutrition and physical interventions in the community setting on BMI z-score in children 6-12 years of age. |

| Outcome<br>№ of participants<br>(studies)                | Anticipated absolute<br>effects (95% CI)                  | Certainty                         | What happens                                                                                                                                                                             |
|----------------------------------------------------------|-----------------------------------------------------------|-----------------------------------|------------------------------------------------------------------------------------------------------------------------------------------------------------------------------------------|
|                                                          | Difference                                                |                                   |                                                                                                                                                                                          |
| BMI<br>№ of participants:<br>751<br>(9 RCTs)             | MD <b>0.08 kg/m2 lower</b><br>(0.29 lower to 0.13 higher) | ⊕⊕○○<br>LOW <sup>d</sup>          | Nutrition and physical activity interventions in the community may result in little to no difference in BMI in children 6-12 years of age.                                               |
| <b>13-17 years</b>                                       |                                                           |                                   |                                                                                                                                                                                          |
| BMI z-score<br>№ of participants:<br>Unclear<br>(4 RCTs) | MD <b>0.02 lower</b><br>(0.07 lower to 0.03 higher)       | ⊕○○○<br>VERY LOW <sup>a,c,d</sup> | The evidence is very uncertain and heterogeneous in regards to the effect of nutrition and physical interventions in the community setting on BMI z-score in children 6-12 years of age. |

#### Explanations

- Risk of bias in included primary studies.
- Inconsistency in results between studies
- Small sample size or wide confidence interval, especially one that crosses the line of no effect.
- Sample size unclear

**Supplementary Table S12. Summary of Findings Table Describing Systematic Reviews Examining the Effects of Federal Food Assistance Programs for Pediatric Obesity Prevention in Individuals 2-17 years of age.**

| Outcome<br>№ of participants<br>(studies)                                                                            | Difference   | Certainty                         | What happens                                                                                                                                                                                                                                                                               |
|----------------------------------------------------------------------------------------------------------------------|--------------|-----------------------------------|--------------------------------------------------------------------------------------------------------------------------------------------------------------------------------------------------------------------------------------------------------------------------------------------|
| SNAP Program <sup>8</sup><br>№ of participants: Unclear<br>9 observational studies                                   | not pooled   | ⊕○○○<br>VERY LOW <sup>a,b,c</sup> | The evidence is very uncertain about the effect of the SNAP program on weight outcomes in pediatric participants 2-18 years of age, with some evidence suggesting increased risk of overweight or obesity for certain sub-populations, including girls 5-18 years of age.                  |
| USDA Fresh Fruits and Vegetables Program <sup>9</sup><br>№ of participants: 335<br>(1 observational study)           | not pooled   | ⊕○○○<br>VERY LOW <sup>b,d</sup>   | The evidence is very uncertain about the effect of fresh fruit and vegetable programs on anthropometrics in children elementary school age but outside of the school setting. However, limited results suggest that 2 years of policy exposure resulted in decreased BMI z-scores and BMI. |
| CACFP Program <sup>10</sup><br>№ of participants: 4050<br>(1 observational study)                                    | Single study | ⊕○○○<br>VERY LOW <sup>e</sup>     | The evidence is very uncertain about the impact of the impact of the CACFP program on pediatric obesity prevention, but one study described no association with prevalence of overweight or obesity.                                                                                       |
| Universal School Meals <sup>11</sup><br>№ of participants: Unclear<br>(5 controlled trials, 2 non-controlled trials) | not pooled   | ⊕○○○<br>VERY LOW <sup>ce</sup>    | The evidence is very uncertain about the impact of the impact of universal school meals on pediatric obesity prevention, but limited evidence described there may be no association.                                                                                                       |
| 2009 WIC Food Package Revision <sup>12</sup><br>№ of participants: >16 million<br>(3 observational studies)          | not pooled   | ⊕○○○<br>LOW <sup>e</sup>          | The evidence is very uncertain about the impact of the 2009 revised WIC package, but the revised package may have decreased prevalence of overweight and obesity in children ≤5 years of age.                                                                                              |

*Explanations*

- a. Inconsistency in results between studies.
- b. No quantitative results available
- c. Sample sizes not provided.

- d. Small sample size
- e. Risk of bias in included studies

**Supplementary Table S13. Summary of Findings Table Describing Systematic Reviews Examining the Effects of Nutrition Interventions for Pediatric Obesity Prevention in Electronic Interventions in individuals 2-17 years of age.**

| Outcome<br>№ of participants<br>(studies)                          | Anticipated absolute effects (95%<br>CI)                | Certainty                     | What happens                                                                                    |
|--------------------------------------------------------------------|---------------------------------------------------------|-------------------------------|-------------------------------------------------------------------------------------------------|
|                                                                    | Difference                                              |                               |                                                                                                 |
| BMI z-score <sup>13</sup><br>№ of participants:<br>571<br>(2 RCTs) | MD <b>0.05 SD higher</b><br>(0.21 lower to 0.11 higher) | ⊕⊕○○<br>LOW <sup>ab</sup>     | Gamification including nutrition may have no effect on BMI z-score in children and adolescents. |
| BMI <sup>14</sup><br>№ of participants:<br>3542<br>(9 RCTs)        | MD <b>0.02 lower</b><br>(0.18 lower to 0.14 higher)     | ⊕⊕⊕○<br>MODERATE <sup>c</sup> | Mobile phone interventions did not affect BMI for adolescents 10-19 years of age.               |

*Explanations*

- a. Small sample size
- b. Wide confidence interval, especially if crossing the line of no effect.
- c. Risk of bias in included studies.



## References

1. Morgan EH, Schoonees A, Sriram U, Faure M, Seguin-Fowler RA. Caregiver involvement in interventions for improving children's dietary intake and physical activity behaviors. *Cochrane Database Syst Rev*. 2020;1(1):Cd012547.
2. Brown T, Moore TH, Hooper L, et al. Interventions for preventing obesity in children. *Cochrane Database Syst Rev*. 2019;7(7):Cd001871.
3. Tissot H, Pfarrwaller E, Haller DM. Primary care prevention of cardiovascular risk behaviors in adolescents: A systematic review. *Preventive medicine*. 2021;142:106346.
4. Narzisi K, Simons J. Interventions that prevent or reduce obesity in children from birth to five years of age: A systematic review. *Journal of child health care : for professionals working with children in the hospital and community*. 2020:1367493520917863.
5. Nury E, Stadelmaier J, Morze J, et al. Effects of nutritional intervention strategies in the primary prevention of overweight and obesity in school settings: systematic review and network meta-analysis. *BMJ Med*. 2022;1(1):e000346.
6. Smit MS, Boelens M, Mölenberg FJM, Raat H, Jansen W. The long-term effects of primary school-based obesity prevention interventions in children: A systematic review and meta-analysis. *Pediatr Obes*. 2023;18(3):e12997.
7. Ananthapavan J, Nguyen PK, Bowe SJ, et al. Cost-effectiveness of community-based childhood obesity prevention interventions in Australia. *Int J Obes (Lond)*. 2019;43(5):1102-1112.
8. Hudak KM, Racine EF. The Supplemental Nutrition Assistance Program and Child Weight Status: A Review. *Am J Prev Med*. 2019;56(6):882-893.
9. Olstad DL, Ancilotto R, Teychenne M, et al. Can targeted policies reduce obesity and improve obesity-related behaviours in socioeconomically disadvantaged populations? A systematic review. *Obes Rev*. 2017;18(7):791-807.
10. Kenney EL, Tucker K, Plummer RS, Mita C, Andreyeva T. The Child and Adult Care Food Program and young children's health: a systematic review. *Nutr Rev*. 2023.
11. Cohen JFW, Hecht AA, McLoughlin GM, Turner L, Schwartz MB. Universal School Meals and Associations with Student Participation, Attendance, Academic Performance, Diet Quality, Food Security, and Body Mass Index: A Systematic Review. *Nutrients*. 2021;13(3).
12. Caulfield LE, Bennett WL, Gross SM, et al. AHRQ Comparative Effectiveness Reviews. In: *Maternal and Child Outcomes Associated With the Special Supplemental Nutrition Program for Women, Infants, and Children (WIC)*. Rockville (MD): Agency for Healthcare Research and Quality (US); 2022.
13. Suleiman-Martos N, García-Lara RA, Martos-Cabrera MB, et al. Gamification for the Improvement of Diet, Nutritional Habits, and Body Composition in Children and Adolescents: A Systematic Review and Meta-Analysis. *Nutrients*. 2021;13(7).
14. Beck Silva KB, Miranda Pereira E, Santana MLP, Costa PRF, Silva RCR. Effects of computer-based interventions on food consumption and anthropometric parameters of adolescents: A systematic review and metanalysis. *Crit Rev Food Sci Nutr*. 2022:1-13.
